# Supplementary material for: The pattern of alternative splicing in lung adenocarcinoma shows novel events correlated with tumorigenesis and immune microenvironment
Source: Research Square preprint supplement (doi:10.21203/rs.3.rs-960327/v1), 2021-10-13
Supplement: Supplementary file 1 [file ac1a59dc710a7a38af31765a.xlsx]

## Sheet: diffAutophagyExp
ID	TCGA-05-4384	TCGA-05-4389	TCGA-05-4396	TCGA-05-4397	TCGA-05-4415	TCGA-05-4418	TCGA-05-4420	TCGA-05-4422	TCGA-05-4426	TCGA-05-4432	TCGA-05-4433	TCGA-05-5429	TCGA-35-5375	TCGA-38-4625	TCGA-38-4630	TCGA-38-4631	TCGA-44-2655	TCGA-44-2666	TCGA-44-5643	TCGA-44-5644	TCGA-44-6146	TCGA-44-6776	TCGA-44-7659	TCGA-44-7660	TCGA-44-7667	TCGA-44-7669	TCGA-44-7670	TCGA-44-7671	TCGA-44-A47A	TCGA-44-A47B	TCGA-44-A4SU	TCGA-49-4486	TCGA-49-4488	TCGA-49-4494	TCGA-49-4506	TCGA-49-4507	TCGA-49-4510	TCGA-49-4514	TCGA-49-6742	TCGA-49-6761	TCGA-49-6767	TCGA-49-AAQV	TCGA-49-AAR0	TCGA-49-AAR2	TCGA-49-AAR4	TCGA-49-AAR9	TCGA-49-AARE	TCGA-49-AARN	TCGA-49-AARQ
SYS1|59524|AP	0.1011	0.1837	0	0.0664	0	0.2184	0.0304	0.2524	0.1768	0.0248	0.5032	0	0	0.1031	0	0.1837	0.1043	0.196256	0	0	0.234522	0	0.2935	0	0.0578	0.1093	0.0207	0.0312	0.1684	0.14786	0.1051	0.0371	0	0.0382	0	0.0578	0.0485	0.0691111	0.0734222	0.10578	0.1011	0.0861	0.0736	0.1011	0	0.0778	0	0	0.0578
MEIS3|50645|AA	0.0924	0.1124	0.2602	0.2602	0.025	0.2835	0.3427	0.1319	0.3258	0.1871	0.163	0.4068	0.35847	0.4144	0.4749	0.6214	0.1837	0.0544	0.0464	0.4871	0.1919	0.0544	0.0464	0.3877	0.1999	0.0803	0.3042	0.0566	0.2835	0.413	0.3071	0.0307	0.3362	0.3601	0.4054	0.6828	0.2261	0.33882	0.1805	0.2968	0.34601	0.2057	0.3877	0.6551	0.7169	0.572	0.4545	0.7036	0.39107
ZNF195|13975|ES	0.1823	0	0.4811	0.116	0.1508	0.2074	0.0612	0.1979	0.0005	0.2253	0.120367	0.004	0	0.0628	0.0497	0.3006	0.3311	0.219786	0.0513	0.4508	0.1733	0.1225	0.136	0.3454	0.3751	0.293	0.1664	0.0912	0.1743	0.1964	0	0.5961	0.0578	0.0275	0.0399	0.286038	0.0438	0.233383	0.4884	0.0369	0.172811	0	0.3524	0.7638	0.5052	0.8049	0.2077	0.012	0.4492
PTPN6|20023|AP	0.4994	0.4981	0.2912	0.3218	0.6292	0.291	0.2685	0.615	0.473	0.5218	0.6627	0.2835	0.5042	0.5615	0.3363	0.1721	0.4614	0.6395	0.2409	0.3836	0.8324	0.077	0.5379	0.3635	0.1405	0.3292	0.3156	0.2386	0.6237	0.6962	0.649	0.1455	0.4359	0.4424	0.3493	0.5645	0.372	0.4004	0.082	0.6322	0.3711	0.5553	0.6803	0.6212	0.688	0.2457	0.4785	0.5325	0.855
FGD3|86889|AP	0.1571	0.0406	0.23595	0.2089	0.2259	0.2365	0.4664	0.0978	0.1449	0.2324	0.1593	0.14386	0.19737	0.1936	0.4566	0	0.3698	0.5564	0.3083	0.4107	0.5084	0.3826	0.5086	0.4431	0.2632	0.2393	0.3413	0.2295	0.3002	0.4462	0.3539	0.7363	0.3433	0	0.5374	0.7555	0.3916	0.3855	0.19749	0.1595	0.3229	0.2087	0.1533	0.4554	0.1871	0.6765	0.6421	0.085	0.5315
NPLOC4|44131|AP	0.1163	0.0133	0.0648	0	0	0.1217	0.0461	0.0583	0.2386	0.0841	0	0.0859	0.3236	0	0.0203	0.1114	0.0798	0.4673	0.0149	0.0681	0.2312	0.0648	0.1163	0.104	0.0577	0.049	0.0178	0.0859	0.1764	0.0135	0.3375	0	0.0898	0.0898	0	0.1648	0.2539	0	0.042	0.0859	0.042	0.1114	0.172	0.1582	0.0541	0.2053	0.1307	0.3541	0.12389
SH3PXD2A|13020|AP	0	0.0596	0.12	0.082	0.09185	0.4854	0	0.4165	0.1056	0.0374	0.2443	0.09018	0.06523	0	0.4086	0.08544	0.2771	0.236	0.0689	0.161	0.2692	0.06627	0	0	0.2421	0.1083	0	0.0486	0.2263	0	0	0.03946	0	0	0.06595	0.04437	0.09532	0.04308	0	0	0.07803	0.0681	0	0.05068	0.09367	0.0928	0	0.08056	0.054
SCNM1|7563|AP	0.097	0.0828	0.0584	0.044	0	0.0882	0.0331	0.0415	0.1122	0.0266	0.22	0.0291	0.0866	0.0266	0.0649	0.0186	0.0842	0	0.0455	0.0051	0	0.0496	0.0892	0.012	0.0258	0.0288	0.0128	0.0279	0.0867	0.1324	0.0442	0.0235	0.1195	0.1079	0.0465	0.0263	0.037	0.0176	0.0576	0.0298	0.0492	0.0379	0.0849	0.128	0.098	0.0119	0.0243	0.0563	0.0436
CECR1|60973|AP	0.3991	0.2148	0.34408	0.8717	0.0811	0.9037	0.8854	0.7986	0.1276	0.3986	0.8375	0.4283	0.398183	0.2928	0.3493	0.414275	0.1944	0.166	0.382586	0	0	0	0.5414	0.0796	0.364	0.5615	0.2517	0.1265	0.519456	0.420189	0.2103	0.0731	0.1255	0.42554	0.5194	0.526129	0.042	0	0	0.473087	0.384914	0.3672	0.3151	0.6888	0.7311	0.268813	0.361689	0.441244	0.293329
ARGLU1|26231|AP	0.0655	0.0445	0.0557	0.0006	0.0273	0.0236	0.0486	0.0507	0.0309	0.0336	0.0721	0	0.0571	0.0211	0.0202	0.0228	0.0523	0.1812	0.0165	0.0713	0.4016	0.0923	0.0429	0.0146	0	0.1209	0.1032	0.0232	0.017	0.0092	0.0327	0.0048	0.065	0.0168	0.0526	0	0.1211	0	0.0625	0.0676	0	0.0398	0.1538	0.0855	0.0661	0.0114	0.0207	0.0858	0
MKL1|62349|AP	0.0839	0.1724	0.038	0.0784	0.0391	0.2195	0.0247	0.177	0.1007	0.1642	0.2	0	0.3792	0.2033	0.061	0.0971	0.3094	0.5733	0.1713	0	0.7633	0.1089	0.4019	0.161	0.0252	0.1359	0.0558	0.0924	0.4827	0.1111	0.1022	0.0443	0.106	0.1703	0.1067	0.2118	0.0546	0.3496	0	0.2118	0.2118	0.068	0.1251	0.2682	0.1007	0	0.035	0.2118	0.1713
PTGER3|3415|AT	0.237	0.125	0	0.0833	0	0.0936	0.0405	0.4067	0.0115	0.2999	0.018	0.1514	0.1519	0.1183	0.2631	0.0676	0.5085	0.1099	0	0.0226	0.1823	0.3152	0.1862	0.0826	0.0645	0.032	0.2324	0.2926	0.395	0.1927	0.189	0.3785	0	0.1951	0.0745	0.1405	0.1833	0.2974	0.0489	0.1415	0.0731	0.1611	0.2714	0.3949	0.0835	0	0.0912	0.0141	0.0162
GSN|87422|AP	0.097	0.053	0.0564	0.128	0.0452	0.0305	0.1316	0.0412	0.0506	0.0256	0.1535	0.1244	0.032	0.0299	0.0094	0.1251	0.0954	0.0932	0.0858	0.0898	0.0347	0.3948	0.084	0.2185	0.0307	0.0421	0.0946	0.0929	0.1172	0.7086	0.0851	0.2357	0.0857	0.0717	0.041	0.0257	0.2338	0.1678	0.1339	0.0252	0.0032	0.0826	0.0356	0.0296	0.0882	0.1347	0.0721	0.1309	0.0209
RGS3|87291|AP	0.0127	0.161	0.0247	0.5783	0.6278	0.1248	0.1146	0.3936	0.1346	0.2178	0.2295	0.1036	0.1784	0.2605	0.2699	0.114	0.0376	0.1331	0.1219	0.1821	0.0256	0.0595	0.2425	0.2589	0.5465	0.3318	0.2695	0.1802	0.1913	0.1957	0.0547	0.0988	0.2063	0.1596	0.1158	0.1664	0.0299	0.0614	0.176	0.0412	0.3924	0.1068	0.0862	0.0261	0.1414	0.4054	0.0627	0.0143	0.1353
ACSS2|59036|AP	0.138	0.041	0.0307	0.0064	0	0.072	0.0344	0.0123	0.0281	0.0349	0.3832	0.5513	0	0	0.0296	0	0.3628	0	0.0134	0.08132	0.173433	0	0.1419	0	0	0.3628	0.1595	0.2546	0.0207	0	0.1022	0.0575	0	0	0.2146	0.1673	0	0.07703	0	0.1595	0.4606	0	0.2329	0	0.0691	0	0	0.1855	0
NADK|226|AP	0.4516	0.1994	0.4051	0.2205	0.2561	0.4423	0.2068	0.4952	0.1685	0.2846	0.0552	0.1926	0.0324	0.0324	0.197	0.2067	0.2989	0.5985	0.0911	0.1861	0.3404	0.2429	0.462	0.3792	0.0513	0.4418	0.3446	0.214	0.2163	0.2706	0.2907	0.3899	0.091	0.1659	0.6282	0.1841	0.2736	0.3127	0.6102	0.0399	0.2075	0.1908	0.384	0.4348	0.3336	0.4053	0.5979	0.1253	0.2354
VAV1|47087|AP	0.1611	0.0568	0.131	0.131	0.1691	0.1523	0.2605	0.0542	0.0856	0.0924	0.1047	0.0437	0.4043	0.0151	0.2533	0.5758	0.1812	0.7095	0.1562	0.6706	0.9016	0.2253	0.1006	0.2253	0.0968	0.0813	0.1657	0.0323	0.0739	0.1077	0.1896	0.5377	0.0308	0.1486	0.1902	0.3373	0.2365	0.4488	0.120112	0.145	0.0924	0.1674	0.0813	0.3115	0.0387	0.5599	0.421	0.2763	0.0415
DUSP14|40523|AP	0	0	0.0686	0.033	0.0222	0	0.0202	0	0.2357	0.0081	0.0858	0.243	0.1155	0.0416	0.026	0	0.028	0.4557	0	0	0.4977	0	0.237	0.0373	0.0159	0.0336	0.1964	0.1574	0	0.0297	0.0752	0.062	0	0	0.0107	0.06	0.016	0.1505	0.0581	0	0.1159	0.114	0.0639	0.028	0.1732	0.0735	0.0402	0.1821	0.1616
DLC1|82764|AP	0.0612	0.0628	0.1368	0.1484	0.2288	0.0612	0.1163	0.048	0.0278	0.0515	0.0339	0.4029	0.175762	0.14	0.0766	0.157556	0.0946	0.3134	0.10426	0	0.5751	0.0545	0	0.1091	0.3433	0.1116	0.0883	0.0685	0.0524	0.0125	0.1567	0	0	0	0.2448	0.10514	0.0483	0.101189	0.0571	0.11909	0.11074	0.2089	0	0	0.6703	0.3034	0	0.1993	0.12468
PRKACB|3584|AP	0.3401	0.4262	0.1303	0.6723	0.5704	0.3296	0.5515	0.1965	0.7416	0.3329	0.0501	0.0072	0.5966	0.1047	0.805	0.1336	0.2637	0.0416	0.5965	0.44639	0.0269	0.1079	0.1757	0.7566	0.9298	0.5557	0.8052	0.3089	0.1349	0.5321	0.2689	0.4763	0.6539	0.3847	0.3227	0.6208	0.3238	0.2327	0.5372	0.3589	0.1853	0.3953	0.6263	0.2879	0.2913	0.4637	0.6703	0.269	0.4763
HYAL2|65006|AA	0.1261	0	0.3377	0.1236	0	0.0748	0.1768	0.1172	0	0.1313	0.0847	0.0836	0.2068	0.1412	0.1953	0.1355	0.1194	0.1735	0.0979	0.0801	0.5676	0.0523	0.136344	0.1417	0.1043	0.0767	0.0974	0.0481	0.0498	0.181	0.1693	0.0707	0.2652	0.3958	0.0769	0.0794	0.0727	0.0216	0.1362	0.2727	0.5264	0.1669	0.08	0.0453	0	0.4652	0.1279	0.1939	1
TMCC1|66748|AP	0.0766	0.0201	0.0207	0.0275	0.2112	0.0379	0.0193	0.0154	0.1325	0.053	0.0179	0.2803	0	0.011	0.0833	0	0.2427	0.1339	0.0293	0.0233	0.1011	0.0718	0.1097	0.0094	0	0.0325	0.1844	0.1274	0.0288	0.0812	0.2055	0.0822	0.0448	0.1355	0.0157	0.0269	0.0215	0.0494	0.0202	0.3537	0.1481	0.0323	0.0342	0	0.3291	0.2208	0.0897	0.3003	0.0663
TRAK1|64265|AP	0.0261	0.0082	0.0133	0.3804	0.266	0.0115	0.0137	0.0183	0.0206	0.0488	0.0041	0	0	0.1154	0.3899	0	0.016	0.2552	0.1255	0	0.0686	0	0.044	0.0224	0.0249	0.0812	0.0165	0	0.0301	0.0392	0.0137	0	0	0	0.2655	0	0.0282	0.035	0	0.01562	0	0.0359	0.0188	0.02495	0.0333	0.0082	0.0167	0.0341	0.03744
MCF2L|26317|AP	0.1038	0.0647	0.1169	0.0859	0.6493	0.0964	0.1235	0.0629	0.0173	0.1809	0.3211	0.3021	0.2691	0.87	0.9071	0.2857	0.3331	0.3163	0.1078	0.1681	0.217	0.1184	0.3508	0.1856	0.047	0.3623	0.1456	0.3578	0.1675	0.0969	0.0845	0.0599	0.0465	0.0226	0.0613	0.22945	0.2591	0.0788	0.1065	0.30867	0.34352	0.1786	0.2626	0.0478	0.3485	0.6129	0.1913	0.4128	0.0506
VGLL4|63393|AP	0.2848	0.3208	0.231	0.2414	0.179	0.2782	0.2456	0.2922	0.2722	0.1651	0.3143	0.392	0.2954	0.267	0.0812	0.4593	0.1747	0.032	0.5218	0.1816	0.0109	0.4276	0.3592	0.1826	0.0625	0.102	0.1808	0.1583	0.1251	0.2318	0.1023	0.4476	0.2949	0.2324	0.5109	0.3639	0.3248	0.1826	0.4488	0.195	0.1331	0.2433	0.2879	0.0732	0.18	0.363	0.2324	0.1315	0.2332
LIMS1|54886|AP	0.0168	0.0543	0.034	0.0211	0.0119	0.0415	0.0208	0.0796	0.074	0.0392	0.0845	0	0	0.0444	0.0086	0	0.0268	0.2977	0.0306	0	0.2615	0.0354	0.0469	0.0128	0.0656	0.0972	0.0222	0.039	0.1227	0.1008	0.0418	0	0.0379	0.0248	0.0883	0.2098	0.0296	0.0818	0.0247	0.0271	0	0.0632	0.2194	0.2418	0.0626	0.0308	0.0479	0.1025	0.2138
DNMT3A|52857|AT	0.045	0.1347	0.02	0.0696	0.0169	0.084	0.4069	0.0652	0.1259	0.0485	0.075	0.067	0.0882	0.1118	0.0082	0.0169	0.1078	0.2516	0.05	0.0175	0.1787	0.0915	0.0914	0.0327	0.0138	0.0326	0.0175	0.0526	0.0973	0.0681	0.0434	0.1669	0.0787	0.0848	0.1364	0.0913	0.1102	0.0394	0.0204	0.0304	0.2274	0.0938	0.0542	0.027	0.0598	0.0889	0.0218	0.1094	0.0298
RASSF1|65017|AP	0.0412	0.1341	0.0798	0.0519	0.0187	0.0774	0.0791	0.0907	0.0621	0.0782	0.1724	0.03	0.1647	0.0551	0.0598	0.0088	0.0449	0.0708	0	0.0091	0.132887	0.0831	0.0508	0.0685	0.0139	0.0251	0.0127	0.0351	0.0883	0.0754	0.032	0.0212	0.0482	0.147	0.0609	0.0231	0.0499	0.2714	0.0127	0.0393	0.0529	0.1336	0.069	0.0391	0.2148	0.0595	0.0322	0.0138	0.0438
PLEKHA1|13355|ES	0.1222	0.1591	0.0254	0.0802	0.4824	0.0913	0.0605	0.21	0.1424	0.3319	0.0897	0.0491	0.1256	0.1506	0.2129	0.0614	0.1641	0.0634	0.0183	0	0.0719	0.1264	0.1595	0.1061	0.2008	0.1214	0.0912	0.1477	0.1316	0.2097	0.0705	0.056	0.09	0.1063	0.0351	0.1751	0.064	0.2543	0.1074	0.0516	0.2326	0.0935	0.2904	0.1373	0.0733	0.0325	0.1134	0.2841	0.0989625
TTC7B|28826|ES	0.1743	0	0.09068	0.026	0.0225	0.0625	0.0808	0.0808	0.0482	0.0405	0	0.07398	0.08759	0.0098	0.0173	0.05173	0.1296	0.26025	0	0.0501	0.261437	0.09343	0.08818	0.0359	0.0392	0.2307	0.092	0.2906	0	0.0214	0.034	0	0.06344	0.0693	0	0	0.1596	0.06862	0.08999	0.04532	0.0183	0.0183	0.0635	0.0954	0.0657	0.0595	0.0954	0.06726	0.05689
FNBP1|87887|ES	0.22124	0.2772	0.32325	0.2399	0.4464	0.0481	0.34891	0.1352	0.4602	0.1235	0.1527	0.331478	0.252356	0.3683	0.8707	0.43697	0.0454	0.104	0.5859	0.398711	0	0.19496	0.3831	0.4684	0.472	0.2638	0.1893	0.1076	0	0.362	0.3732	0.2997	0.4088	0.31307	0.0455	0.266044	0.25478	0.291733	0.2737	0.25045	0.2783	0.0671	0	0.2864	0.2205	0.6602	0.5927	0.3745	0.407567
SYTL4|89602|AT	0.067	0.0588	0.1472	0.0736	0.1834	0.1205	0.1453	0.1576	0.0326	0.1117	0.0673	0.0886	0.0648	0.1502	0.1625	0.0392	0.0579	0.2159	0.0863	0.114	0.2268	0.1331	0.1363	0.1051	0.061	0.1567	0.1208	0.0686	0.1384	0.0902	0.0662	0.1589	0.0347	0.0478	0.1757	0.0896	0.0867	0.1227	0.1019	0.0437	0.0204	0.0265	0.1116	0.1851	0.0702	0.0798	0.0721	0.0508	0.0572
PLA2G15|37203|ES	0.2441	0.0656	0.2374	0.0573	0.1215	0.1497	0.1501	0.1972	0.1113	0.106	0.1566	0	0.1874	0.0919	0.1859	0.1424	0.2624	0.8655	0.1215	0.612	0.7244	0.2459	0.1634	0.6954	0.1017	0.1846	0.1181	0.0895	0.3991	0.4798	0.4293	0.4409	0.1311	0.2206	0.744	0.6575	0.3548	0.7888	0.2287	0.2319	0.1215	0.3695	0.3837	0.5546	0.2023	0.1719	0.5214	0.1827	0.7218
PTPN4|55141|AP	0	0	0	0.0753	0.0985	0.0868	0.1124	0.4414	0.079	0	0.2754	0.1478	0.3804	0	0	0	0	0.3837	0	0	0.6286	0.1535	0	0.2101	0	0.3399	0	0	0.2495	0	0	0	0.2047	0.2218	0	0	0.0665	0	0	0.4438	0	0.1535	0	0.4204	0	0	0	0	0
ZFYVE21|29513|ES	0.1018	0.0258	0.1273	0.0551	0.1937	0.148	0.0895	0.0373	0.0246	0.108	0.0965	0.0464	0.0267	0.0515	0.1999	0.1073	0.0743	0.0153	0.1469	0.1075	0.3314	0.0686	0.0557	0.1529	0.0777	0.4489	0.1174	0.0242	0.0763	0.0048	0.0787	0.0566	0.018	0.2198	0.1292	0.0683	0.0656	0.0692	0.0991	0.1085	0.1376	0.0601	0.1225	0.0719	0.0975	0.1587	0.0279	0.023	0.2414
ARID5B|11866|AP	0.1953	0.1688	0.143	0.182	0.1178	0.0848	0.1656	0.2502	0.0937	0.2889	0.0626	0.154	0.5003	0.2025	0.365	0.26236	0.5717	0.2669	0.2057	0.23351	0.0736	0.1335	0.1178	0.182	0	0.1292	0.098	0.412	0.23082	0.1251	0.2911	0.5717	0.2752	1	0.21413	0.24163	0.1584	0.2406	0.2092	0.1371	0.23564	0.3268	0.2288	0.1601	0.1082	0.5503	0.143	0.025	0.30896
PADI4|851|AT	0.2535	0.5508	0	0.0401	0.0936	0.1737	0.3334	0.0702	0.1554	0.3622	0.0614	0	0.5508	0.5087	0.0683	0.3954	0.1171	0.0339	0.3158	0.1813	0.0327	0.1357	0.0393	0.0983	0.4524	0.222	0.3003	0.202	0.1823	0.0401	0.0248	0.0873	0.0893	0.903	0.3361	0.118	0.1261	0.3291	0.3117	0.1405	0.1514	0.1229	0.3394	0.0504	0.1934	0	0.2274	0	0.0531
FBLN5|28892|ME	0.0764	0	0	0.0133	0	0	0.0928	0.0227	0.0214	0.1725	0.021	0	0.0272	0.0454	0.0549	0.3087	0.0652	0.0513	0.0505	0	0.0843	0.1329	0.1104	0	0	0.0141	0.0089	0.1545	0.0318	0.0157	0.0047	0.1042	0	0.1285	0.0113	0	0.0447	0.0397	0.0723	0.0555	0	0.0072	0.0128	0	0	0	0.0075	0	0.0194
MEST|81804|AP	0.5275	0.0775	0.2056	0.0664	0.0578	0.067	0.0509	0.166	0.2752	0.0619	0.2635	0.0442	0.0458	0.3188	0.0699	0.0159	0.1773	0.0366	0.0414	0.0619	0.33937	0.1335	0.0664	0.0158	0.0218	0.072	0.0333	0.156	0.0958	0.0981	0.0277	0.1097	0.0214	0.0402	0.0812	0.0619	0.3727	0.1167	0.2307	0.0725	0.0147	0.0353	0.0809	0.0299	0.1385	0	0.0531	0.0846	0.1036
IL11RA|86206|AP	0.0801	0.0287	0	0.0262	0	0	0.0607	0.0417	0	0	0.1475	0.07288	0.1526	0	0.4252	0	0.2204	0.0393	0.2864	0	0	0	0.0832	0	0	0.0403	0.1225	0	0	0.0823	0.1958	0.0757	0	0	0.1156	0.2626	0.0532	0	0	0	0	0.1704	0.1241	0.286	0.0823	0	0.0648	0	0
AQP1|79157|AP	0.053	0.13	0.1269	0.1314	0.2273	0.1886	0.2377	0.2285	0.0078	0.0756	0.0217	0.2276	0.0983	0.0548	0.0608	0.322	0.0594	0.0687	0.2964	0.3318	0.2605	0.0944	0.162	0.3394	0.4747	0.0163	0.0899	0.1198	0.0912	0.0072	0.1854	0.1821	0.0765	0.0313	0.1639	0.3829	0.0604	0.1933	0.0656	0.0535	0.1807	0.2169	0.0629	0.0462	0.1378	0.2038	0.1656	0.0411	0.6802
CD44|15133|ES	0.5139	0.0469	0.2488	0.0382	0.22187	0.1043	0.2142	0.1617	0.2954	0.0468	0.2159	0.4434	0.2813	0.6545	0.0923	0.20183	0.3617	0.4045	0.2567	0.3785	0.178	0.6534	0.3814	0.3718	0.18873	0.0899	0.1735	0.2535	0.5243	0.2455	0.5552	0.7003	0.3985	0.1098	0.5232	0.2727	0.2224	0.3386	0.6694	0.3038	0.3235	0.294	0.2376	0.1044	0.3273	0.4451	0.1192	0.6089	0.4078
MARK3|29450|ES	0.0868	0.0528	0.1571	0.0168	0.2379	0.048	0.0998	0.074	0.0219	0.089	0.073	0.129	0.0724	0.0408	0.0553	0.0527	0.128	0.2442	0.0926	0.0443	0.1327	0.048	0	0.0351	0.1234	0.0846	0.1207	0.1772	0.0885	0.1349	0.0766	0.0354	0.1004	0.085	0.0921	0.09	0.0445	0.0673	0.0886	0.0894	0.0808	0.053	0.063	0.0423	0.0947	0.0653	0.1239	0.0515	0
SORL1|19184|AP	0.3255	0.1912	0	0	0.0983	0.0942	0	0.2209	0.0482	0.0176	0	0.0634	0.07918	0.07391	0	0	0	0.3454	0	0.0619	0.4666	0	0.09145	0.0503	0.0231	0.0163	0	0	0.2648	0.0117	0	0.08144	0	0.06142	0.10736	0.0832556	0	0.0798444	0	0.0430778	0.06224	0.1684	0	0.0776333	0.06534	0.0271	0.05977	0.0983	0.0558375
TCF7L2|13147|ES	0	0.0716	0.0178	0.0955	0.1945	0.0468	0.0621	0.0467	0.0941	0.0196	0.0611	0	0	0	0.0683	0.1165	0.02	0.1475	0.1603	0	0	0.1496	0.0369	0.0886	0.0882	0.0705	0.0627	0.0689	0	0.1375	0.1272	0.1701	0	0	0.0587	0.0387667	0.0262	0.0328556	0.0169	0.0332667	0	0.033	0.05256	0.0472	0.0857	0.0242	0.0364	0	0.06746
TCF7L2|151705|ME	0	0.0318	0.0374	0.2333	0.2355	0.0409	0.1079	0.0295	0.0668	0.0872	0.0253	0	0.0634111	0.0675	0.1676	0.0745	0.0168	0.146	0.0426	0	0.0208	0.2618	0	0	0.0686	0.0635	0.0604	0.1487	0.25	0.0559	0	0	0	0.0961	0.0572	0.228	0.0078	0.0436444	0.0143	0	0.0252	0.0328	0.07904	0.0818	0.0744	0.0154	0.035	0	0.0651
IDS|90286|AP	0.2793	0.0189	0.1886	0.1423	0.0661	0.1315	0.1093	0.4452	0.1204	0.0541	0.0591	0.0761	0.0972	0.0782	0.4585	0.0387	0.1093	0.5985	0.0856	0.2277	0.8059	0.1615	0.415	0.2158	0.0174	0.4252	0.0496	0.031	0.358	0.3604	0.4859	0.2016	0.0082	0.012	0.3468	0.6297	0.2925	0.215	0.1478	0.0189	0.0472	0.2422	0.5518	0.6082	0.4839	0.0603	0.6453	0.4393	0.8746
CCDC36|64848|AT	0.1365	0.0897	0.0865	0.046	0.0139	0.0547	0.602	0.1567	0.0944	0.1608	0.0351	0.0495	0.0916	0.1608	0.1407	0.0306	0.1222	0.0995	0.1835	0.0115	0.1646	0.065	0.0501	0.0508	0.0842	0.0934	0.1043	0.0339	0.1388	0.0936	0.0632	0.0927	0.063	0.0571	0.0295	0.0359	0.1261	0.0742	0.0859	0.1992	0.11	0.0518	0.0313	0.0257	0.0969	0.0311	0.0917	0.0352	0.0645
ATP2C1|66756|AP	0.4898	0.4039	0.259	0.7644	0.1552	0.2593	0.2795	0.3867	0.4388	0.3731	0.4223	0.5082	0.6428	0.235	0.0684	0.0673	0.3113	0.8142	0.4777	0.8001	0.9234	0.2217	0.4871	0.9467	0.4759	0.635	0.2956	0.365	0.5981	0.1368	0.7127	0	0.422	0.7042	0.1411	0.6068	0.1661	0.399586	0	0.2851	0.6837	0.8527	0.7792	0.391189	0.3416	0	0.39553	0.0519	0.6975
PHLDB1|19040|ES	0.0772	0.1305	0.2141	0.0583	0.1629	0.0708	0.0461	0.1685	0.1131	0.0258	0.0832	0.1497	0.09959	0.1729	0.1236	0.1365	0.0702	0	0.1419	0.1046	0.17001	0.1125	0.0738	0	0.0656	0.0511	0.0221	0.2517	0.1377	0.1476	0.1743	0.1483	0.0599	0.2044	0.0979	0	0.105	0.10437	0.1325	0.073	0.1091	0.2295	0.1098	0.1716	0.1887	0.1198	0.1456	0.0633	0.034
RARA|40856|AP	0.141	0.0844	0.1404	0.1039	0.0836	0.2411	0.0981	0.1392	0.0545	0.1122	0.0589	0.1048	0.2523	0.0609	0.0478	0.1871	0.1352	0.0239	0.0833	0.2152	0.1146	0.161	0.123	0.1425	0.1765	0.1217	0.0839	0.1302	0.0687	0.1599	0.1502	0.3659	0.2171	0.0926	0.0531	0.4552	0.1397	0.2273	0.2139	0.1776	0.1443	0.1411	0.2741	0.5529	0.1918	0.0743	0.218	0.1889	0.4407
LPXN|16009|AP	0.1462	0.0283	0.1652	0.2391	0.1393	0.0395	0.1988	0.118	0.1357	0.0529	0.1047	0.2364	0.0319	0.0844	0.1954	0.1983	0.1052	0.5228	0.0365	0.4204	0.2935	0.308	0.1704	0.1061	0.0803	0.1098	0.215	0.1809	0.1024	0.09	0.1999	0.578	0.1061	0.1524	0.0745	0.0619	0.1232	0.0817	0.2087	0.0512	0.1544	0.0974	0.0519	0.1341	0.1061	0.3724	0.28	0.1544	0.3158
CD44|15127|ES	0.147	0.0013	0.1936	0.0001	0.0003	0.0107	0.0157	0.0481	0.0077	0.0139	0.0317	0.0881	0.2948	0.4605	0.0104	0.0045	0.0578	0.4717	0.6008	0.0154	0	0.3339	0.1561	0.2999	0.0013	0.049	0.0435	0.0238	0.4579	0.0431	0.1212	0.0275	0.1672	0.059	0.0053	0.048	0.1027	0.0697	0.0694	0.035	0.1281	0.0829	0.0281	0.0104	0.0913	0.3809	0.0684	0.0457	0.1563
ANGPT1|84860|AP	0.4531	0.1699	0.4956	0.2802	0.4178	0.185	0.4784	0.304	0.2991	0.4232	0.1462	0.4764	0.3842	0.2638	0.3115	0.5152	0.3463	0.3635	0.1158	0.0363	0.4003	0.4942	0.1705	0.0094	0.4011	0.4998	0.3135	0.685	0.1043	0.0872	0.2467	0.0615	0.2341	0.1668	0.1792	0	0.4107	0	0.1444	0.1064	0.1792	0.3454	0.1487	0.0154	0.0447	0.0172	0.0518	0.2765	0
PSAP|12067|AA	0.0959	0.1729	0.0349	0.3295	0.0562	0.0254	0.1356	0.1644	0.0809	0.1459	0.0188	0.0388	0.3878	0.1002	0.1016	0.1074	0.2309	0.0535	0.1608	0.1336	0.0831	0.1229	0.0546	0.6252	0.0436	0.022	0.3193	0.1567	0.0261	0.0767	0.0614	0.2805	0.0187	0.1331	0.0216	0.1565	0.2738	0.0907	0.1094	0.0568	0.0452	0.0537	0.0699	0.1249	0.1431	0.2318	0.058	0.0436	0.0831
DZIP3|66032|AP	0	0	0	0	0	0.2	0.0392	0	0	0	0.1667	0.27674	0.08879	0	0	0.09889	0	0.0488	0.1429	0.4	0.1538	0.06483	0.3846	0	0	0.1667	0.4286	0.0435	0	0	0.1176	0.09749	0	0.15578	0.05879	0.05323	0	0.18712	0.08526	0	0.04478	0.0909	0.13014	0.08288	0.22544	0	0.14981	0.1667	0.14435
ARHGAP27|41961|AP	0.39513	0.3817	0.2924	0.1966	0.37285	0.0769	0.4122	0.4928	0.2512	0.2651	0.1482	0	0.33044	0.439	0.0903	0.0422	0.4708	0.2733	0.0807	0.2023	0.3507	0.27725	0.3342	0.0818	0.2344	0.3945	0.30167	0.33484	0.2774	0.1469	0.3544	0.25143	0.40369	0.29543	0.1017	0.34073	0.2892	0.31721	0	0.3651	0.35287	0.4013	0.6101	0.1872	0.4201	0.0097	0.3301	0.2545	0.2157
PTK2|85303|AA	0.054	0.0082	0.0796	0.0693	0.0297	0.0531	0.0233	0.0414	0.0288	0.054	0.0639	0.0056	0.0081	0.0052	0.0408	0.0018	0.0355	0	0.0012	0.2773	0.2955	0.0118	0.0693	0.1385	0.0019	0.0999	0.0087	0.0082	0.064	0.0663	0.1977	0.0254	0.0049	0.0053	0.0513	0.0582	0.1075	0.0177	0.0911	0.0242	0.0383	0.0387	0.1076	0.3909	0.0826	0.0175	0.024	0.1035	0.2763
RGL1|9194|AP	0.0497	0.1753	0.0756	0.3735	0.0716	0.0941	0.0534	0.1087	0.1526	0.1436	0.2193	0.2784	0.7482	0.0517	0.4122	0.147825	0.1927	0.455	0.259	0.3976	0.0672	0.1601	0.3734	0.0975	0.3402	0.2423	0.3817	0.229	0.073	0.0171	0.0229	0.6836	0.5608	0.4827	0.2524	0.27452	0.1553	0.2448	0.2448	0	0.2448	0.1072	0.2411	0.237767	0.3507	0.1853	0.2276	0	0.4859
MARK3|29448|ES	0.1756	0.0441	0.0568	0.0452	0.2295	0.0684	0.1301	0.2511	0.045	0.2274	0.1222	0	0	0.1145	0.1245	0.0982	0.1729	0.2578	0.0605	0.0514	0.2385	0.1461	0.1081	0.0389	0.3213	0.1931	0.0907	0.2813	0.0233	0.2913	0.0614	0.1192	0.0386	0.1076	0.0626	0.1271	0.1387	0.1431	0.0372	0.1398	0.1586	0.0704	0.2246	0.0842	0.0844	0.1094	0.1905	0.2295	0.0501
COBLL1|55788|ES	0.053	0.1001	0.1372	0.0191	0.08195	0.0969	0.2291	0.1352	0.054	0.3312	0	0.0604	0.0849667	0.0541	0.4248	0.0973222	0	0.0969	0.3696	0.1752	0.3452	0	0.2109	0.102475	0.3003	0	0.0519	0.0281	0.1216	0.0986	0.2676	0.1252	0.05133	0.05494	0.0882778	0.0732143	0.5337	0.07355	0.0578	0.0623222	0.100967	0.1316	0.0842	0.4507	0.1453	0.3492	0.3265	0.0668	0.5436
ERBB2IP|72267|ES	0.1079	0	0.129688	0.0595	0	0.1248	0.1265	0.0388	0.1452	0	0.2024	0.203	0.04914	0.1011	0.139	0.151389	0	0.1762	0.1187	0.13475	0.0582	0	0.161812	0.1972	0	0.137	0.0759	0.2989	0.1732	0.2719	0.1006	0.110917	0	0.11899	0	0.1007	0.1789	0.1034	0.1356	0.09372	0	0.2487	0.09513	0.178167	0.13866	0.5928	0.1354	0.114978	0.4444
ZNF143|14317|AP	0.084	0.2364	0.2524	0.2286	0.0281	0.0409	0.1257	0.2691	0.0803	0.0935	0.0557	0.0522	0.2309	0.0955	0.0762	0.084	0.045	0.1865	0.1711	0.0935	0.0718	0.1055	0.2277	0.5622	0.0151	0.1209	0.1363	0	0.484	0.0332	0.3514	0.15807	0.0597	0.0812	0.0901	0.5361	0.1142	0.30142	0.0463	0	0.0557	0.1417	0.6611	0.7429	0.805	0.1383	0.4522	0.0438	0.95
HOPX|69364|AP	0.1413	0	0.45	0.0418	0.0744125	0.0077	0.2047	0.0785	0.127	0.123	0.0699556	0.0087	0.0950125	0.1158	0	0	0.3195	0.0148	0.0967333	0.0816667	0.183333	0.0746	0.1938	0	0.09847	0.08541	0.0984	0.2049	0	0.082	0.0262	0.3472	0.3293	0.1682	0	0.0475	0.2892	0.103089	0.0801333	0.232	0.0706667	0.1109	0.0803	0.1406	0.0153	0.0856667	0	0.3112	0.138412
CRLF2|88358|AT	0.2374	0.5092	0.4707	0.4892	0.30717	0.3934	0	0	0.5309	0.298	0.25781	0.27602	0.29008	0.6088	0.0275	0.3078	0.2286	0.1537	0.3416	0	0.0609	0.21059	0.257	0	0.27105	0.1291	0.1	0	0.1474	0	0.5309	0	0.6088	0.7217	0.3156	0.0886	0.0384	0.1819	0.4559	0	0.1474	0.4315	0.0634	0	0.6014	0.5386	0.418	0.20498	0.1239
SPIN2A|89298|AP	0	0.8324	0	0.0297	0.25678	0.0761	0.226	0.2681	0.0267	0.3796	0.2865	0.118	0	0.0411	0.2914	0.4786	0.5742	0.2661	0	0.0933	0.4313	0	0	0.0388	1	0.1199	0.0381	0.1498	0.1013	0.0859	0.0381	0	0.1394	0.175133	0.11	0	0.0819	0.7894	0.136937	0.2478	0.542	0.0554	0.1063	0.0165	0.0474	0.0789	0.0521	0.1327	0.0099
AMPD3|14347|AP	0.1782	0.0845	0.2548	0.4274	0	0.1788	0.5548	0.1234	0.2122	0.2712	0.0278	0.1222	0.116343	0.1054	0.2091	0	0.2943	0.1254	0.2512	0.1347	0.1285	0.618	0.1508	0.0533	0	0.1335	0	0.3801	0.028	0.1964	0.1839	0.5754	0.228	0.2496	0	0.128829	0.4506	0.1355	0.248311	0	0.149911	0.1946	0.2416	0.5904	0.0638	0.1547	0.4757	0.3263	0.3925
ITGA7|22211|AP	0.1152	0.1481	0	0.3372	0.104167	0	0.2101	0.2493	0.1996	0	0.2361	0.0905444	0	0.0574	0.3595	0	0.0823	0	0.4811	0	0.107978	0	0.0734	0.2658	0	0.3857	0.254	0.0443	0.372	0.0848	0.6138	0.7217	0.1028	0.09696	0.3218	0.10825	0.0836	0.1463	0.1481	0.100478	0.2456	0.3037	0.0783	0.347	0.1256	0.573	0.3358	0.1622	0.4016
OLFM2|47444|AP	0.1471	0.4864	0.1528	0.4928	0.16224	0.2017	0.0567	0.4079	0.1347	0.2017	0.16535	0.2191	0	0.4788	0.0382	0	0.3559	0.21825	0.14424	0.18295	0.19843	0.16656	0.17034	0	0.3147	0.1867	0.0219	0	0.15777	0.14904	0.1211	0	0.1681	0.14511	0.3512	0.6545	0	0.14022	0	0	0	0.1173	0.2798	0.15702	0.4571	0	0	0	0.15147
CCSER2|12409|ES	0.0473	0.1803	0.1128	0.1474	0.145	0.0635	0.1405	0.1317	0.0942	0.0949	0.2687	0.1602	0.2028	0.1345	0.1999	0.145	0.2329	0.4709	0.0758	0.027	0.2762	0.0871	0.0598	0.2288	0.0422	0.1561	0.1128	0.1324	0.145	0.0612	0.0923	0.1036	0.2275	0.1181	0.2252	0.379	0.131	0	0.0983	0.0462	0.2338	0.1098	0.1218	0	0.3229	0.1645	0.1548	0.1051	0.16044
FAM65B|75537|AP	0.3475	0.0749	0.04914	0	0.1265	0	0.072	0	0	0.0156	0.0905	0.0412	0.0507857	0	0.08522	0.0534571	0.6727	0.1926	0	0.106675	0.1082	0.0433	0	0.0556625	0.0884444	0.0643	0.0851	0.3117	0	0	0	0.3202	0.07097	0	0.0789	0.0499	0.0505	0.0414143	0.0668143	0.07824	0.0314111	0.0079	0	0.0934667	0.0281	0.0755125	0	0.05389	0.0431333
RPS6KA1|1281|AP	0.305	0.6253	0.1919	0.1324	0.3442	0.355	0.1272	0.4855	0.3418	0.3892	0.3966	0.0569	0.4797	0.2229	0.1995	0.1653	0.2628	0.4476	0.3084	0.3126	0.0514	0.0494	0.3251	0.1485	0.1248	0.3878	0.162	0.1282	0.4722	0.0623	0.385	0.0231	0.2067	0.3293	0.2171	0.3038	0.2605	0.3292	0	0.3336	0.4165	0.2289	0.402	0.4212	0.5096	0.0618	0.5783	0.183	0.1439
PTPRC|9321|AT	0.0614	0.0173	0.1071	0.0551	0.0385	0.0243	0.1312	0.0423	0.0421	0.0277	0.02	0.0542	0.0187	0.0215	0.0891	0.0515	0.0751	0.4983	0.0218	0.2034	0.3145	0.0833	0.0683	0.0759	0.112	0.0373	0.0561	0.0994	0.0365	0.0409	0.048	0.1317	0.0523	0.0218	0.0145	0.0202	0.1075	0.0333	0.0841	0.0202	0.0086	0.0502	0.0378	0.109	0.0324	0.1116	0.0598	0.0512	0.0786
CD44|15143|ES	0.6887	0.2111	0.2429	0.1293	0.0328	0.0917	0.3552	0.3077	0.7484	0.1538	0.442	0.8078	0.36	0.8001	0.3076	0.0851	0.3827	0.5971	0.5451	0.8533	0.3477	0.7791	0.3567	0.8146	0.0322	0.1393	0.4211	0.4363	0.1767	0.5915	0.6541	0.896	0.6671	0.1632	0.8233	0.5184	0.2194	0.4773	0.6256	0.5237	0.7854	0.3329	0.3972	0.1471	0.4941	0.8716	0.1413	0.6921	0.6267
LIMK1|80060|AP	0.1633	0.2651	0.0352	0.1052	0.1359	0.2148	0.0045	0.4288	0.1175	0.2416	0.3524	0.045	0.1587	0.0918	0.0825	0.1188	0.063	0.0783	0.1072	0.045	0	0.0433	0.124	0.1337	0.1138	0.1307	0.0367	0.0621	0.3103	0.2206	0.1608	0.0489	0.0519	0.0433	0.1693	0.2071	0.014	0.1337	0.0221	0.0592	0.0862	0.114	0.1885	0.2046	0.1901	0.0458	0.197	0.1096	0.2899
PHLDB2|66062|AT	0.1553	0.0676	0.1416	0.0177	0.0128	0.023	0.1319	0.1307	0.0842	0.1052	0.0673	0.0226	0.041	0.028	0.0849	0.0579	0.0859	0.339	0.0216	0.0369	0.2531	0.3743	0.4371	0.0579	0.0441	0.0426	0.0149	0.0446	0.2763	0.3915	0.0505	0.2314	0.0817	0.0175	0.0138	0.0068	0.3856	0.0778	0.0548	0.0317	0.0696	0.0294	0.102	0.1724	0.0338	0.0629	0.0757	0.1109	0.0522
SRBD1|53457|AP	0	0.1774	0	0.1032	0.028	0.1393	0.0192	0.1133	0	0.1472	0.2871	0.06364	0.07423	0.1012	0.0099	0.06702	0.3929	0.5017	0	0.0659778	0.3367	0	0.1017	0.1393	0	0.0952	0	0.0404	0	0.1356	0.05475	0.07028	0.07231	0.07196	0.08699	0.0898444	0.08076	0.0642667	0.06948	0.1472	0.04881	0.0377	0.12246	0.107344	0.1978	0	0.07214	0.06013	0.083725
PRRG1|88777|AT	0.0791	0.0923	0.0562	0.1255	0.1151	0.0841	0.1066	0.1311	0.0728	0.1024	0.0193	0.0258	0.1405	0.0407	0.1148	0.0934	0.051	0.2189	0.2471	0.3948	0.1105	0.179	0.0606	0.3051	0.0831	0.1076	0.0712	0.0452	0.0738	0.0784	0.1631	0.0731	0.2932	0.1302	0.0732	0.1523	0.0984	0.1777	0.2443	0.1357	0.0783	0.1509	0.2095	0.4807	0.1997	0.1015	0.2771	0.2133	0.3165
MCF2L|26320|AP	0.2418	0.17	0.1321	0.3812	0.0561	0.0599	0.1543	0.3093	0.2285	0.0922	0.1403	0.1174	0.217586	0.0932	0	0.125317	0.0471	0.041	0.3907	0.0784	0.0095	0.345	0.2726	0.2644	0.2363	0.0577	0.1782	0.0598	0.2765	0.219	0.1678	0.6046	0.5785	0.0843	0.6506	0.286667	0.3377	0.3671	0.0602	0.18694	0.177689	0.3741	0.2584	0.7007	0.1805	0	0.1486	0.2264	0.2357
FLVCR2|28507|AP	0.0624	0.1206	0	0.0543	0	0.2229	0.0117	0.0968	0.1073	0.0379	0.0322	0	0	0.1067	0.139	0.2052	0.0622	0.1569	0.0592	0	0.9117	0	0.2012	0	0.1265	0.1834	0.0261	0.0325	0.1137	0.0272	0	0.0329	0	0.0953	0.0501	0.2366	0	0	0	0.0491	0.0755	0.0403	0.389	0	0.0622	0	0.1428	0	0.05532
PHLDB2|66058|AP	0.089	0.1351	0	0.3166	0.1438	0.1412	0.2893	0.045	0.1197	0.0975	0.0505	0.0836	0.18333	0.2783	0.4945	0.25984	0.1252	0.2549	0.064	0.0156	0.0858	0.20512	0.20535	0.0849	0.19171	0.1026	0.0328	0.4808	0.23297	0.20246	0.3999	0.14012	0.16564	0	0.0303	0.1397	0.20536	0.15634	0.289	0.22601	0.239233	0.0655	0.0607	0	0	0.23957	0.19684	0.20094	0.16214
HYAL2|65005|RI	0.0775	0.1664	0.2346	0.0312	0.2691	0.0459	0.0076	0.072	0.2437	0.0338	0.052	0.052	0.05133	0.0191	0.0604	0.0843	0.075	0.6235	0.0605	0.0498	0.762	0.0315	0.313	0.0878	0.0651	0.0524	0.0318	0.0287	0.0299	0.0173	0.1092	0.0432	0.1772	0.0176	0.0473	0.0493	0.0442	0.0131	0.0866	0.1813	0.3934	0.0206	0.049	0.0277	0.1098	0	0.0598	0.1238	1
MGAT1|75022|AP	0.448	0.4161	0.0994	0.1673	0.2459	0.3514	0.256	0.3792	0.2828	0.3218	0.4253	0.1843	0.1104	0.4582	0.2075	0.2938	0.2921	0.3936	0.3525	0.1641	0.1071	0.0992	0.304	0.2191	0.2676	0.4128	0.2241	0.2382	0.4929	0.3019	0.4113	0.0953	0.4656	0.1761	0.1426	0.1883	0.1453	0.2027	0.135	0.3771	0.3979	0.1303	0.3028	0.29	0.333	0.163	0.1248	0.1894	0.0845
LNPEP|72875|AP	0	0.0582	0	0.0089	0	0	0	0	0.0463	0.0591	0	0	0.07983	0.0551	0	0	0.1044	0.2201	0	0.1072	0.2389	0.1936	0.1695	0.0599	0.1053	0.0893	0	0	0	0	0	0	0.09477	0	0	0	0	0.05408	0	0	0.06597	0.0755	0	0	0	0	0	0	0
CHID1|13801|AP	0.0299	0.0481	0.0101	0.1812	0	0.0234	0.0189	0.038	0.0163	0.0132	0.1642	0.0169	0	0.0299	0.0113	0	0.0194	0.1637	0.0174	0.0664	0.2463	0	0.0216	0.0352	0	0.0405	0.011	0.0402	0.0558	0.028	0.0449	0.007	0	0	0	0	0	0	0	0.0633	0	0.0084	0.0383	0	0.0187	0.0124	0	0	0
KDM4C|85833|ES	0.0115	0.0247	0.1481	0.1326	0.2887	0.0487	0.0846	0.0326	0.016	0.0301	0.0066	0	0.1039	0.0602	0.2842	0.0945	0.121	0.5745	0.0108	0.2581	0.7509	0.016	0.0676	0.1481	0.0058	0.0955	0.065	0.0156	0.3114	0.237	0.347	0.0359	0.0548	0.04065	0.0372	0.261133	0.1753	0.196263	0.1266	0.0213	0.0921	0.3168	0.1882	0.8	0.3575	0.0473	0.3275	0.1266	0.6898
MFAP3L|71160|AT	0	0.1569	0.0253	0.5571	0.0655	0.0604	0	0.0572	0.105	0.0857	0	0	0.8313	0	0.2625	0.0982	0.0521	0.1449	0.5445	0	0.1329	0	0	0.3105	0.391	0.0927	0.0501	0	0.1959	0.1361	0.2268	0.1729	0.3398	0.2668	0.1184	0.4595	0.2028	0.2832	0.0227	0	0.2063	0.0367	0.0777	0.4341	0	0.2356	0.0972	0.1995	0.669
WBP1L|12980|AP	0.0851	0.0199	0.0315	0.3526	0.0136	0.0681	0.08	0.0426	0.036	0.0645	0.0456	0.1972	0.0568	0.1266	0.3023	0.0545	0.0266	0.6883	0.1653	0.0928	0.7598	0.0529	0.1373	0.0652	0.042	0.1375	0.0521	0.0824	0.0401	0.1653	0.1435	0	0.0996	0.0417	0.0125	0	0.0231	0.04975	0	0.0193	0.0256	0.0201	0.0851	0	0.0426	0.031	0	0	0.2774
BEAN1|36708|AT	0.0628	0.0128	0.1297	0.0265	0.1179	0.0193	0.0986	0.0943	0.0463	0.0461	0.0721	0.0539	0.0576	0.0389	0.2277	0.0196	0.031	0.3324	0.2922	0.071	0.3937	0.2026	0.0772	0.3368	0.0377	0.1294	0.0308	0.0305	0.0443	0.0209	0.0432	0.1367	0.0136	0.0143	0.256	0.0738	0.0852	0.0148	0.026	0.0064	0.0282	0.0184	0.0725	0.0937	0.0296	0.0059	0.2115	0.0223	0.2393
WNT2B|4199|AP	0.082	0.2268	0.1228	0.0878	0.4866	0	0.5338	0.0621	0.3698	0.1489	0.1858	0.3392	0.634	0.495	0.0139	0.278	0.0816	0.0916	0.8899	0	0	0.3392	0	0.1228	0.137478	0	0	0.4026	0	0.0288	0.0735	0	0.156356	0.3392	0	0	0.1335	0	0	0	0.2188	0.041	0.0866	0	0	0.1181	0	0	0
PLEKHA1|13354|ES	0.0299	0.0386	0.0587	0.1286	0.2211	0.0353	0.0507	0.0465	0.0328	0.1307	0.0726	0.0224	0.0195	0.0404	0.0562	0	0.0656	0.4403	0.016	0.0105	0.3651	0.0332	0.0558	0	0.0566	0.0599	0.0498	0.0671	0.0272	0.0403	0.1035	0	0.042	0.0461	0.0387	0.0555	0.0595	0	0.0217	0.0099	0.0403	0.0917	0.1847	0.0422	0.1569	0	0.0231	0.082	0.07409
DOCK9|26172|AP	0.245	0.1746	0.3664	0.19	0.3058	0.22668	0.1489	0.2625	0.0829	0.2701	0.4468	0.4303	0.408311	0.1712	0.3225	0.1571	0.1891	0.2375	0.2202	0.081	0.2858	0.4485	0.04	0.1588	0.0992	0.4819	0.3163	0.3216	0.2625	0.1312	0.1323	0.2612	0.2491	0.21087	0.20615	0.163822	0.3314	0.229738	0.1805	0.0451	0	0.2207	0.358	0.6982	0.25699	0.065	0.22183	0.0941	0.322475
ACAP1|38919|AP	0.1589	0.041	0.1501	0.4694	0.0891	0.0505	0.425	0.0826	0.1567	0.2141	0	0.1721	0.4217	0.1587	0.254	0.2687	0.182	0.2557	0.1364	0.4701	0.7014	0.153	0.229	0.2127	0.3322	0.0764	0.2892	0.3943	0.0647	0.0761	0.2559	0.0997	0.2774	0.1072	0.1532	0.164	0.3888	0.153	0.2506	0.2632	0.0564	0.0931	0.1864	0.1427	0.0707	0.2411	0.2118	0.2082	0.1824
PYHIN1|8390|AT	0.1247	0.4539	0.2041	0.3606	0.3153	0.5414	0.2117	0.4335	0.2751	0.3541	0.2498	0.1308	0.5787	0.4124	0.1902	0	0.2063	0.0771	0.3579	0.0699	0.1349	0.0693	0.1677	0.164	0.1841	0.1815	0.3065	0.1071	0.2791	0.146	0.2295	0.0335	0.4744	0.3001	0.5886	0.5157	0.0583	0.4179	0.2122	0.3309	0.5613	0.4249	0.3929	0.2645	0.5913	0.2004	0.3705	0.3026	0.276
NGLY1|63751|AP	0.0249	0.1796	0.0591	0.0618	0.0319	0.0125	0	0.0587	0.0868	0	0.0726	0.0464	0.485	0.0461	0.0945	0.0409	0.0335	0	0.0445	0.3872	0	0.0271	0.1245	0.1544	0	0.0651	0.0814	0.0249	0.3233	0.0832	0.1561	0.1132	0.045	0.0183	0.0298	0.7209	0.1181	0.115667	0.0304	0	0.0304	0.1309	0.1801	0.6573	0.2539	0.1189	0.1801	0.1692	0.9051
GJD3|40861|AT	0	0.0514	0.1578	0.1324	0	0	0.0762	0.2133	0.1641	0.0468	0	0.0644	0.0866	0.0412	0	0.34	0	0.0821	0.1578	0.0791	0.103056	0.0643	0.05925	0.0154	0.0934	0	0	0	0	0.462	0.0355	0	0.1578	0.021	0.0332	0.0237	0.2557	0.0271	0	0.111	0	0.1898	0.0286	0.0514	0.0286	0.049	0.0614	0	0
ARHGAP22|11482|AP	0.3859	0.3631	0.1952	0.1415	0.3847	0.1254	0.5017	0.2516	0.1446	0.2395	0.0696	0.18401	0	0.1203	0.0861	0.20515	0.3571	0.0431	0.251	0.2206	0.164367	0.18159	0.20978	0.0588	0.0332	0.127	0.1624	0.2723	0.1611	0.2146	0.0945	0.2508	0.5676	0.5357	0.4055	0.5634	0.4268	0.3624	0.4692	0.1928	0.1298	0.3632	0.1549	0.4483	0.0733	0.0937	0.0817	0.3032	0.0956
ACTN1|28118|ES	0.0745	0.0907	0	0.1456	0.5041	0.1238	0.0946	0	0	0	0.2171	0.1384	0.07255	0	0.2229	0	0.1965	0	0.0867	0.09142	0	0.0888	0.1252	0.1925	0	0.0541	0.0852	0.0567	0	0.0491	0.1119	0.2399	0.23	0.0763	0.0672	0	0.0834	0.1077	0.107	0.0995	0.2649	0.0818	0	0	0.0646	0	0.2051	0.0782	0.0863667
ANK2|70397|ES	0.0476	0.2352	0.15646	1	0.1036	0.1109	0.0999	0.1083	0.0847	0.1472	0.0314	0.09312	0.184337	0.0289	0.4343	0.5975	0.1324	0.1646	0.0232	0.773	0.2357	0.147814	0.0237	1	0.1768	0.535	0.6873	0.111	0.19563	0.2086	0.314	0.144533	0.0827	0.0526	0.230422	0.286712	0.1218	0.13448	0.1528	0.3362	0.146471	0.2834	0.4057	0.354171	0.2498	0.32944	0.2762	0.0226	1
APOC2|50375|RI	0.0706	0.0344	0.8124	0.0687	0.2438	0.107	0.9855	0.1439	0.45	0.2951	0.1956	0.2376	0.0216	0.2357	0.6706	0.5991	0.066	0.7428	0.6055	0.5029	0.5064	0.7149	0.4438	0.3691	0.6245	0.2065	0.4423	0.5137	0.074	0.4093	0.387	0.6552	0.0277	0.1363	0.0997	0.0467	0.2816	0.631	0.6783	0.1119	0.3842	0.112	0.0776	0.1904	0.1267	0.7883	0.4893	0.2878	0.7735
FILIP1L|65811|AT	0.0635	0.0623	0.0739	0.1401	0.1741	0.0383	0.0581	0.1498	0.1332	0.0617	0.0515	0.019	0.0496	0.0184	0.1051	0.0766	0.0229	0.3293	0.04	0.1766	0.1328	0.0705	0.0504	0.0697	0.0531	0.0705	0.0489	0.0173	0.0497	0.0313	0.0674	0.0574	0.0124	0.0148	0.0653	0.048	0.0726	0.0465	0.0337	0.0257	0.0367	0.0475	0.0518	0.1116	0.0521	0.1135	0.0633	0.0279	0.1281
FYN|77271|AP	0.0741	0.0547	0.1777	0.1132	0	0.314	0	0.1556	0.0248	0.0484	0	0.0585889	0.0626111	0.0937	0	0	0.1042	0.09	0.1216	0	0.2041	0	0.2663	0.0814	0	0.142	0.0493	0	0.0419	0.0834	0	0	0.0697	0	0.2208	0	0	0.07069	0.07285	0	0	0.2994	0.1765	0.3523	0.0805	0	0	0	0.08751
KIF3C|52880|ES	0.4395	0.066	0.7055	0.0883	0.1079	0.4207	0.1865	0.3034	0.1865	0.0215	0.24988	0.5665	0.28397	0.1085	0.0904	0	0.4207	0.7117	0.2663	0.5335	0.67633	0.7531	0.39492	0.2019	0.0775	0.0602	0.0545	0.0801	0.4656	0.1055	0.6234	0.9216	0.3836	0.1833	0.5311	0.2463	0.3999	0.7968	0.2531	0.3034	0.0199	0.2932	0.4656	0.495	0.1609	0.0454	0.1585	1	0.2373
TCF12|30783|AP	0	0.0794	0.0816	0.0362	0.0334	0.0615	0.0472	0.0408	0.0718	0.2315	0.0555	0.1774	0.2308	0.0432	0.1621	0.0426	0.0513	0.4121	0.0097	0.3361	0.6643	0	0.0816	0.0881	0.3019	0.5392	0.0241	0.1948	0.1011	0.0162	0.2177	0	0.1009	0	0	0	0.1195	0.0934444	0	0.0696	0.0367	0.0513	0.0304	0.2254	0.067	0.0406	0.3624	0	0.1587
DYNC1I2|55943|ES	0.0161	0.0298	0.1505	0.0257	0.0143	0.1346	0.1746	0.0102	0.0557	0.0231	0.3218	0.2214	0.3109	0.026	0.0432	0.0789	0.0283	0.0303	0.0654	0.4971	0.4875	0.1737	0.0518	0.0526	0.0162	0.0601	0.0377	0.045	0.0269	0.0161	0.0783	0.0215	0	0.3101	0.0484	0.0487	0.0536	0.0194	0.1178	0.0682	0.0334	0.0484	0.2224	0.0589	0.0627	0.1146	0.124	0.0815	0.0637
BLOC1S6|30440|ES	0.0347	0.0942	0.0588	0.1377	0.0569	0.0576	0.0775	0.0567	0.021	0.0729	0.1184	0.0098	0.0272	0.0303	0.1438	0.0325	0.036	0.3796	0.0987	0.4437	0.4178	0.0775	0.1365	0.4394	0.1106	0.1353	0.1559	0.042	0.1532	0.1514	0.1342	0.1184	0.0296	0.0518	0.0638	0.4283	0.075	0.6018	0.1106	0.1228	0.0341	0.1904	0.3093	0.8614	0.2514	0.2187	0.2118	0.1299	0.5733
TMEM130|80590|AP	0.5836	0.7104	0.4658	0.4865	0	0.4604	0.412	0.5346	0.3096	0.5522	0.7969	0.671133	0.3291	0.4335	0.3066	0.6468	0.4884	0.0874	0.2319	0.588	0	0.6738	0.3857	0	0	0.4343	0.4397	0.8082	0.2464	0	0.4999	0.4337	0.6624	0.179	0	0.1311	0.4488	0	0	0.2464	0.38856	0.5667	0.4705	0.2887	0.3634	0.164	0.146	0.3876	0
PCED1A|58556|AP	0.127	0.1053	0.0931	0.0853	0.1891	0.1971	0.1088	0.0798	0.0614	0.1582	0.1248	0.1285	0.0895	0.2657	0.1096	0.2286	0.1103	0.2124	0.0955	0.118	0.202575	0	0.0874	0.1105	0.258	0.2594	0.3519	0.162	0.2627	0.0404	0.0999	0.0179	0.2308	0.0941	0.1196	0.1754	0.0576	0.1436	0.0988	0.1401	0.5167	0.0896	0.0808	0.0842	0.1327	0.198	0.1541	0.1299	0.2731
MYO18A|40038|ES	0.2222	0.0699	0.1325	0.4256	0.3692	0.11	0.1656	0.2894	0.2335	0.1796	0.093	0.1639	0	0.0894	0.3566	0.2029	0.4251	0.5612	0.1544	0.0833	0.2141	0.2063	0.2029	0.1807	0.4543	0.193	0.2034	0.1828	0.2431	0.6312	0.2151	0.2068	0.1807	0.3775	0.0952	0.0584	0.1916	0.1204	0.1129	0.2093	0.1483	0.1689	0.3249	0.2169	0.1768	0.0519	0.2856	0.0764	0.1307
SEPT11|69618|AT	0.1163	0.0887	0.16	0.0885	0.072	0.0912	0.0276	0.1165	0.0865	0.0678	0.0755	0.0662	0.0935	0.0721	0.0557	0.0795	0.0998	0.2937	0.0468	0.0134	0.287	0.1034	0.1024	0.0355	0.0348	0.0674	0.0389	0.16	0.1005	0.0844	0.0813	0.0511	0.0758	0.0384	0.0987	0.0422	0.0846	0.0195	0.044	0.0294	0.0315	0.0335	0.064	0.0548	0.0577	0.0328	0.0611	0.0678	0.0398
SORBS2|71370|AP	0.1173	0.1253	0.0362	0	0.0151	0.10822	0.0144	0.0267	0	0.0108	0.2269	0	0.0936778	0.2795	0.2038	0.11032	0.043	0.1282	0.07843	0.1019	0.1006	0.019	0.1128	0.2016	0.1324	0.1067	0.0315	0.0211	0.5743	0.0913	0.0624	0.0454	0.10352	0	0.1032	0.1345	0.0985	0.1343	0.1491	0.06185	0.0977889	0.0136	0.1412	0.0374	0.1545	0.0731	0.0282	0	0
VPS39|30131|ES	0.4444	0.1951	0.0658	0.0803	0.0204	0.0159	0.4211	0.1432	0.0815	0.2466	0.12	0.053	0.189089	0.5617	0.1816	0.56	0	0.1538	0.8107	0.5568	0.2254	0.172	0.2062	0.56	0.0678	0.3323	0.1391	0.0666	0.10985	0.1081	0.2029	0.0833	0	0.3038	0.0571	0.128278	0.3478	0.187	0.0494	0.12914	0.177733	0.2513	0.20538	0.1714	0.1951	0.2062	0.2878	0	0.21711
SPAG9|42494|ES	0.2039	0.1916	0.2518	0.555	0.4224	0.2339	0.2979	0.1402	0.125	0.3318	0.2209	0.2573	0.3915	0.2076	0.2415	0.1334	0.4169	0.3675	0.0669	0.1477	0.3311	0.2183	0.2193	0.1681	0.0761	0.235	0.3338	0.2805	0.171	0.3032	0.2725	0.0979	0.2814	0.2819	0.1239	0.1942	0.1852	0.2989	0.178	0.2573	0.0445	0.1137	0.2889	0.217	0.2953	0.1436	0.2259	0.1577	0.156
HOXB3|42196|AP	0	0	0	0.135	0.04536	0.2992	0	0.21	0.0589	0.0307	0	0	0	0.0506	0.0036	0.2708	0.117	0.149	0.0535	0	0.1077	0.0855	0	0.0206	0.2634	0.0376	0	0	0	0	0.0153	0.0319	0.04397	0	0	0	0	0	0	0.0477	0	0.1178	0	0	0.0539	0	0.0068	0	0.0104
ZNF195|13979|ES	0.2466	0	0.6691	0.252	0.2029	0.3847	0.2676	0.4715	0.0102	0.4946	0.2115	0.0657	0	0.289	0.2641	0.3297	0.3918	0.48991	0.0823	0.6676	0.50561	0.7054	0.2641	0.6878	0.729	0.79	0.5479	0.0567	0.5038	0.5499	0	0.619	0.1358	0.0206	0.1885	0.6712	0.2845	0.8851	0.6825	0.1281	0.3251	0	0.4244	0.8633	0.7432	0.8828	0.5004	0	0.8609
NMT2|10868|RI	0.0856	0.0856	0.0627	0.0101	0.0763	0.1231	0.4503	0.2684	0.0942	0.0191	0.0784	0	0.13897	0.0105	0.0348	0.08315	0.211	0.1276	0.10773	0.27336	0.6519	0.13053	0.17508	0.28433	0.06713	0.0753	0.0627	0.0268	0.21869	0.2263	0.1722	0.2506	0.3188	0.09123	0.14027	0.31664	0.2598	0.25137	0.12874	0.10908	0.0408	0.0447	0.208	0.4885	0.27394	0.211	0.24145	0.1897	0.56612
WNT9B|42038|AT	0	0.0484	0.1561	0	0	0.0687	0.0693	0.155	0.085	0.0946	0.1519	0	0	0.0397	0.012	0.1689	0.3665	0.0146	0	0	0.0414	0.1903	0	0	0	0	0.0555	0.3916	0.0629	0.0648	0.0169	0.029	0	0	0	0	0.0241	0	0	0	0	0	0	0.0626	0	0	0	0	0
SNED1|58306|AT	0.1007	0.143	0.1567	0.1397	0.0841	0.1087	0.0935	0.2452	0.1661	0.1014	0.1652	0.0481	0.1062	0.0487	0.1728	0	0.0966	0.225	0.0845	0.1402	0.1141	0.0724	0.158	0.0779	0.0409	0.1274	0.2298	0.0971	0.0751	0.1081	0.1017	0.1022	0.0975	0.0663	0.2797	0.2006	0.0825	0.114	0.0824	0.0431	0.0492	0.1362	0.13	0.1241	0.1109	0.25	0.0526	0.0936	0.0247
STARD10|17643|AP	0.0414	0.0162	0	0.8952	0.09867	0.1274	0.1076	0.041	0.0246	0.1129	0.0116	0.1052	0.09786	0.0603	0.4563	0.0383	0.0173	0.864	0.1678	0.0223	1	0.018	0	0.2679	0.0331	0.1584	0.0744	0.0139	0.0384	0.0801	0.067	0.009	0.0435	0.0131	0.1025	0.0224	0.1192	0	0.023	0	0.0979	0.0503	0.0264	0.0084	0.0916	0.1994	0.0644	0.4318	0
SMARCC2|22392|ES	0.5045	0.3603	0.9094	0.4227	0.494	0.6899	0.3482	0.5918	0.2354	0.2596	0.5308	0.3176	0.316411	0.5079	0.2382	0.4636	0.6992	0.400922	0.8968	0.7024	0.486687	0.3571	0.8459	0.7342	0.0878	0.7463	0.7462	0.3764	0.5999	0.1684	0.3251	0.7929	0.286333	0.6628	0.399033	0.4441	0.5739	0.7278	0.6053	0.4052	0.2502	0.1808	0.5673	0.455	0.2653	0.7364	0.1952	0.6313	0.473513
ERBB2IP|72263|ES	0.2456	0.4138	0.429533	0.2134	0.0455	0.5732	0.6036	0.1174	0.1428	0.4903	0.6411	0.6745	0.6559	0.258	0.0903	0.6135	0	0.4504	0.5237	0.6596	0.4467	0.17	1	0.5879	0.073	0.4417	0.4548	0.0447	0	0.3524	0.4285	0.6564	0.0288	0.5278	0.5661	0.370312	0.4324	0.432262	0.34231	0.2941	0.0757	0.3179	0.31271	0.363533	0.5216	0.7249	0.5906	0.7558	0.32581
RGS12|68637|AP	0.1439	0.4589	0	0	0	0	0	0.2468	0.1353	0.0488	0.543	0.402	0.4946	0	0.0235	0	0.0538	0.1089	0.6697	0	0.1377	0.124	0.1827	0.194	0	0.1541	0	0.1671	0.1529	0.1051	0.0676	0	0.55	0.2294	0.1089	0.1233	0.1045	0	0	0	0.1205	0.1103	0.1679	0	0.0614	0	0.124	0	0.1505
CSGALNACT1|82880|ES	0.2149	0.0944	0.0989	0.061	0.0488	0.1314	0.0654	0.1436	0.1353	0.0773	0.105	0.105	0.14627	0.1171	0.2115	0.0905	0.1028	0.6427	1	0.2383	0.3554	0.244	0.3194	0.2604	0.0759	0.2383	0.2561	0.1091	0.3922	0.2089	0.0994	0.2694	0.10121	0.2812	0.1732	0.4474	0.1543	0.32116	0.1323	0.16956	0.5136	0.2604	0.1636	0.7012	0.3456	0.1353	0.3891	0.451	0.6787
ACSL6|73248|AT	0.1609	0	0	0	0.9166	0.0991	0.2526	0	0.0572	0	0	0.4862	0	0	0.2144	0.2945	0.1376	0	0	0.0984	0	0	0.1507	0.3949	0	0.0519	0.0249	0.3312	0.0567	0.2587	0.1343	0	0	0.5908	0.177	0.5156	0.1152	0	0	0	0	0.2144	0.0991	0	0.323	0	0.3868	0	0.6697
UBE3B|24310|ES	0.0472	0.0144	0.0265	0.0533	0	0.0348	0.0289	0.0682	0.0138	0.0312	0.0381	0	0.0305	0.0272	0.0089	0.1196	0.0374	0.222	0.0265	0.1427	0.1249	0	0.0298	0.1485	0.0156	0.028	0.0156	0.0161	0.1286	0.078	0.0238	0.0251	0	0.0138	0.0636	0.1475	0.0976	0.0181	0.0173	0.0353	0.0609	0.0362	0.1369	0.3223	0.1452	0.0183	0.2153	0.0502	0.526
COMMD5|85672|AP	0.1958	0.1434	0.0297	0.3	0.1164	0.1121	0.0907	0.1261	0.216	0.1381	0.2254	0.0648	0.0966	0.103	0.138	0.0222	0.0813	0.2029	0.0657	0.2041	0.4044	0.1035	0.0865	0.1231	0.0649	0.1183	0.0579	0.0817	0.2739	0.3018	0.1482	0.0804	0.1099	0.0822	0.0876	0.188	0.1116	0.0717	0.0897	0.1121	0.1186	0.1091	0.1658	0.1731	0.2409	0.1258	0.1302	0.1426	0.4807
CLDN11|67616|AT	0.3459	0.4636	0.273	0.0972	0.1135	0.3656	0.2308	0.1963	0.3321	0.449	0.4501	0.4939	0.6179	0.4168	0.3634	0.4605	0.3794	0.0453	0.3354	0.5506	0.0321	0.192	0.0875	0.3606	0.8935	0.7129	0.5298	0.4059	0.149	0.1828	0.2294	0.3174	0.2984	0.0806	0.1542	0.142	0.316	0.518	0.1672	0.381	0.2061	0.2389	0.8047	0.1226	0.3083	0.1161	0.241	0.2769	0.0802
PTK2B|83157|RI	0.121	0.0533	0.0481	0.0757	0.0154	0	0.1889	0.06	0.024	0.0456	0.0184	0.0161	0.2573	0.0239	0.2908	0.04492	0	0.2681	0.0657	0.3193	0.1197	0.115	0.0779	0.0977	0.0261	0.1944	0.0899	0.0201	0.1436	0.071	0.0934	0	0.0072	0	0	0.11766	0.0468	0.04328	0	0	0.0566	0.1527	0.1012	0.3768	0.2214	0.0288	0.3686	0.1112	0.5581
DIXDC1|18709|AT	0.1389	0.2971	0.0854	0.3503	0.0396	0.0325	0.2536	0.1262	0.2028	0.1351	0.0464	0.069	0.2609	0.1523	0.1223	0.2668	0.0903	0.1094	0.1615	0.3937	0.0652	0.0207	0.0829	0.1894	0.3201	0.4481	0.1352	0.0294	0.094	0.1042	0.0779	0.2603	0.1149	0.1039	0.0127	0.1219	0.3429	0.2267	0.065	0.0478	0.3106	0.1101	0.4297	0.1757	0.2068	0.1279	0.0807	0.1212	0.4019
TBXAS1|81971|ES	0.1038	0.0781	0.3868	0.2782	0.3025	0.0992	0.1099	0.1581	0.1481	0.0519	0.0695	0.0487	0.0527	0.0568	0.4764	0.0731	0.1251	0.7312	0.2488	0.6755	0.5013	0.1723	0.5419	0.1253	0.0984	0.1571	0.1387	0.057	0.3673	0.2859	0.2773	0.1737	0.0792	0.0788	0.3531	0.6543	0.2065	0.5034	0.3716	0.271	0.2619	0.2159	0.2526	0.4409	0.3319	0.2828	0.3404	0.2128	0.256
SORT1|4009|AP	0.156	0.0472	0.0375	0.0447	0	0.0311	0	0.0748	0.13	0.0309	0.1245	0.0151	0	0.079	0.0053	0.017	0.0494	0.6976	0.0494	0.07044	0.5842	0	0.0739	0.0483	0	0.0362	0.012	0.0322	0.1168	0	0.0202	0	0.0153	0	0.3185	0.03729	0.0247	0.04386	0	0.04664	0	0.0571	0.0494	0.07688	0	0	0	0	0.06651
UBAP2|86129|AP	0.3715	0	0	0.1442	0.4064	0.2457	0.2503	0.0973	0.2045	0.1403	0.2212	0.27	0.249	0.2442	0.2124	0.5153	0.195	0.1409	0	0.1171	0.0629	0.2117	0.2275	0.1026	0.1958	0.2245	0.2853	0.5173	0.2886	0.0874	0.0991	0.1416	0.1545	0.3228	0	0	0	0	0.1305	0.2337	0.1628	0.311	0	0	0	0.1491	0	0.193	0
C1QTNF6|62088|AP	0.1579	0	0.1765	0.0164	0.0066	0.0295	0	0.0968	0.12	0	0.03682	0	0.03169	0	0.04	0.0353	0.1	0.120889	0.03418	0	0.0789	0.03252	0.0829556	0.1429	0	0	0.0151	0	0.4286	0.07178	0.2105	0.0189111	0	0	0.1119	0	0	0.01337	0	0	0.1765	0.2195	0.07036	0.18824	0.0638	0	0.0789	0	0.34591
ZNF385A|22176|AP	0.7025	0.7238	0.45891	0.1382	0.5886	0.242	0.674	0.2244	0.5021	0.3758	0.1644	0.33185	0.838	0.1231	0.8142	0.7773	0.5331	0.41244	0.9754	0	0.406756	0.7171	0.1307	0.8855	0.6256	0.1949	0.8448	0	0.5893	0.4478	0.7148	0.4462	0.3852	0.3049	0.1693	0.2846	0.719	0.33744	0.3197	0.3852	0.3948	0.6528	0.2117	0.5489	0.3942	0.7193	0.7203	0.4673	0.4292
MAST4|72276|AP	0.6647	0.5747	0.233	0.8106	0.1921	0.2015	0.0402	0.0099	0.4299	0.6004	0.0876	0.0562	0	0.1756	0.1775	0.30575	0.4372	0.0332	0.2608	0.3606	0.0056	0.8104	0.7582	0	0.259	0.2997	0.1021	0.1457	0.6342	0.6852	0.5001	0.7631	0.933	0.0848	0.2359	0.0967	0.8727	0.1352	0.6015	0.8054	0	0.3366	0.5709	0.1286	0.2725	0.0545	0.0237	0.3927	0.3594
ELN|80045|ES	0.0767	0.07521	0.0749	0	0.0557333	0.0166	0.1283	0.2318	0.1761	0	0.0767	0.0389	0.104433	0	0.0004	0.049225	0.0984	0.112514	0.0684333	0	0.1911	0.0476	0.175	0.07067	0.1071	0.0189	0.2721	0.0218	0	0.08829	0.0121	0.6428	0.0444889	0.6457	0.110122	0.114629	0.0716	0.1525	0.1911	0.06365	0.0371	0.175	0.0395	0.022	0.197	0.05855	0.0826	0.0894	0.110275
FBXW7|70848|AP	0.1852	0	0.0902	0	0	0.0395	0.1415	0.0672	0.0797	0.1287	0.1831	0	0.129356	0.178	0.0184	0	0.2025	0.4041	0.1492	0.061	0.6589	0	0.0552	0.1242	0.1348	0.1316	0.1694	0.3471	0.1019	0.0589	0.0721	0	0.0818	0	0.1634	0.0691	0.0928	0	0.2457	0.0414	0	0.0463	0	0	0	0	0	0	0.379
ZNF843|36253|AT	0.1412	0.0577	0.2447	0.1988	0.0866	0.0591	0.295	0.0829	0.0821	0.4087	0.1347	0.0264	0.3642	0.243	0.1727	0.3447	0.0639	0.0226	0.062	0.027	0	0.051	0.0374	0.0277	0.292	0.0434	0.1114	0.2538	0.0235	0.0108	0.1332	0.0479	0.3553	0.0961	0.0285	0.0591	0.0246	0.052	0.122	0.0827	0.0886	0.1137	0.1501	0.0044	0.0448	0.0848	0.0385	0.0343	0.0165
PDE5A|70466|AP	0.2301	0.1889	0.212	0	0.14503	0.1001	0	0.2699	0.1955	0.0699	0.3004	0	0.13705	0	0.129	0.12053	0.3104	0.2354	0	0	0.091	0.15905	0.1535	0	0.433	0.0888	0	0.0934	0.15719	0.3071	0	0.12657	0.10217	0.13471	0	0	0.1894	0.10637	0	0.13593	0.12429	0	0	0.13531	0.3733	0.16318	0.0991	0.14563	0
AP1B1|61603|ES	0.2564	0.2597	0.1922	0.451	0.4443	0.2653	0.1099	0.233	0.2891	0.2234	0.2992	0.0916	0.14	0.1555	0.0792	0.0609	0.1596	0.1628	0.1341	0.0866	0.25165	0.1562	0.1048	0.1293	0.0547	0.3246	0.0897	0.1703	0.2815	0.3535	0.1185	0.1048	0.1685	0.1117	0.2139	0.1916	0.137	0.1261	0.1444	0.1801	0.2425	0.1221	0.3093	0.1652	0.1747	0.0899	0.1168	0.1759	0.0715
TPM1|30990|ES	0.1384	0.0595	0.1115	0.1452	0.164	0.0771	0.1337	0.0847	0.0757	0.0439	0.0537	0.0645	0.0396	0.2922	0.1926	0.0256	0.0495	0.3635	0	0.2824	0.1628	0.1096	0.4185	0.2272	0	0.0774	0.0912	0.0188	0.1573	0.1593	0.0803	0.2818	0	0.0901	0.0549	0.0337	0.1219	0	0.048	0	0.2816	0	0.1539	0.2027	0.0837	0.1114	0.1615	0.0698	0.5823
ELP3|83202|AP	0.219	0.1585	0.6545	0.42	0.0538	0.2424	0.0603	0.514	0.0782	0.5814	0.1255	0.0814	0	0.0886	0.1735	0.2441	0	0.3958	0.2007	0.6472	0.5466	0.2377	0.1469	0.3669	0.1215	0	0.1174	0.354	0.4821	0	0.3924	0.4456	0	0.1076	0.1147	0.2736	0.9304	0.437656	0.2053	0.2007	0	0.2822	0.3419	0.9268	0.1882	0	0.2509	0	0.9521
CPNE5|75991|AP	0.5803	0.0145	0.15138	0.4646	0	0.0212	0.1285	0.0096	0.2128	0.0092	0.14262	0.0453	0.153443	0.0481	0.3989	0	0.0145	0.0356	0.1688	0.179812	0	0.164575	0	0.2791	0.5097	0.0495	0.5521	0.6572	0.7456	0.742	0.0387	0.283533	0.0356	0.4364	0.0792	0.2098	0.0996	0.0687	0.175113	0.8878	1	0.0996	0.0524	0.1351	0.083	0.177571	0.2401	0.3989	1
ICAM3|47503|RI	0.3873	0.1115	0.3029	0.4446	0.352	0.0747	0.3375	0.1234	0.2537	0.0702	0.1043	0.1964	0.098	0.4085	0.5238	0.0548	0.1546	0.4434	0.4299	0.2958	0.1408	0.2812	0.3029	0.3981	0.2369	0.1938	0.2642	0.35	0.1352	0.2953	0.1674	0.4033	0.1964	0.2483	0.2184	0.352	0.1507	0.1203	0.4434	0.1104	0.1785	0.238	0.2332	0.1533	0.1474	0.705	0.3748	0.3029	0.5157
KIAA0195|43443|AP	0.0871	0	0	0	0.0351	0.0474	0	0.0099	0.09	0.0167	0	0	0.0542444	0.1559	0.0205	0	0	0.166	0	0.1187	0.6042	0.1602	0.0668	0	0.0285	0.0644	0	0.0756	0	0	0	0	0.2465	0	0	0.02847	0.0345	0.02947	0	0	0	0.0643	0	0	0	0	0	0.1128	0
METTL21A|57184|AP	0.4214	0.1401	0.2353	0.2605	0.1538	0.1594	0.2675	0.1668	0.1852	0.0715	0.2569	0.3884	0.16	0.2818	0.0914	0.2014	0.4311	0.5099	0.035	0.0453	1	0.237	0.1976	0.1392	0.0437	0.1677	0.017	0.4275	0.3115	0.3233	0.2005	0.2464	0.1984	0.2149	0.0921	0.1864	0.171	0	0.1491	0.0534	0.0498	0.0379	0.0828	0.1087	0.0943	0.1879	0.1512	0.2592	0.4552
KIAA1217|10993|AP	0.0189	0.0407	0.0272	0.1131	0.0125	0.1164	0.1136	0.0384	0.0296	0.1286	0.0056	0.0724	0.1291	0.0334	0.1406	0	0.0165	0.2036	0.0289	0.0361	0.1246	0	0.0186	0.033	0.0777	0.1194	0.0092	0.0658	0.0592	0.0257	0.0658	0	0.0359	0.0351	0	0.08542	0.0143	0.06657	0.0169	0.1648	0.0438	0.0718	0.0344	0.0546	0.0481	0.139	0.1237	0.0903	0
BIN2|21843|ES	0.2162	0.0905	0.13227	0.5409	0.0785778	0	0.1841	0.0156	0.0253	0.051	0	0.0514778	0.110467	0	0.8216	0.4293	0.0416	0.6007	0.0547	0.22519	0.2733	0.12706	0.2117	0.22	0.3715	0.0245	0.0449	0.06919	0.0449	0.1236	0.07	0.0838	0.07889	0	0.3259	0.2947	0.2005	0.0987333	0.10472	0.06695	0.07065	0.059	0.0362	0.2005	0.0946	0.0961667	0.1583	0.11518	0.18407
PDE4DIP|4408|AP	0.1612	0.4788	0.5332	0.3881	0.283	0.1783	0.4055	0.4566	0.2617	0.0786	0.2143	0.337	0.176	0.2545	0.3235	0.4575	0.6521	0.1865	0.4155	0.1036	0.0886	0.1911	0.3128	0.1585	0.4108	0.3015	0.4368	0.2661	0.4058	0.3296	0.2882	0.572	0.1291	0.3239	0.1581	0.1352	0.1669	0.0671	0.6049	0.4992	0.3403	0.1123	0.2173	0	0.1241	0.587	0.3279	0.4738	0.2826
LAT2|80065|AT	0.1034	0.0334	0.1592	0.1186	0.1243	0.0465	0.09	0.1123	0.0541	0.0613	0.0702	0.059	0.0448	0.0272	0.1406	0.08	0.0545	0.3402	0.0788	0.121	0.2874	0.1482	0.1259	0.1502	0.1074	0.1542	0.1451	0.0705	0.1169	0.0811	0.1418	0.1356	0.0443	0.0245	0.0584	0.0306	0.1516	0.083	0.1017	0.0516	0.0162	0.0643	0.0974	0.0868	0.0826	0.0422	0.1172	0.0945	0.1006
CLIP3|49330|AP	0.0403	0	0	0.0124	0.1513	0	0.0561	0	0	0.0038	0.03528	0	0.0606778	0.0698	0.055	0	0.0561	0.222	0.1196	0.1513	0.144044	0.03713	0.0727556	0.1513	0.18	0.0295	0.0225	0	0.1326	0.1598	0.3375	0.1921	0.0819	0.02441	0.1921	0.4875	0.0208	0.04665	0.02947	0.04476	0.0609	0.0133	0	0.0257	0.1249	0	0.0353	0.0381	0.1249
IL18R1|54799|AT	0	0.0641	0	0.1564	0	0	0	0	0	0.3488	0.1079	0	0	0.0508	0.1048	0	0.0702	0	0.062	0.3896	0.0923	0.2539	0	0	0	0.0546	0.1011	0.1696	0.0578	0.0625	0	0	0.3425	0	0	0	0.1986	0	0.161	0	0	0	0.0958	0.1542	0	0	0	0	0
COL14A1|85015|AP	0.0447556	0.0369222	0.0624857	0.03423	0.0228333	0.2029	0	0	0.4044	0.0656	0	0.0203	0.0590111	0.0424	0.06401	0.0179889	0.0753	0	0.0234	0.4369	0	0.1129	0.1845	0.118	0.2136	0	0	0.0376	0.107	0	0.0535	0.0637714	0.0252125	0.0279778	0.0528556	0.0722143	0	0.0239	0	0.0224571	0.0402889	0.03171	0.0928	0.20584	0.104656	0.0268625	0.07678	0.1129	0.47028
FGFR1|83427|ES	0.1773	0.05223	0.0053	0.0397	0.0309	0.1921	0.0121	0.0049	0.1204	0.0509	0	0.0401667	0.2853	0.0366	0.2486	0.0058	0.0058	0.0395	0.0456875	0.140422	0.0158	0.3218	0.0807375	0.3899	0.335	0.3436	0.0049	0.0028	0.3476	0.0535	0.0837	0.5292	0.0701429	0.1499	0.4479	0.0565833	0.0065	0.10555	0.0853429	0.0429375	0.0835	0.1512	0.0720889	0.113	0.0808	0.0192	0	0.0692444	1
MBNL2|26141|ES	0.3113	0.5299	0.3871	0.1908	0	0.3772	0.6942	0.3676	0.5844	0.2977	0.4596	0.3658	0.250867	0.426	0.0619	0.3684	0.1789	0	0.332078	0.7022	0.3445	0.1641	0.3165	0.7677	0.395	0.2903	0.4828	0.4	0.2933	0.274	0	0.4839	0.1528	0.7092	0.4009	0.5466	0.3731	0.462	0.7826	0.6447	0.5111	0.26388	0.6046	0.6064	0.28882	0.8521	0.604	0.5782	1
SVEP1|87186|AT	0.1477	0.2197	0.5636	0.1146	0.1019	0.2311	0.276	0.5698	0.4541	0.161	0.1732	0.5202	0.1484	0.088	0.3839	0.3393	0.1052	0.5902	0.2337	0.4534	0.3092	0.1633	0.186	0.3144	0.1883	0.1872	0.5163	0.0871	0.5569	0.221	0.169	0.1146	0.4128	0.2603	0.1229	0.1739	0.1812	0.3788	0.2216	0.2652	0.1835	0.185	0.1307	0.2715	0.2988	0.4356	0.1624	0.2133	0.3207
MAP3K12|22061|AP	0.3558	0.3641	0.2236	0.459	0.1036	0.1307	0.2888	0.2107	0.3468	0.2822	0.5707	0.324522	0.264489	0.5621	0.2383	0.16	0.3761	0.0271	0.5298	0.0842	0.0479	0.5748	0	0.0501	0.2689	0.3044	0.1477	0.7244	0.2565	0.3044	0.1813	0.6003	0.283667	0.3603	0.1421	0	0.1716	0	0	0.240867	0	0.2048	0.164	0.0223	0.2538	0	0.1306	0.1723	0.2022
TANK|55731|AP	0.1588	0.3925	0.1165	0.4014	0.0698	0.1934	0.1431	0.26	0.2946	0.3088	0.3321	0.4144	0.2304	0.3837	0.4576	0.5698	0.2776	0.4597	0.2203	0.1366	0.44	0.1803	0.1742	0.1382	0.1883	0.3341	0.3077	0.0724	0.2233	0.1674	0.3331	0.0135	0.3298	0.2903	0.1683	0.1675	0.1961	0.3438	0.0741	0.1963	0.6215	0.2078	0.2505	0.1009	0.3836	0.6237	0.3506	0.194	0.0755
CLSTN1|575|ES	0.1387	0.1285	0.1362	0.5496	0.3674	0.08	0.0926	0.1379	0.0619	0.0775	0.0555	0.1033	0.1223	0.1546	0.6124	0.1652	0.1448	0.4644	0.0724	0.0792	0.2853	0.1639	0.146	0.0534	0.6326	0.1758	0.3111	0.2372	0.1655	0.1663	0.1614	0.055	0.0624	0.1982	0.1728	0.1909	0.1524	0.2035	0.0777	0.0798	0.1277	0.1953	0.1726	0.3905	0.237	0.0452	0.1811	0.1347	0.1854
FAM102B|3940|AT	0.2764	0.2149	0.1925	0.3878	0.0919	0.0772	0.3116	0.1125	0.2372	0.1478	0.112	0.0285	0.1231	0.1915	0.2501	0.0752	0.1998	0.5179	0.2019	0.3639	0.2419	0.2735	0.222	0.1779	0.0141	0.1294	0.1928	0.1928	0.1242	0.4212	0.2043	0.3577	0.2036	0.0814	0.2461	0.278	0.6587	0.5	0.0277	0.0708	0.1746	0.2707	0.3217	0.3901	0.2096	0.1502	0.3169	0.2363	0.575
CCDC50|68126|ES	0.6056	0.3693	0.7519	0.1311	0.0345	0.3691	0.2885	0.277	0.1837	0.2944	0.7209	0.7877	0.4375	0.3208	0.2875	0.6653	0.4538	0.616	0.5686	0.813	0.7773	0.6294	0.4815	0.7711	0.2572	0.2213	0.5022	0.4461	0.2121	0.4607	0.5565	0.7338	0.5532	0.3995	0.3406	0.541	0.4237	0.4545	0.3214	0.2794	0.6142	0.2791	0.4972	0.6987	0.2893	0.7559	0.7095	0.6125	0.4068
LMO7|26068|ES	0.0069	0.0953	0.0441	0.0649	0.0357	0.0849	0.1464	0.0298	0.0184	0.0205	0.0327	0.1165	0.109037	0.0351	0.1319	0.4921	0.035	0.3014	0.0845	0.1199	0.2882	0.0537	0.0367	0.1299	0.0168	0.0649	0.0637	0.028	0.1063	0.0497	0.2005	0.108	0.0689	0.0639	0.1566	1	0.1264	0.5785	0.1044	0.0419	0.0664	0.0415	0.0874	0.414	0.1639	0.2057	0.2331	0.144	0.263467
LRRN2|9485|AP	0	0.1251	0	0.5208	0	0	0	0.0239	0.1999	0.1815	0.1815	0.09509	0.4908	0	0.3012	0	0.0525	0.0561	0	0.0699	0	0	0	0.079	0	0.1139	0.1977	0.1097	0	0.1838	0.0235	0.2022	0.09633	0	0	0.0838	0.0897	0	0	0	0	0	0.107	0	0	0.422	0	0	0
AK5|3523|AP	0	0.0333	0	0.1034	0	0.0513	0.0688	0	0	0	0	0.0153	0.3021	0.0704	0.2032	0.0348	0	0	0	0.0618	0.1121	0	0	0.5041	0	0.0894	0.0513	0	0.0404	0	0	0	0	0	0	0	0.0239	0.1852	0	0	0	0.0673	0.4012	0	0.0715	0.0952	0.1081	0.1211	0
DTNB|52861|AP	0.0171	0.0209	0	0.0161	0	0.0501	0.009	0.0204	0.0208	0.0628	0.0281	0	0	0.0811	0.004	0.0232	0	0.3472	0	0	0.7346	0	0	0	0	0.0345	0.0182	0	0.0307	0	0.0543	0	0	0	0	0.01928	0.0211	0.1918	0	0.0436	0	0	0.0337	0	0	0	0.0096	0	0.0836
RGS12|68636|AP	0.1117	0.0339	0.0634	0	0.1039	0.1457	0	0.1186	0.07	0.0126	0.1249	0	0.064	0.035	0.0425	0	0.0975	0.2067	0.0116	0.1082	0.285	0.0642	0.0473	0.0251	0.051	0.1246	0.1587	0.0432	0.0495	0.0272	0.0875	0	0	0.0198	0	0	0.1217	0	0.0438	0.0638	0.0312	0.0285	0.0579	0.0432	0.0795	0.0566	0	0.0269	0.026
FRMD4A|10815|ES	0.0608	0.2322	0.101022	0.1304	0.08284	0.10762	0.1549	0.2211	0.0313	0.0296	0.0643	0.0951111	0.072	0.3121	0.2215	0.14202	0.2285	0.173129	0.2429	0.184762	0.12026	0.09538	0.12513	0.5437	0	0.1401	0.3909	0.0683	0.1549	0.0885	0.1964	0.2391	0.05617	0.0728	0.106667	0.0521	0.1304	0	0.3143	0.08531	0.1325	0.1304	0.1549	0.1908	0.15996	0.4231	0.1746	0.11664	0.4904
ANKRD65|167|ES	0.1316	0.083	0.0909	0.2381	0.14804	0.14432	0.0139	0.1123	0.09	0.0432	0.0585	0.2717	0.0126	0.1666	0.0535	0.16386	0.0314	0.25628	0.038	0.099	0.205867	0.0745	0.103	0.1778	0.0074	0.0196	0.0358	0.0172	0.1927	0.0506	0.0431	0.0213	0.1339	0.0314	0.2717	0.09723	0.046	0.2186	0.1106	0.1007	0.0357	0.1444	0.0536	0.161	0.0936	0.16946	0.4196	0.1379	0.0693
HYAL2|65007|AD	0.2318	0.2674	0.2288	0.1195	0.1732	0.0985	0.0147	0.1595	0.2764	0.0808	0.1081	0	0.07345	0.0615	0.0795	0.3161	0.0889	0.4589	0.0287	0.0911	0.5245	0.0601	0.3922	0.1494	0.0048	0.1579	0.0597	0.0428	0.131	0.0837	0.3094	0.0741	0.04419	0.0451	0.0522	0.1101	0.118	0.0239	0.1234	0.0822	0.5487	0.0521	0.1247	0.2371	0.157	0	0.1177	0.2938	1
CX3CL1|36541|AP	0.132	0.0777	0.1893	0.1381	0.1706	0.1275	0.1269	0.2295	0.0236	0.0847	0.043	0.0476	0.1327	0.1092	0.2848	0.0772	0.1109	0.4297	0.0417	0.3035	0.5547	0.0998	0.0607	0.443	0.0904	0.1833	0.044	0.0696	0.3253	0.0897	0.0724	0.1949	0.0119	0.0318	0.3755	0.7466	0.0829	0.111	0.2147	0.0288	0.0588	0.0805	0.1237	0.3582	0.1113	0.3002	0.2907	0.0495	0.5716
LIMA1|21688|AP	0.2182	0.2971	0.1359	0.6665	0.6322	0.1984	0.1939	0.2936	0.159	0.3697	0.0761	0.0648	0.5203	0.2951	0.3843	0.1925	0.2632	0.1424	0.6384	0.1366	0.1301	0.1141	0.0872	0.3916	0.2385	0.2562	0.5851	0.3639	0.1153	0.1728	0.2209	0.0295	0.1588	0.1147	0.4061	0.2127	0.2077	0.2007	0.0742	0.3462	0.5887	0.3663	0.2418	0.2096	0.2272	0.1883	0.1658	0.1114	0.1192
NCK1|66941|AP	0.1931	0.1912	0.1227	0.5032	0.3118	0.4274	0.0365	0.1979	0.1189	0.2353	0.5229	0.4566	0.0456	0.1501	0.1365	0.2796	0.2335	0.6	0.4266	0.0688	0.9118	0.2697	0.0845	0.2189	0.0378	0.1613	0.0915	0.2036	0.3511	0.0714	0.0679	0.107	0.1914	0.3714	0.3331	0.6614	0.0907	0.3564	0.4319	0	0.1437	0.1899	0.1136	0.1875	0.1508	0.2253	0.3158	0.2697	0.4348
SAA2|14577|AT	0.8779	0.2275	0.2705	0.1048	0.317	0.0629	0.1098	0.4557	0.0845	0.2437	0.1534	0.0341	0.2879	0.0474	0.6423	0.2464	0.1089	0.9629	0.1355	0.177	0.9639	0.7993	0.1502	0.5472	0.3994	0.1997	0.056	0.0668	0.3029	0.7607	0.3955	0.9016	0.1299	0.0559	0.0879	0.0962	0.2259	0.069	0.1243	0.3834	0.2443	0.0803	0.0974	0.1609	0.087	0.6591	0.2472	0.3094	0.0823
SH3BP2|68594|AP	0.1589	0.1285	0.1015	0.0245	0.2143	0.0917	0.2944	0.1043	0.0754	0.3959	0.1141	0.4984	0.15335	0.1191	0.3403	0.1093	0.2774	0.1257	0.1922	0.2876	0	0.2729	0.2147	0.3052	0.1427	0.2047	0.3397	0.4132	0.1028	0.1122	0.2968	0.17032	0	0.3784	0.0838	0.0956	0.2423	0.17035	0.3328	0.2646	0.4296	0.2738	0.2486	0.0994	0	0.1051	0.1546	0.1428	0.0275
LEPR|3295|AT	0.2169	0.0695	0.116	0.1816	0.1546	0.1781	0.2559	0.0456	0.3886	0.1158	0.3211	0.4258	0.5261	0.1091	0.05	0.2952	0.3278	0.0641	0.0239	0.0349	0.1107	0.0883	0.1417	0.0535	0.2476	0.275	0.2299	0.0943	0.0701	0.0842	0.1663	0.2319	0.0099	0.1226	0.2561	0.0704	0.2547	0.0399	0.0795	0.0289	0.0202	0.0609	0.105	0.0058	0.0881	0.0912	0.0026	0.1115	0.0047
FGD4|21027|AP	0.0669	0.0965	0.1793	0.3133	0.6114	0.3537	0.1379	0.1853	0.4333	0.1968	0.1187	0	0.16493	0.1961	0.0382	0.5195	0.0744	0.2937	0.1015	0	0.4204	0	0	0	0	0.3484	0.0282	0	0	0.2743	0.21094	0.198789	0.20801	0.21474	0	0.21021	0.2718	0.165133	0.1254	0.25484	0.23841	0.3547	0.20865	0.18718	0.2356	0	0.2046	0.19897	0.2428
RUNX1|60501|AP	0.0459	0.0591	0.0079	0.0299	0.0314	0.0488	0.0422	0.0392	0.2183	0.049	0.0952	0.1549	0.017	0.2371	0.0893	0	0.021	0.0194	0.0537	0.1774	0.0618	0	0.0429	0.0126	0.2534	0.0147	0.1291	0.0142	0.1284	0.0172	0.0826	0.0118	0.0942	0.0763	0.0162	0.0264	0.0143	0	0	0.3188	0.373	0.0699	0.0211	0.012	0.11	0.0225	0.0374	0.0708	0.1021
ADAP1|78554|AP	0.2662	0.3055	0.3386	0.401	0.2145	0.2022	0.0966	0.5267	0.1837	0.669	0.1021	0.0893	0.112457	0.1296	0	0.1267	0.6661	0.1625	0.17365	0.531	0.146325	0.2249	0.19897	0.6352	0	0.5652	0.1064	0.4654	0.3705	0.2602	0.057	0.7174	0.1197	0.1535	0.237	0.0885	0.1472	0.069	0.3914	0.1652	0.5211	0.1762	0.4814	0.2396	0.2602	0	0.52	0	0.245883
CNTN4|62954|AP	0.1109	0.0569	0	0	0.0829	0	0.0937	0.0356	0.0404	0.1532	0	0	0	0	0	0	0.0343	0.023	0	0	0	0.0829	0	0	0	0.2316	0.2807	0.0423	0	0	0	0.0491	0	0	0.1222	0	0.0259	0	0	0	0	0	0.0395	0	0.0443	0	0	0	0.0454
DACT3|50576|AT	0.4479	0.5149	0.5407	0.6545	0.6417	0.2896	0.3956	0.7624	0.434	0.3641	0.5049	0.2619	0.3049	0.37	0.5854	0.3009	0.3205	0.8592	0.6005	0.715	0.8259	0.4404	0.6533	0.6103	0.3897	0.5755	0.4349	0.2536	0.5358	0.4957	0.5375	0.6717	0.2788	0.2354	0.5479	0.3619	0.4298	0.6505	0.3894	0.5881	0.6043	0.5193	0.4301	0.6017	0.5943	0.604	0.4623	0.5107	0.7651
LAS1L|89321|ES	0.1844	0.0544	0.1165	0.6383	0.1725	0.0715	0.0247	0.0675	0.0458	0.102	0.0888	0.0733	0.0544	0.0374	0.0511	0.1773	0.0727	0.2235	0.037	0	0.1596	0.1165	0.1775	0.0738	0.0501	0.0903	0.0377	0.0424	0.1005	0.0795	0.149	0.0257	0.1996	0.0385	0.0829	0.0328	0.0717	0.0433	0.0862	0.0252	0.0979	0.0928	0.0551	0.1296	0.205	0.0857	0.0795	0.0975	0.1596
CYB561A3|16165|RI	0.092	0.0269	0.1065	0.0253	0.0186	0.0042	0.0345	0.0883	0.0243	0.0042	0.0227	0.0465	0.0772778	0.034	0.2115	0	0.0338	0.3279	0.0316	0.1099	0.1675	0.0544	0.0382	0.3312	0.0253	0.0937	0.0591	0.0048	0.0821	0.0465	0.1009	0.0613	0.0188	0.0137	0.0544	0.0267	0.0682	0	0.0537	0.0117	0.1183	0.0889	0.1365	0.4171	0.0842	0.0781	0.1623	0.0608	0.4015
BRD9|71455|AP	0.0733	0.0858	0.09	0.0685	0.0974	0.0568	0.0456	0.0535	0.0572	0.0997	0	0	0	0	0.1532	0.2352	0.0409	0.1118	0	0.0262	0.2352	0	0	0.1728	0	0.0954	0	0.0714	0.2168	0.0647	0.2226	0	0.1529	0	0.2403	0.4799	0.0391	0.0478	0	0.0421	0.0979	0.2197	0	0	0.2421	0.0403	0	0.0997	0
MBNL2|26144|ES	0.3016	0.3266	0.5713	0.0973	0.4265	0.3266	0.2924	0.5497	0.3647	0.5615	0.3945	0.3107	0.1886	0.0916	0.7038	0.4196	0.3908	0.4601	0.4818	0.4462	0.5081	0.4711	0.2099	0.3826	0.6344	0.4443	0.6844	0.3642	0.4265	0.2366	0.3469	0.3826	0.1839	0.4365	0.4239	0.39124	0.4618	0.37687	0.4818	0.6391	0.5535	0.6425	0.5203	0.41125	0.3826	0.6405	0.3826	0.358	0.623
QKI|78407|RI	0.2609	0.1748	0.6192	0.1472	0.2671	0.0999	0.2688	0.2305	0.1543	0.0938	0.1745	0.1598	0.2385	0.1561	0.4977	0.5973	0.3036	0.7157	0.1681	0.7421	0.8369	0.3724	0.3007	0.4084	0.1224	0.3785	0.6064	0.216	0.5322	0.3808	0.8696	0.3671	0.1228	0.20538	0.3311	0.4412	0.3677	0.4958	0.4666	0.24	0.2116	0.6881	0.3826	0.598378	0.4146	1	0.3607	0.4759	0.342
TNFSF13|38969|AP	0.2338	0.2697	0.2033	0.1725	0.1435	0.3029	0.211	0.2154	0.1137	0.2383	0.1374	0.1266	0.432	0.1681	0.2788	0.5318	0.4349	0.2928	0.0606	0.4519	0.2597	0.106	0.1804	0.3393	0.2027	0.1856	0.3871	0.2542	0.1447	0.0705	0.1562	0.4033	0.4233	0.2367	0.3014	0.3404	0.1591	0.2819	0.5779	0.1964	0.2821	0.2359	0.1774	0.3312	0.1563	0.2844	0.4349	0.1913	0.1863
SOD2|78301|AT	0.028	0.0129	0.003	0.0148	0.1614	0.2196	0.0362	0.026	0.0559	0.0267	0.0098	0.0419	0.067	0.1375	0.0756	0.2237	0.017	0.0189	0.0115	0.0179	0.0177	0.0084	0.0415	0.01	0.0144	0.0387	0.119	0.0243	0.0398	0.0603	0.0173	0.012	0.0144	0.0272	0.2422	0.1007	0.0282	0.0713	0.0186	0.0339	0.043	0.0093	0.0533	0.0048	0.0259	0.0405	0.0328	0.0264	0.0448
ARHGEF9|89301|AP	0	0	0	0	0.0228	0.0988	0.042	0.2114	0.0061	0.1193	0.0529	0	0.05606	0.144	0.3719	0.0532	0.0259	0.05893	0.0663	0.06025	0.0427778	0.0301	0	0.1297	0.05494	0.1436	0.05063	0.042	0	0.1005	0	0	0	0	0.0183	0.04893	0.1571	0.05268	0	0.0505	0.2488	0.0164	0	0.0505	0	0	0.0359	0.0515	0
LPHN2|3565|ES	0	0.3621	0.0399	0.3935	0.0596	0.5275	0.5631	0.0292	0.1396	0.0089	0	0.126514	0.4958	0.566	0.2199	0.165286	0	0.0356	0.4151	0.6804	0	0.05505	0.0850333	0.4715	0.0331	0.7102	0.0173	0.0375	0.10267	0.1159	0.371	0.10852	0.0737375	0.12041	0.1686	0.1676	0	0.4264	0.5079	0	0.100886	0.11177	0.2211	0.1785	0.177544	0.8274	0.3596	0.09295	0.226662
IPO11|72193|ES	0.1549	0.2157	0.18534	0.1458	0.0485	0.2698	0.1988	0.1569	0.0521	0.1795	0.0244	0.44	0.3708	0.0805	0.1035	0.1667	0.3073	0.2612	0.1251	0.2042	0.0991	0.1667	0.0909	0.21969	0.0975	0.2067	0.1821	0.1181	0.1074	0.0957	0.0556	0.0123	0.0378	0.1358	0.2977	0.1416	0.2578	0.2157	0.0643	0.0159	0.0378	0.1847	0.194	0.21699	0.23161	0.0139	0.19482	0.084	0.18174
ARL6IP5|101550|ME	0	0.0482	0.0344	0.1176	0.0569	0.0591	0.1427	0.0962	0.0418	0.0304	0	0.164	0	0.3435	0.0125	0.0614	0.1832	0.1485	0.0397	0	0.2484	0	0	0.0448	0.1357	0.0378	0.0263	0	0.1008	0.0513	0.0229	0.0239	0.1357	0.1959	0.0454	0.0468	0.0243	0	0	0	0	0.0202	0.0226	0	0	0.144	0.1249	0.0482	0.0155
SPTBN1|53576|AP	0.3291	0.0331	0.1421	0.0417	0.0139	0	0.0254	0.0513	0.1468	0.1079	0.0338	0.0099	0.0605	0.0905	0.0323	0	0.1421	0.2415	0.0622	0	0.1255	0.2022	0.0936	0.0352	0.0026	0.1177	0.0207	0.0881	0.0631	0.2558	0.1752	0.5634	0.0529	0	0.0192	0.3921	0.1427	0	0.0882	0.0305	0.0348	0.0761	0.2294	0.1389	0.0612	0.0336	0.0164	0.0393	0
ZNF677|51700|AT	0.2884	0.2024	0.0996	0.2897	0.1166	0.1959	0.1484	0.1245	0.0562	0.1464	0.2065	0.4441	0.2025	0.3532	0.0729	0.2202	0.2905	0.0573	0.0497	0.226	0.1362	0.1118	0.1385	0.2523	0.1979	0.1197	0.1735	0.1931	0.2129	0.137	0.2154	0.1335	0.3559	0.0201	0.0119	0.0118	0.1814	0.078	0.1089	0.0194	0.2785	0.1819	0.0427	0.0143	0.09	0.329	0.0181	0.0362	0.0072
MMP23B|202|RI	0.2268	0.0891	0.11803	0.15939	0.07359	0.1054	0.2463	0.2748	0.1678	0.1426	0.0498	0.1781	0.2268	0.1065	0.3548	0.1358	0.071	0.4231	0.13562	0.4127	0.319133	0.1908	0.1447	0.2683	0.084	0.1312	0.5238	0.1108	0.21	0.3195	0.2707	0.0274	0.007	0.0512	0.1549	0.5095	0.1421	0.1864	0.08621	0.1762	0.13518	0.4086	0.1518	0.5946	0.4628	0.16355	0.3064	0.5437	0.6788
PI4K2A|12728|AP	0.3069	0.202	0.017	0.4702	0.0668	0.5181	0.4433	0.2769	0.247	0.2125	0.0495	0.0866	0.1864	0.0904	0.2406	0.0594	0.4819	0.234	0.3042	0.1028	0.2048	0.2659	0.0924	0.0814	0.1157	0.1813	0.6067	0.022	0	0.2542	0.4145	0.5872	0.0209	0.0354	0	0.7403	0.3995	0.234	0.5094	0.0866	0	0.4503	0.1692	0.4781	0.37	0.04	0.1187	0.2156	0.321314
ACOT7|390|AP	0.1221	0.3126	0.0902	0.0339	0.0013	0.0471	0.0158	0.2578	0.1985	0.0934	0.1756	0.089	0.0697	0.0625	0.1165	0.1045	0.1509	0.182	0.0387	0.0561	0.2578	0.033	0.1598	0.0476	0.02	0.3633	0.0873	0.0818	0.2208	0.0611	0.3341	0.0462	0.2742	0.0574	0.154	0.0491	0.0156	0.1552	0.1135	0.0293	0.5086	0.1168	0.0981	0.0267	0.1829	0.0149	0.072	0.3139	0.0331
C15orf27|31921|AT	0.1109	0.4354	0.087	0.2854	0.2835	0.1618	0.2503	0.089	0.2921	0.4685	0.1269	0.5158	0.1931	0.3891	0.2002	0.203	0.2684	0.0491	0.168	0.0495	0.0785	0.1558	0.0845	0.2014	0.2257	0.1079	0.2888	0.1383	0.169	0.1071	0.0671	0.0924	0.3326	0.1875	0.1224	0.1002	0.0936	0.1826	0.2141	0.1258	0.0592	0.1756	0.3009	0.2316	0.1928	0.0766	0.2359	0.1006	0.0594
CLSTN1|576|ES	0.1157	0.0972	0.0945	0.0544	0.0887	0.0387	0.0545	0.1614	0.0401	0.1773	0.0411	0.0798	0	0.0562	0.1018	0.0585	0.2185	0.1828	0.044	0.0728	0.2025	0.0765	0.1403	0.0556	0.1449	0.1099	0.1382	0.2208	0.1327	0.1589	0.1093	0	0.1629	0.0134	0.2422	0.117411	0.179	0.112014	0.0183	0.0735	0.1298	0.0373	0.3049	0.127733	0.0585	0.0185	0.1254	0.0821	0
SCIMP|38666|AT	0.3637	0.1777	0.4392	0.3587	0.3247	0.2874	0.4404	0.2927	0.3813	0.2394	0.2068	0.384	0.2188	0.2335	0.5277	0.3708	0.2897	0.6716	0.2684	0.7182	0.5564	0.5217	0.4394	0.5272	0.3513	0.2712	0.4088	0.3754	0.3588	0.47	0.509	0.5457	0.2389	0.2811	0.2861	0.4756	0.5303	0.4351	0.5274	0.295	0.2711	0.3522	0.3264	0.4993	0.3997	0.5451	0.4211	0.353	0.4647
ELK4|9560|AT	0.0198	0.1015	0.109	0.0823	0.0838	0.165	0.2363	0.0415	0.0397	0.0848	0.0751	0.2103	0.1643	0.1185	0.1925	0.2622	0.0613	0.0643	0.1312	0.138	0.0632	0.0403	0.0945	0.1474	0.1336	0.1179	0.2961	0.1302	0.0823	0.131	0.0912	0.1902	0.0932	0.2301	0.204	0.2743	0.1015	0.3183	0.1782	0.196	0.0349	0.0405	0.1665	0.235	0.0983	0.2635	0.1784	0.0859	0.1426
TPM1|30980|AP	0.2996	0.45	0.7077	0.6549	0.4368	0.3017	0.5177	0.7328	0.5461	0.4805	0.7409	0.1552	0.1866	0.0329	0.4051	0.3351	0.2637	0.0644	0.3833	0.538	0.0328	0.704	0.5693	0.2549	0.4313	0.5739	0.2132	0.2653	0.5213	0.5632	0.175	0.634	0.4082	0.6755	0.4735	0.2257	0.3245	0.3266	0.4776	0.2907	0.0908	0.5362	0.3939	0.2724	0.3752	0.3123	0.4617	0.2907	0.4189
ZNF106|30163|AP	0.1429	0	0.0437	0	0	0.073	0	0	0	0.022	0.1482	0	0.0891	0.2957	0	0.05303	0.1789	0.424	0	0.08168	0.6129	0.0557	0.0412	0.0351	0	0.0389	0	0.0992	0.2742	0.07972	0.0632	0.06512	0.06533	0.05332	0.0791	0.05758	0.2665	0.0683444	0.136	0.0632	0.0386	0.05292	0.4404	0.102622	0.136	0.0354889	0.0575	0.0700889	0.078275
CAMKK2|24853|ES	0.0959	0.0752	0.0876	0.0323	0.0695	0.0542	0.0317	0.0484	0.0863	0.0293	0.0134	0.0262	0	0.1033	0.0629	0.0325	0.0755	0.3496	0.0775	0.065	0.280211	0.1258	0	0.1967	0.0504	0.0546	0.0445	0.1332	0.1483	0.0387	0.034	0	0	0.0843	0	0.0219	0.106	0.0732	0.0082	0	0	0	0.2995	0.0474	0	0	0	0.023	0
TMEM91|50043|AP	0.0469	0.0535	0.0975	0.0268	0.0166	0.0526	0.1265	0.088	0.035	0.0935	0.1911	0.2711	0.1336	0.0836	0.0464	0	0.1655	0.1559	0.3563	0.03	0.1284	0.0177	0.0205	0.169	0.1825	0.1311	0.0464	0.0837	0.0055	0.0389	0.0852	0.0102	0	0	0.087	0.1231	0.0244	0.2403	0.0941	0.0449	0.136	0.3302	0.1358	0.0255	0.0811	0.2499	0.2146	0.0913	0.1245
GALNTL6|71169|AT	0	0.05143	0	0	0.0402875	0	0	0	0.04123	0	0	0	0	0.2697	0.2988	0.4017	0.0167	0	0.03545	0	0	0	0	0	0.0616	0.1298	0.0721	0	0.2212	0.05743	0.1096	0.0146	0.0682	0	0	0	0	0	0	0	0.04355	0	0.0237	0.0019	0	0.0294375	0.0577556	0.0171	0
PPARG|63413|AP	0.5373	0	0.0637	0.6218	0.0591	0.0543	0.028	0.0584	0.1935	0.1586	0.1002	0.0179	0.15698	0.7864	0.14152	0	0.7214	0.3132	0	0.18389	0.4135	0.6595	0.2061	0.15464	0.10328	0.3419	0.2038	0	0.6012	0.1792	0	0.1704	0	0.2292	0.1257	0.102067	0.21377	0.2419	0	0	0.0171	0.1376	0.2426	0.13575	0.2404	0.0107	0.0139	0	0.208689
LAT|35908|AP	0.1567	0.0113	0	0.1038	0.2127	0.0281	0.1567	0.014	0.2145	0.0268	0	0.04607	0.0661	0.0692	0.1323	0.0515	0	0.143722	0	0.1641	0.161278	0.05114	0	0.1384	0.04659	0.0444	0.1457	0.04468	0.154	0.124	0.1003	0.1751	0	0	0	0.0451	0.2257	0	0.06102	0	0	0.1112	0.104	0.0902	0.0862	0.1134	0.1012	0.0804	0.2709
ADD3|13076|AP	0.0476	0.2452	0.2078	0.0511	0.1397	0.0452	0.093	0.0888	0.0465	0.1511	0.0702	0.1721	0.0325	0.1914	0.0449	0.05	0.0963	0.4312	0.0365	0.1051	0.3485	0.2027	0	0.0961	0.0106	0.0864	0.0798	0.1154	0.401	0.1682	0.0766	0.0697	0.0184	0.13499	0.178	0.12835	0.3082	0.11813	0.0916	0.14654	0.0814	0.1042	0.0673	0.178	0.1438	0.0275	0.1397	0.0977	0.0977
SH2B1|35865|AP	0.184	0.0842	0.1231	0.2093	0.0937	0.0988	0.2504	0.1952	0.2059	0.2053	0.0946	0.2225	0.0552	0.1461	0.0974	0	0.1178	0.1505	0.073	0.0121	0.0443	0.1211	0.1796	0.028	0.2617	0.1947	0.0192	0.1566	0.0705	0.036	0.0805	0.0182	0.0558	0.1298	0	0.0251	0.0904	0	0	0	0	0.0964	0.1089	0	0.1162	0	0.0574	0.1358	0.0164
IFNAR1|60398|AP	0.0459	0.1997	0	0.2702	0.0463	0.1342	0.1471	0.1039	0.0979	0.1094	0.0399	0.2078	0.4454	0.1633	0.1618	0.1809	0.0378	0.1249	0.3649	0.2329	0.0368	0.0799	0.1034	0.2588	0.2822	0.1499	0.2812	0.0838	0.0641	0.1268	0.2505	0.2758	0.1239	0.2313	0.2247	0.845	0.3105	0.5171	0.1162	0.1384	0.1355	0.1597	0.3487	0.8081	0.2329	0.1514	0.5793	0.2144	0.9077
MTUS1|82816|AP	0.0496	0.1756	0.2615	0.0424	0.3122	0.1904	0.0224	0.2271	0.1297	0.0409	0.0378	0.0609	0	0.0131	0.0641	0	0.1087	0.1836	0.0299	0.1049	0.0412	0.0491	0.07	0.0413	0.1511	0.0018	0.0276	0.034	0.0159	0.0634	0.0112	0	0	0.038	0.027	0.05854	0.0251	0.07327	0.1956	0	0.03777	0.0759	0.0902	0.1135	0	0	0	0	0.05661
ACAP1|38918|AP	0.0518	0	0.1467	0.1434	0	0.1481	0.2492	0.0807	0.334	0.1116	0.1606	0.1682	0.3091	0.0886	0.0677	0.3501	0.1111	0.1999	0.1666	0.2297	0	0	0.1567	0.2078	0.2435	0.0373	0.314	0.2141	0.0632	0.0496	0.125	0.7306	0.1084	0.3144	0.0561	0.2976	0.1663	0	0.5715	0.0643	0.0551	0.1718	0.0202	0.4581	0.0461	0.3141	0.3026	0.0678	0.3208
CSNK1G3|73145|ES	0.3099	0.2171	0.1419	0.5511	0.2127	0.1187	0.1009	0.2942	0.426	0.397	0.1459	0.0728	0.7491	0.0894	0.1846	0.1576	0.3	0.3133	0.2661	0.5934	0.2171	0.1746	0.1792	0.4636	0	0.1963	0.2588	0.2075	0.1642	0.2138	0.2432	0.125	0.1642	0.2536	0.1669	0.1158	0.337	0.20618	0.1009	0	0.1302	0.2723	0.3507	0.20366	0.1358	0.1009	0.2391	0.2632	0.0667
DLG4|38844|AP	0.0516	0.0396	0.2041	0.1301	0	0.0802	0.041	0.0578	0.0116	0.0305	0.1032	0.0184	0.0409778	0.008	0.1069	0	0.0234	0.6869	0.0134	0.10628	0.3969	0.0787	0.07707	0.3743	0.0147	0.0322	0.1522	0.0673	0.0623	0.0248	0.0855	0.05525	0.03506	0.03548	0.05851	0.04415	0.0927	0.05995	0.061	0.04185	0.0623	0.2234	0	0.1301	0	0	0.146	0.06179	0.1029
CLIC5|76409|AP	0.0264	0.0669	0.4531	0.0268	0	0.1577	0.6039	0.0182	0.0751	0.0066	0	0	0.0953556	0	0.6629	0.0261	0.049	0.1188	0	0.18538	0	0.1205	0.4282	0.174	0.091025	0.0225	0.1973	0.1159	0	0.7429	0.0815	0.0313	0.1527	0	0	0.173762	0.6897	0.4835	0.0303	0.0923889	0	0.1262	0.0342	0.325	0.0361	0.1907	0.5291	0.101	0.20465
ZNF185|90395|AP	0.2747	0.1689	0.0428	0.0742	0.0261	0.0851	0.1537	0.0584	0.0101	0.1461	0.2094	0.0625	0.1059	0.1016	0.1172	0	0.1253	0.1824	0.0245	0.09448	0.173057	0.0272	0.11505	0	0.0452	0.695	0.0459	0.0346	0.1192	0.14275	0.1331	0.1059	0.3534	0	0.1916	0.136875	0.1516	0.107686	0.1477	0.0996	0.0155	0.0356	0.0385	0.196788	0	0	0.0202	0.102822	0.151386
PFKFB4|64704|AP	0.1327	0	0.09218	0.1824	0.0716	0.1243	0	0.357	0.0249	0.0352	0.122911	0	0.0672	0.1256	0	0	0.1151	0.162233	0.07802	0.138	0.111113	0.11142	0.13088	0.0798	0.0389	0.0074	0	0.1428	0.2173	0	0	0.0744556	0	0	0.09947	0.101411	0.3163	0.145144	0	0	0	0.0798	0	0.12995	0.11096	0	0.1091	0	0.0794875
ADAMTSL2|88071|AP	0.2052	0.1095	0.156	0.0462	0	0.0888	0.1228	0.0735	0.1571	0.2516	0.161	0.2417	0.037	0.0968	0.1322	0.0738	0.0323	0.0488	0.037	0.0629	0.0254	0.1241	0.0786	0.0203	0.099	0.0435	0.0269	0.2669	0.0421	0.0292	0.0466	0.0188	0.1163	0.0478	0.0284	0	0.1279	0.0408	0.0286	0.0286	0.0898	0.0771	0.0933	0.0344	0.0323	0.0772	0.0504	0.1266	0
FKBP7|56168|ES	0	0.0282	0.0555	0.1965	0.0516	0.05325	0.0752	0.1172	0.0545	0.1034	0.0673889	0	0.035	0.006	0.1185	0.0415125	0.0663	0.0516	0.0691222	0.0725	0.147022	0.05999	0.0134	0	0.0488	0.2155	0.0801	0	0.0613	0.07902	0.2206	0	0.074	0.0982	0.04634	0.035	0	0.0072	0.0628	0.1521	0.0328	0.1041	0.1277	0.0516	0	0.0302	0.109	0.0654556	0.0626625
NAV1|9389|AP	0.0893	0.10349	0.4428	0.134	0.08058	0.08836	0.2511	0.2317	0.1103	0.2459	0	0	0.063625	0.0197	0	0.10789	0.1074	0.1464	0	0.1718	0.0731	0.08723	0.10052	0.1227	0.0913	0.2508	0	0.0066	0.1397	0.1337	0.0977	0.108313	0.2277	0	0.133075	0.136786	0.0928	0.13428	0	0.3972	0	0.4191	0.121444	1	0.2277	0.0394	0.0826	0.3461	0.3153
SLC19A1|60877|AP	0.1454	0.1107	0	0.4823	0	0.0309	0.0512	0.0206	0.0338	0.0509	0.149	0	0.071725	0.0559	0	0.1136	0.1652	0.18357	0	0.07217	0.231544	0	0.116889	0	0	0.1663	0	0	0.1484	0.2879	0	0	0	0	0	0	0.0418	0.0474444	0	0	0	0.0365	0.0855	0	0	0	0.0797	0.0616556	0.0559
ZNF782|86983|AP	0.2625	0.2124	0	0	0	0	0.1651	0.4127	0	0	0	0	0	0	0.326	0.308	0.3309	0.2705	0	0.1221	0.6692	0	0	0.09122	0.3309	0.1621	0.1982	0	0.182	0	0.3309	0.6496	0	0.1221	0	0.2075	0	0.2023	0.102544	0.05629	0.0868556	0.1292	0.08851	0.5266	0	0	0	0	0.210214
LIMCH1|69112|AP	0.0761	0.02	0	0	0.0069	0.27	0.0574	0	0.026	0.0362	0.2981	0.2761	0.063	0.3021	0	0	0.098	0.2296	0.07049	0	0.224	0.1006	0.0283	0.0897	0.013	0.05	0.1076	0.0491	0	0.0231	0.0307	0.0126	0.017	0	0	0	0.0988	0.1526	0	0	0.09872	0	0.0676	0	0	0	0	0	0
SVIL|11116|ES	0.0648	0.1767	0.2263	0.0913	0.0985	0.1413	0.123	0.1255	0.0469	0.1455	0.1022	0.3201	0.2509	0.2457	0.2001	0.0748	0.2628	0.6515	0.0708	0.0653	0.7351	0.2091	0.2518	0.1833	0.3469	0.1433	0.1467	0.2256	0.1387	0.3647	0.217	0.21409	0.0572	0.1049	0.134	0.19393	0.1708	0.0768	0.16639	0.0291	0.0928	0.0666	0.087	0.5683	0.2254	0.0255	0.2498	0.1413	0.3637
PSMB7|130207|ES	0.045	0.4411	0	0.2542	0.138	0.184	0.26	0.1548	0.0951	0.1165	0	0.3654	0.228463	0.4336	0.0877	0.408	0.1378	0.1121	0.5411	0.19945	0.217157	0.1605	0.4232	0.3197	0.16895	0.2957	0.18314	0.0983	0.0808	0.2075	0.0486	0.4395	0.1156	0.0618	0.5323	0.272888	0	0.233875	0.164611	0.15479	0.0605	0.1035	0.3919	0.202378	0.3781	0.3956	0.2851	0	0.758
SIGIRR|13650|AP	0.4011	0.3277	0.2879	0.2009	1	0.235	0.1488	0.4072	0.3485	0.1873	0.2524	0.1326	0.5652	0.3414	0.2509	0.5417	0.2429	0.8217	0.2453	0.1822	0.8922	0.1215	0.2653	0.1646	0.137	0.285	0.1273	0.2431	0.2183	0.2664	0.3605	0.1083	0.2453	0.0486	0.1621	0.3362	0.2738	0.1769	0.1006	0.2337	0.3903	0.2883	0.3087	0.1449	0.5001	0.4149	0.445	0.2281	0.1928
LMO7|26060|AP	0.0913	0.4274	0.2911	0.2549	0.0782	0.0625	0.2718	0.6394	0.0152	0.2187	0.1717	0.08893	0.208878	0.0049	1	0.11169	0.0613	0.7615	0.0302	1	0.7116	0.2372	0.2957	1	0.07198	0.2372	0.2574	0.0328	0.6353	0.3864	0.1106	0.0215	0.053	0.09068	0.3181	0.372978	0.5989	0.375756	0.14436	0.0446	0.067	0.1573	0.6724	0.49032	0.1176	0.0695	0.1691	0.3093	0.5748
S100A4|7713|AP	0.0344	0.1791	0.3583	0.296	0.0827	0.1198	0.2418	0.0865	0.0866	0.0541	0.0432	0.0727	0.0524	0.1917	0.1528	0.1051	0.0948	0.2591	0.2071	0.1676	0.3159	0.0717	0.1962	0.175	0.0268	0.0529	0.1616	0.0183	0.0483	0.0658	0.0812	0.1885	0.0286	0.0497	0.0556	0.16	0.0179	0.1279	0.1176	0.0454	0.0733	0.0675	0.1119	0.2107	0.0294	0.4864	0.1269	0.1277	0.018
EPB41|1411|ES	0.2473	0.651	0.5241	0.8261	0.2956	0.1894	0.8176	0.175	0.2746	0.1581	0.393	0.53157	0.381711	0.7642	0.8254	0.456622	0.4387	0.3266	0.6234	0.6074	0.5272	0.9277	0.5218	0.6861	0.7584	0.7376	0.7645	0.6497	0.4702	0.4976	0.1638	0.4583	0.4153	0.52269	0.395344	0.472333	0.2425	0.56622	0.50827	0.42352	0.8635	0.2651	0.336156	0.491344	0.390733	0.7757	1	0.3451	0.504967
SPAG9|42493|AP	0.0303	0.0165	0	0.0074	0	0.0661	0.119	0.0166	0.0154	0.0304	0.0333	0.0473	0	0.0214	0.0486	0.0699	0.0831	0.2315	0.0119	0.0198	0.4004	0.027	0	0.1097	0.0966	0.0204	0.0098	0.0438	0.0093	0.0084	0.0631	0	0	0	0.0738	0	0.0213	0	0.079	0	0.0245	0.0275	0	0	0	0.0075	0.0596	0	0
HMGA2|22881|AT	0.7497	0.0589	0.3984	0.0612	0.0134	0.0335	0.8949	0.7184	0.4276	0.0214	0.0115	0.0061	0.0669	0.0047	0.0046	0.0013	0.4102	0.1423	0.0056	0.0269	0.1271	1	0.1171	0.3674	0.425	0.4019	0.0029	0.1591	0.1051	0.0252	0.039	0.4336	0.2277	0.0073	0.4719	0.08	0.2245	0.1459	0.5578	0.5013	0.0008	0.1742	0.1193	0.4194	0.1942	0.0035	0.3147	0.0629	0.1412
PLXNC1|23721|AP	0.6195	0.3767	0.7274	0.9199	0.3003	0.0913	0.6772	0.2301	0.6043	0.2893	0.0879	0.2174	0.31142	0.5511	0.591	0.8399	0.8699	0.435	0	0	0.2652	0.3003	0.7677	0.34	0	0.1537	0.7157	0.5081	0.3207	0	0.5249	0.19772	0.0879	0.8019	0	0.273487	0.3673	0.267817	0.8252	0.1233	0.8872	0.7391	0.6115	0.291889	0.4735	0.328289	0.26392	0.4619	0.229167
MCAM|19134|AP	0.1023	0.0822	0.0932	0.0435	0.0688	0.1484	0.0986	0.1783	0.0985	0.0564	0.1047	0.0844	0.0752	0.0645	0.1394	0.176	0.0918	0.9072	0.1171	0.268	1	0.1271	0.2655	0.2968	0.0386	0.1034	0.0607	0.0444	0.2426	0.1999	0.1888	0.2331	0.0928	0.2527	0.1264	0.4196	0.1286	0.1802	0.1115	0.0528	0.1732	0.1558	0.1733	0.2263	0.1861	0.0711	0.2462	0.182	0.4979
RARB|63743|AP	0.2872	0	0.4135	0	0	0.0249	0.0367	0.9275	0	0.6929	0	0.0304	0	0	0.585	0	0	0.0859	0.0197	0	0	0.110011	0.1029	0.2386	0.1136	0.4223	0.034	0.0496	0.12115	0	0	0.7979	0	0	0	0.113178	0	0.204	0.0212	0.0793	0.04313	0.0435	0	0.14854	0	0	0	0	0.0941889
APOLD1|20516|AT	0.1308	0.035	0.145	0.1875	0.021	0.0257	0.1104	0.0639	0.0537	0.1129	0.0718	0.0407	0.0127	0.0583	0.0432	0.0191	0.1157	0.4946	0.0606	0.0477	0.4015	0.148	0.0561	0.074	0.053	0.1451	0.1386	0.306	0.125	0.2822	0.085	0.0546	0.0627	0.0414	0.0781	0.0376	0.1289	0.0237	0.0908	0.0989	0.0417	0.1017	0.0725	0.0679	0.1241	0.0317	0.1203	0.1282	0.0263
MEIS3|50643|AT	0.0809	0.1344	0.2481	0.1811	0.0385	0.1827	0.153	0.0976	0.1921	0.0885	0.0918	0.1989	0.1318	0.2766	0.2154	0.0584	0.1008	0.0624	0.0588	0.2254	0.1202	0.0718	0.1179	0.1898	0.1096	0.1744	0.0866	0.0944	0.2633	0.1889	0.1705	0.032	0.1835	0.1184	0.1729	0.2075	0.0932	0.3093	0.1302	0.2043	0.3198	0.0826	0.1519	0.1928	0.1644	0.111	0.2134	0.1301	0.149
EPHB2|1026|RI	0.3103	0.0699	0.1725	0.3028	0.2765	0.1604	0.1761	0.2809	0.0701	0.0979	0.3818	1	0.1259	0.0402	0.079	0.4405	0.2596	0.9307	0.0909	0.2335	0.6328	0.2047	0.5815	0.2668	0.5158	0.099	0.0812	0.1528	0.3891	0.262	0.2763	0.1898	0.1259	0.0424	0.4931	0.2434	0.727	0.2448	0.1015	0.3758	0.0535	0.2105	0.3098	0.3553	0.1266	0.0522	0.2376	0.1929	0.5411
LBH|53112|ES	0.086	0.0621	0.1113	0.1438	0.06	0.0701	0.0825	0.0863	0.0792	0.0485	0.0596	0.0233	0.0961	0.0785	0.0958	0.0833	0.1219	0.2985	0.0621	0.241	0.2448	0.1152	0.1725	0.1907	0.1215	0.0886	0.0924	0.0749	0.1919	0.1416	0.15	0.1836	0.0945	0.1147	0.1649	0.4687	0.1083	0.3061	0.1337	0.1251	0.179	0.1459	0.1474	0.3973	0.1914	0.1162	0.1988	0.1045	0.7181
PKIB|77376|AP	0.3576	0.2538	0.2051	0.6221	0.1231	0.0835	0.0648	0.4437	0.5015	0.6349	0.0855	0.2659	0.4061	0.2669	0.8184	0.3016	0.4244	0.6645	0.5089	0.222789	0.3172	0.288322	0.2428	0.3078	0.2791	0.2496	0.451	0.396	0.1247	0.1093	0.3301	0.7056	0.1819	0.0264	0.0346	0	0.269	0.1778	0.1061	0.063	0.23859	0.3728	0.2063	0.230944	0.3242	0.0753	0.22439	0.2365	0.3057
IL1RL1|54791|AT	0.1032	0.4281	0.1923	0	0.0575	0.0639	0	0	0.306	0.0666	0.5673	0.3488	0.3333	0.1285	0	0	0.0391	0.2829	0.1639	0.238	0.1602	0.0305	0.2152	0	0	0.1543	0.0813	0.2913	0.3642	0.2515	0.3622	0	0	0	0.0087	0	0.014	0	0.1666	0	0	0.3905	0.0675	0	0	0.1069	0	0	0
PLS3|89927|ES	0.0858	0.1052	0.1154	0.1102	0.0394	0.166	0.2153	0.1675	0.0443	0.0854	0.1041	0.0555	0.3015	0.0971	0.3636	0.0638	0.109	0.5497	0.1381	0.2922	0.3864	0.0932	0.1218	0.3843	0.5102	0.2099	0.2019	0.0925	0.3848	0.1128	0.252	0.1836	0.0762	0.1341	0.2398	0.7917	0.1314	0.4479	0.1919	0.0985	0.0742	0.2607	0.2755	0.8099	0.2353	0.1667	0.4326	0.0951	0.8233
SLC44A1|87110|AP	0.0241	0	0.055	0	0	0.0573	0.0637	0.0296	0.0338	0	0.0196	0	0.0498	0.0333	0.0241	0	0.0255	0.7562	0.0066	0.201	0.9419	0.0565	0.1889	0.3347	0	0.0774	0.0325	0	0.1908	0.0639	0.2512	0	0	0	0.1105	0.1733	0.0729	0.239656	0.1226	0.05996	0.0352	0.0852	0.12193	0.259189	0.1733	0.0298	0.42	0.4113	0.677
CCNL2|161|ES	0.099	0.123	0	0.0868	0.0984	0.031	0.1047	0.0996	0.2661	0.032	0.0763	0	0.10235	0.2888	0.0775	0.107575	0.0186	0.421	0.3203	0	0.198933	0	0	0.14172	0	0.6793	0	0.0314	0.182	0	0.0739	0.0862	0.072975	0	0.1666	0.1025	0	0.0637	0	0	0.4263	0.0973	0.4794	0.4287	0.2047	0.4934	0	0.1792	0.7118
PTK2|85295|AP	0.2626	0.0732	0.0824	0.1221	0.0549	0.0775	0.0401	0.0123	0.1022	0.1086	0.1547	0.0176	0.0137	0.0428	0.1198	0.0375	0.107	0.1526	0.0072	0.341	0.1824	0.0859	0.1691	0.3215	0.0228	0.2371	0.0395	0.0284	0.2282	0.1472	0.3892	0.1054	0.0077	0.0182	0.1651	0.1824	0.2098	0.0484	0.0853	0.0918	0.0623	0.152	0.2163	0.4588	0.3006	0.108	0.0992	0.2608	0.4856
CDV3|66833|AP	0	0.0382	0.0246	0.0146	0.0433	0.0741	0.0466	0.0918	0.0964	0.0507	0.0587	0.0432	0.0344	0.0514	0.0271	0.0327	0.0534	0.6407	0.0315	0.0444	0.7773	0	0	0.044	0.0299	0.0513	0	0	0.0749	0.0274	0.1315	0.1064	0	0	0.0227	0.108	0.0187	0	0.0382	0	0	0	0.0382	0.0215	0.0943	0.0627	0.119	0.1155	0.0732
SQRDL|30458|AP	0.1381	0.2395	0	0.02	0.0081	0.0552	0.0186	0.0445	0.0119	0.136	0.1922	0	0.1131	0.0231	0.2791	0.0091	0.0502	0.1112	0.0222	0.0665	0.316411	0.0292	0.0381	0.029	0.1429	0.1867	0.0133	0.0101	0.1004	0.1495	0.0724	0.0074	0.0626	0.0154	0.0027	0.066	0.2489	0	0.0098	0.153	0.0594	0.07	0.054	0.0463	0.0703	0	0	0.0345	0.3788
TCF12|30789|ES	0.1762	0.2415	0.292	0.1066	0.2464	0.317	0.548	0.1704	0.213	0.2439	0.1685	0.2895	0.159887	0.0901	0.5644	0.171	0.0683	0.234	0.4086	0.3769	0.0521	0.2593	0.2744	0.7598	0.1831	0.6193	0.3909	0.1239	0	0.2113	0.0498	0.375	0.0296	0.4142	0.2429	0.1329	0.2655	0.168133	0.5475	0.2363	0.1762	0.1614	0.1126	0.201144	0.2593	0.4817	0.5238	0.1325	0.206722
TC2N|28883|AP	0.1289	0.3725	0.0428	0.1318	0.2681	0.2377	0.03	0.282	0.2186	0.1647	0.3785	0.0637	0.4228	0.1295	0.13	0.3593	0.189	0.1856	0.416	0.0154	0.4796	0.2155	0.1761	0.0149	0.3247	0.2003	0.1289	0.0363	0.1472	0.0241	0.1088	0.0689	0.1381	0.0307	0.0235	0	0.6381	0	0.0397	0.2918	0.2897	0.282	0.2155	0.18565	0.339	0	0.1443	0.2155	0.2295
ARHGAP27|41957|AP	0.27025	0.5769	0.6187	0.6241	0.469329	0.9064	0.4984	0.3824	0.7215	0.7013	0.8017	0.9721	0.415533	0.4128	0.8488	0.8936	0.427	0.1396	0.7967	0.2854	0.0479	0.3014	0.3031	0.173	0.6944	0.477	0.35345	0.2755	0	0.5182	0.1071	0.324522	0.35667	0.36864	0.7747	0.402417	0.1836	0.405314	0.7879	0.34986	0.294013	0.4246	0.2869	0.5283	0.2963	0.9903	0.4191	0.359	0.4565
CCM2|79582|AP	0.064	0.0415	0.0448	0.0137	0.0341	0.065	0.008	0.0681	0.0102	0.0266	0.0758	0	0.0284	0.0489	0.0189	0.0146	0.064	0.6678	0.1459	0.0251	0.7785	0.0242	0.0573	0.0188	0.0029	0.0362	0.0376	0.0152	0.0776	0.0835	0.0506	0.0414	0.0144	0.0031	0.0155	0.0518	0.0307	0.03427	0	0.0014	0.0247	0.015	0.0436	0.327	0.0778	0.0128	0.0448	0.0518	0.0518
LHFPL2|72609|AP	0.0388	0.1859	0	0.0383	0.0366	0.061	0.029	0.2179	0.1628	0.1461	0.1349	0.0572	0.135625	0.2043	0.1698	0	0.0403	0.4393	0	0.0557	0.45375	0.08898	0	0	0.137	0.0788	0	0.1791	0.0395	0.0867	0	0.1138	0.0153	0	0	0	0.1791	0	0	0.0102	0	0	0	0.0712	0.0435	0.0135	0	0	0
NALCN|26204|AT	0.2154	0.4341	0.2531	0.8798	0.7881	0.3537	0.4475	0.5495	0.3569	0.3102	0.6844	0.145	0.0992	0.5806	0.8393	0.3246	0.2842	0.6067	0.779	0.4973	0.2379	0.3372	0.3058	0.4835	0.36345	0.4873	0.5222	0.1437	0.4598	0.5175	0.2316	0.2017	0.2706	0.5038	0.7362	0.585	0.2711	0.6996	0.3771	0.7425	0.547	0.4964	0.2712	0.7578	0.7915	0.4551	0.4582	0.2301	0.7919
ARHGEF6|90216|ES	0.265	0.2773	0.3424	0.282	0.7961	0.3779	0.5485	0.3702	0.3424	0.3048	0.2455	0.28214	0.42336	0.3665	0.7513	0.6457	0.3424	0.598	0.3191	0.8389	0.4098	0.38692	0.5656	0.7412	0.4838	0.5022	0.5395	0.2711	0.5274	0.5253	0.598	0.47852	0.3232	0.6345	0.8713	1	0.8241	0.7412	0.46357	0.5395	0.5101	0.4704	0.639	0.8514	0.5656	0.6756	0.7575	0.7412	0.8514
SMCO4|18300|AP	0.333	0.461	0	0.0682	0.3017	0.2587	0.0898	0.2161	0.1886	0.1821	0.327	0.0151	0.2752	0.3715	0.4475	0.0995	0.3665	0.6603	0.2465	0.0779	0.40278	0.0468	0.1684	0.1091	0.4691	0.2407	0.1661	0.0295	0.2556	0.1329	0.0698	0.067	0.2126	0.1182	0.416	0.3313	0.0841	0.1121	0.0826	0.2066	0.161	0.1018	0.2552	0.0512	0.1744	0.0423	0.0799	0.0956	0.2173
CAST|72863|ES	0.1323	0.0911	0.0607	0.1389	0.1445	0.0736	0.1037	0.0742	0.0648	0.0941	0.0863	0.0446	0.0725	0.0596	0.2177	0.0989	0.0917	0.1633	0.0656	0.0388	0.1402	0.0821	0.0779	0.1302	0.1074	0.1591	0.0572	0.1428	0.0677	0.1137	0.0924	0.0536	0.0691	0.0342	0.071	0.0667	0.1619	0.3077	0.0632	0.0591	0.0537	0.101	0.1605	0.3	0.085	0.0698	0.1167	0.0588	0.0667
VSTM4|11499|AT	0.2412	0.1881	0.2373	0.1939	0.2848	0.2409	0.1488	0.389	0.1464	0.1966	0.161	0.2305	0.2108	0.2189	0.3546	0.3341	0.1349	0.4326	0.2528	0.4213	0.3623	0.1456	0.0992	0.4395	0.1746	0.2757	0.2104	0.0959	0.276	0.1996	0.3013	0.3206	0.2614	0.1404	0.3105	0.3445	0.231	0.2389	0.1849	0.0653	0.1862	0.1926	0.2512	0.4118	0.3814	0.2516	0.4102	0.142	0.4038
CERCAM|87747|RI	0.1716	0.0653	0.1618	0.1407	0.1972	0.1074	0.0699	0.2857	0.0725	0.065	0.1432	0.0463	0.133	0.1114	0.295	0.1057	0.1883	0.4706	0.1231	0.2885	0.5456	0.0984	0.2071	0.4102	0.0755	0.1672	0.1417	0.0591	0.4219	0.2549	0.3106	0.1357	0.0817	0.1171	0.1863	0.5341	0.2031	0.6517	0.4124	0.302	0.1293	0.4956	0.3537	0.6181	0.3735	0.1606	0.3566	0.2778	0.948
ARHGEF11|8338|ES	0.3942	0.4739	0.1817	0.8177	0.9668	0.504	0.3878	0.3173	0.5192	0.3512	0.4761	0.1202	0.4335	0.4385	0.4048	0.202	0.4932	0.2099	0.1721	0.3388	0.2363	0.19	0.51	0.3272	0.3839	0.5931	0.3601	0.3152	0.4269	0.3753	0.4732	0.1359	0.2181	0.19	0.4602	0.6068	0.3503	0.3235	0.1721	0.3235	0.3162	0.2517	0.569	0.347	0.4455	0.1953	0.2137	0.2474	0.3773
CLASP2|63869|AP	0	0.0762	0.0531	0	0.0673	0.1618	0.0783	0.1079	0.196	0.0289	0.2926	0.13	0.0883	0.1015	0	0.046	0.0617	0.3269	0.0441	0.041	0.3061	0	0.0354	0	0.0231	0.0678	0.0313	0.0685	0	0.0197	0	0	0	0	0	0	0.0411	0.06264	0.174	0	0	0	0.142	0.1144	0	0	0	0	0.06389
NHSL2|89433|AT	0.1777	0.07881	0.07715	0.0923	0.0751667	0.09295	0.257	0.2392	0.1358	0.3117	0.2776	0.0983375	0.139543	0.1135	0.028	0.164967	0	0.0558	0	0.5298	0.0989	0.118733	0	0.3095	0.4345	0	0.1831	0.0209	0.0672	0.5591	0.13	0.3245	0.0998375	0.1612	0.116189	0.144814	0.2995	0.1259	0.111625	0.0827375	0.0627	0.1259	0.5257	0.2076	0.3656	0.1467	0.1874	0.106512	0.2992
QKI|78411|AA	0.2952	0.3197	0.2599	0.1077	0.138	0.3052	0.2496	0.3688	0.2675	0.4032	0.4262	0.1224	0.2416	0.3269	0.0984	0.1041	0.1891	0.429	0.1789	0.0896	0.547	0.1967	0.3268	0.4807	0.2299	0.389	0.0637	0.1333	0.149	0.3227	0.0621	0.1658	0.233	0	0.3231	0.0702	0.3599	0.351	0.1813	0.1433	0.2127	0.0973	0.1882	0.0811	0.4847	0	0.0876	0.1286	0.5099
IFRD1|81447|AP	0.0852	0.4098	0.0133	0.1176	0.1491	0.1272	0.0448	0.2203	0.0707	0.1016	0.1296	0.0397	0.3957	0.0068	0.1818	0.0147	0.1669	0.1524	0.0193	0.0302	0.1224	0.05425	0	0.4072	0.7606	0.5818	0.4215	0.1254	0.0108	0	0.0063	0.1015	0.0065	0.1132	0.1393	0.0948	0.013	0.113622	0.10383	0	0.0155	0.0119	0.585	0.0238	0.047	0.0731	0.4073	0	0.3786
C7orf49|81873|AD	0.1071	0.0534	0	0.159	0.0536	0.1123	0.082	0.1711	0.2018	0.2587	0.5391	0	0.0713571	0.0409	0	0	0.0389	0.209214	0	0	0.146833	0.147556	0.13005	0.2275	0	0.0533	0.0592	0	0.552	0.5481	0	0.100857	0.15909	0	0.1875	0.1986	0	0.2436	0.147511	0.0975	0.122	0.2707	0.4673	0.183533	0.4645	0.08957	0.0884	0.5347	0.7582
PTGIR|50570|AT	0.4207	0.3658	0.6272	0.3444	0.6309	0.3672	0.2637	0.5087	0.3351	0.3072	0.2283	0.5882	0.3439	0.1966	0.4955	0.4729	0.2078	0.7948	0.267	0.6034	0.8227	0.4179	0.4394	0.5481	0.2726	0.4277	0.3958	0.2732	0.4882	0.5123	0.5177	0.3878	0.2897	0.1727	0.4608	0.2481	0.4333	0.3743	0.1948	0.3081	0.4729	0.3397	0.2013	0.4729	0.4428	0.5128	0.2277	0.346	0.6207
PKN1|47976|AP	0.1152	0.157	0.084	0.0291	0.0545	0.2516	0.0388	0.3136	0.1981	0.1568	0.383	0	0.112	0.096	0.0765	0	0.3219	0.224344	0.3353	0.2516	0.204922	0	0.2066	0.1612	0.0278	0.1984	0.13	0	0.1574	0.065	0.2776	0	0.0877	0.0877	0.1679	0.3245	0.024	0.1439	0	0.1715	0.2237	0.3037	0.2767	0.2626	0.1986	0	0.1645	0	0.18543
MCTP2|32583|AP	0.3075	0	0.2359	0	0.0627	0.10961	0.0293	0	0.0779	0.0921	0.120689	0.080425	0.120825	0.1124	0.0416	0.0575889	0.2121	0.4194	0.11527	0.0931	0.8942	0	0.17903	0.2098	0	0.1267	0	0.2082	0.18694	0.1894	0.1665	0.0758778	0.264	0.0504	0	0.0884111	0.2667	0.175883	0.109822	0	0.0478222	0.1906	0	0.2147	0.17304	0.09343	0.0667	0.10513	0.299011
RPS6KA1|1282|AP	0.0456	0.0771	0.0371	0.0829	0.0997	0.1372	0.0187	0.1817	0.0401	0.0339	0.1186	0.0293	0.0927	0.0599	0	0	0.0712	0.0461	0.028	0.0604	0.3975	0.0255	0.0603	0.3213	0.0964	0.1237	0	0.0417	0.0111	0.0206	0.0821	0.0179	0.0426	0.0339	0.0197	0	0.0155	0	0.0436	0.0215	0	0.0096	0.0981	0.1085	0.0358	0.0573	0	0	0
TPM2|98132|ES	0.2067	0.0384	0.1259	0.2831	0.0157	0.0605	0.0657	0.1476	0.1195	0.029	0.0927	0.0148	0.0441	0.2879	0.2799	0.0354	0.0486	0.091	0.1761	0.1386	0.2663	0.0702	0.211	0.169	0.03216	0.0482	0.0359	0.0279	0.1863	0.1932	0.251	0.0835	0.05003	0.02531	0.0602	0.2215	0.1713	0.0627	0.07045	0.0546	0.0184	0.1993	0.1875	0.5301	0.5002	0.0418	0.129	0.3921	0.4704
AP1S2|88569|AT	0.1596	0.2394	0.3473	0.3615	0.1662	0.2252	0.3479	0.173	0.0976	0.3674	0.1974	0.4113	0.3449	0.1996	0.579	0.7412	0.1176	0.2915	0.509	0.5879	0.3058	0.2144	0.2289	0.5553	0.4797	0.5855	0.5693	0.1059	0.2986	0.1851	0.426	0.312	0.3951	0.266	0.1234	0.2371	0.182	0.2341	0.2268	0.3196	0.5078	0.3102	0.2268	0.2176	0.255	0.6211	0.188	0.1888	0.73
UVRAG|17880|AP	0.1258	0.2391	0.0916	0.2838	0.3761	0.0773	0.0903	0.1376	0.5328	0.2491	0.3307	0.3341	0.1735	0.1727	0.1133	0.0844	0.0867	0.0256	0.1257	0.0245	0.0332	0.2016	0.0678	0.0398	0.0632	0.2086	0.182	0.1696	0.2643	0.2371	0.0788	0.152	0.1155	0.1154	0.2945	0.0233	0.1289	0.0506	0.0893	0.0428	0.0489	0.1243	0.1015	0.0109	0.1187	0.0656	0.1341	0.1757	0.0786
TNIP1|74126|AP	0.0759	0.335	0.0337	0.2573	0.2452	0.3671	0.1486	0.4111	0.1634	0.2911	0.1745	0.2261	0.4414	0.5248	0.4184	0.4087	0.6291	0.2599	0.1066	0.1479	0.2668	0.0504	0.0256	0.346	0.3302	0.2163	0.5324	0.1293	0.1571	0.1539	0.199	0.2584	0.4653	0.208	0.1609	0.1625	0.101	0.3563	0.3987	0.2427	0.8147	0.1462	0.1248	0.303	0.3405	0.0431	0.0759	0.2721	0.2057
EEF1D|118824|ME	0	0.0351	0.0376	0	0.0697	0.0578	0.0749	0.0257	0.0165	0.148	0.0763	0	0.7714	0.0502	0.0854	0	0.0633	0	0.203	0.8158	0	0	0.0252	0.1562	0.3493	0.2456	0	0.1473	0	0.0277	0.055	0.042	0.0382	0.0465	0.126	0.0821	0.029	0.0446	0.0712	0.0485	0	0.0469	0.668	0.03	0.0317	0.0369	0.0796	0	0.0959
PHLDB1|19033|AP	0.1141	0	0.06054	0	0	0	0	0.049	0.025	0.1216	0.061	0.034	0.06129	0.0199	0.1511	0.04308	0.0683	0.2647	0.06926	0.278	0.2326	0.04862	0.168	0.3966	0.0373	0.1135	0	0.0841	0.2686	0.0717	0.1036	0.02704	0.0239	0.02327	0.05597	0.09371	0.2077	0.05602	0.03842	0.049	0.05159	0.088	0.3249	0.15753	0.3043	0.06153	0.1615	0.1609	0.21795
LTBP1|53179|AP	0.1009	0.0939	0.0599	0.5479	0.4847	0.0943	0.284	0.1101	0.0502	0.1656	0.0441	0.1256	0	0.0186	0.8078	0.0824	0.0142	0.0075	0.591	0.0715	0	0.0182	0.0127	0.3238	0.0488	0.1764	0.1391	0.0097	0.054	0.3501	0.0732	0.05415	0	0.10502	0.1187	0.15575	0.0477	0.0631	0.0884	0.07822	0.0107	0.231	0.0511	0.171729	0.1256	0.4853	0.1463	0	1
NPNT|70261|ES	0.1111	0.1238	0.1415	0.026	0.0074	0.0171	0.1748	0.013	0.1338	0.1123	0.2313	0.0183	0.09591	0.0859	0.14274	0.018	0.1811	0.6933	0.0471	0.0283	0.5687	0.1211	0.1359	0.14355	0.09734	0.066	0.0802	0.1205	0.15021	0.0225	0.1486	0.0139	0.1145	0.1165	0.09709	0.10964	0.0851	0.09347	0.0341	0.12144	0.14022	0.0471	0.0319	0.10268	0.1982	0.0134	0.12811	0.136	0.10269
DGKZ|15541|AP	0.3757	0.1104	0.0811	0.1486	0.1104	0.2464	0.1008	0.2719	0.3486	0.1184	0.268	0.1916	0.275	0.2641	0.0847	0.0514	0.4174	0.1128	0.4496	0.1629	0.2121	0.2402	0.1093	0.0948	0.1568	0.1754	0.2005	0.4168	0.2371	0.1049	0.4168	0.3515	0.0522	0.1042	0.3562	0	0.3039	0.0737	0.1263	0.0972	0.1157	0.1569	0.2344	0.1369	0.1721	0.0284	0.1255	0.3189	0.275
KANK1|85711|AP	0.1479	0.3965	0.204	0.8018	0.1704	0.3659	0.5467	0.3955	0.2712	0.1836	0.3147	0.16498	0.23865	0	0.2402	0.20378	0.4096	0	0	0.20573	0	0.1148	0.2801	0.4085	0.16323	0.0764	0.1585	0.3402	0.0452	0	0.154833	0.6491	0.3313	0.5898	0.391	0.7643	0.4573	0.295333	0.2546	0.1985	0.167667	0.2313	0.4319	0.2709	0.1527	0	0.2631	0	0.576
EXOC6|12541|AP	0.0499	0.0522	0.0625	0.0241	0	0.0145	0.0535	0.0518	0.0217	0.0083	0.1231	0.0387	0	0.0379	0	0.0281	0.1321	0.0546	0.0648	0.1984	0.1261	0.0472	0	0.0223	0	0.136	0	0.1008	0.07	0.0264	0.0925	0.1584	0	0	0.015	0.13002	0.0977	0.1984	0.0977	0.0529	0	0	0.3144	0.3512	0.0977	0	0.0625	0.1035	0
AUTS2|79910|AT	0.086	0.017	0	0.0596	0	0.1392	0.0339	0.0534	0.0047	0.0483	0.0437	0.0258	0.1324	0.0219	0.1721	0.0501	0.0842	0.127	0.059	0.1827	0.1954	0.0759	0.1354	0.0341	0.123	0.0369	0.0798	0.0652	0.0717	0.0395	0.0141	0.1577	0	0.0099	0.0707	0	0.2411	0.0591	0.0354	0.002	0.0043	0.0071	0.0715	0.0189	0.0046	0.1332	0.0043	0.0071	0.0908
FGD4|21030|AP	0.2737	0.8559	0.53	0.4511	0.3422	0.6076	0.6582	0.5224	0.4598	0.6264	0.5802	0.9383	0.47709	0.6242	0.9376	0.378	0.3384	0.0668	0.877	1	0.0242	1	1	0.8588	0.8957	0.4951	0.5641	0.6484	0.6975	0.43046	0.45502	0.47209	0.47904	0.58477	1	0.58441	0.3708	0.55363	0.6272	0.53005	0.56797	0.6453	0.49017	0.45814	0.48809	0.7545	0.57855	0.49508	0.47505
PTGER3|3413|AT	0.0817	0.1292	0	0.1131	0	0.1451	0.0732	0.0401	0.0831	0.1769	0	0.1826	0.165	0.2569	0.0243	0.2448	0.0773	0.011	0	0.0409	0	0.0496	0.0096	0.0996	0.0667	0	0	0.0669	0.1403	0.0179	0.1106	0.0447	0	0.1681	0.1347	0.0782	0	0	0	0	0.0661	0.0729	0	0.0766	0.2746	0.0739	0.0413	0.23	0.1024
HMGA2|22877|AT	0	0.2251	0	0.1614	0.0212	0.0788	0	0.2816	0	0.0728	0.0143	0	0	0.0422	0.0164	0.0057	0	0.0572	0.0193	0.0263	0.0449	0	0.0895	0.2442	0	0.1862	0.007	0	0	0.0198	0.0234	0	0.4973	0.0293	0	0	0.1855	0	0	0	0.0078	0.1718	0.6435	0.1733	0	0.018	0	0	0.0981
MKL2|34068|AP	0.1447	0.0509	0.1447	0	0.2529	0.1232	0.0569	0.0713	0	0.0305	0.0791	0.0631	0.0972111	0.0487	0.0145	0.0991556	0.1442	0.647	0.1365	0.2834	0.3312	0.2512	0	0.1042	0.4626	0.1989	0.1623	0.3179	0	0.3587	0	0.0855	0.10482	0	0	0.0886375	0.16472	0.0948143	0.2451	0.10262	0	0.0759	0.1149	0.137612	0.09527	0.0415	0.10109	0.0778222	0.0806
LRIG3|22771|AP	0.0446	0	0	0	0.0635	0.1033	0.0445	0.023	0.1224	0.0181	0.0455	0	0	0	0.0411	0	0.0409	0.6597	0	0	0.7622	0.0876	0	0.0501	0	0.0221	0.046	0.0623	0.0971	0.0809	0.0692	0	0.2569	0	0	0.03475	0.0313	0.0365125	0	0.01458	0	0.0549	0	0	0.1385	0	0	0.1741	0.0814
HOPX|69372|RI	0.5194	0.1226	0.251	0.1091	0.1736	0.0621	0.2126	0.2669	0.1658	0.2197	0.17431	0.0696	0.1906	0.0894	0.1923	0.0685	0.1588	1	0.116	0.0654	0.541744	0.6323	0.7436	0.0738	0.4765	0.24758	0.1573	0.2089	0.392	0.6495	0.1351	0.6904	0.1416	0.0449	0.1004	0.0615	0.4261	0.2396	0.163633	0.2736	0.0462	0.3839	0.3469	0.2857	0.2194	0.205467	0.2079	0.0931	0.35158
MYLK|66479|AP	0	0	0	0.1505	0	0	0	0.5387	0.5168	0.2634	0	0	0	0.2558	0.0801	0	0	0.117	0	0	0	0	0	0	0.4024	0.1482	0	0	0.6561	0	0.147	0	0.13227	0	0	0	0	0.09056	0	0.6009	0.6413	0.5054	0	0	0.1529	0	0	0	0
DENND2D|4141|AP	0.1898	0.4128	0.2047	0.3578	0.4478	0.337	0.0945	0.4279	0.306	0.1976	0.5265	0.5535	0.3759	0.3832	0.1088	0.0621	0.2839	0.4295	0.2376	0.1338	0.7318	0.2162	0.0826	0.1385	0.2704	0.3166	0.074	0.1103	0.2323	0.2927	0.3616	0.0944	0.236	0.094	0.3166	0.3616	0.1376	0.41	0.2917	0.3935	0.2579	0.2412	0.2778	0.2786	0.6063	0.2037	0.3752	0.3329	0.4892
SLC7A7|26621|AP	0.2219	0.3473	0.203	0.2697	0.1717	0.2695	0.184	0.2535	0.1435	0.3258	0.4967	0.606	0	0.2641	0.1148	0.1781	0.2462	0.0849	0.0672	0.1817	0.1161	0.209	0.1202	0.0355	0.0836	0.1381	0.1738	0.3398	0.0664	0.0702	0.0939	0.2854	0.2223	0.0687	0.0761	0.0216	0.177	0.0585	0.2582	0.1125	0.0792	0.1205	0.109	0.058	0.1331	0.0956	0.0876	0.203	0.0675
EPB41|1410|ES	0.2706	0.1493	0.0554	0.3873	0.1353	0	0.3364	0	0.0336	0.1002	0	0.137514	0.171267	0.2695	0.9078	0.8871	0	0.4511	0.159067	0.2052	0.1653	0.184587	0.0647	0.16255	0.9224	0.8674	0.3407	0.3909	0	0.0815	0.1042	0.146743	0.2361	0.4431	0.16461	0.153688	0.2787	0.180575	0.109838	0.1805	0.174789	0.4297	0.6644	0.15045	0.182844	0.201687	0.170637	0	0.157933
NUDT4|23679|AP	0.0548	0.0202	0.0139	0.0156	0.0482	0.0442	0.0082	0.0563	0.1204	0.017	0.0117	0.0398	0	0.1484	0.0368	0.0444	0.0292	0.6562	0	0.0207	0.2494	0.0645	0.0678	0.0084	0	0.0155	0.0129	0.0413	0.0265	0.0221	0	0.0186	0.0333	0.1214	0.0607	0.0364	0.0557	0	0.029	0.0337	0.2317	0.0555	0	0.0703	0.0928	0.0323	0.0665	0.0319	0.1813
SLC11A2|21725|AP	0	0.0893	0.0154	0.4992	0	0.0559	0.023	0.0974	0.0864	0.0774	0.1687	0.0458	0	0.0994	0.0553	0.0368	0.0703	0.5081	0.0385	0	0.3036	0.1164	0	0.0845	0.0133	0.0839	0.0329	0.0914	0.1998	0.0963	0.0646	0	0	0	0	0.1145	0.0152	0.03035	0	0	0.047	0.0994	0.0844	0.2638	0.1036	0	0	0	0.1711
SRSF11|3391|AA	0.0854	0.0144	0.0362	0.0165	0.0175	0.0304	0.0398	0.0862	0.0404	0.0197	0.0313	0.0435	0	0.0205	0.0756	0.0659	0.0243	0.1043	0.0185	0.1066	0	0.0452	0.211	0.1028	0.0347	0.0514	0.0149	0.0182	0.1071	0.1157	0.1397	0.0792	0.0608	0.0027	0.0833	0.109	0.1564	0.0392	0	0.0246	0.0808	0.0589	0.1824	0.595	0.1917	0.0618	0.1521	0.1216	0.5166
PHF19|87400|AP	0.3599	0.0733	0	0.0135	0.0842	0.1117	0	0.1553	0.0774	0.0666	0.0695	0.0716	0	0.027	0.1044	0.0695	0.1721	0.232889	0	0	0.152725	0.1553	0.100044	0.1144	0.0057	0.0474	0.0547	0.1212	0	0	0.1	0.2688	0	0.0494	0	0	0	0	0	0.0439	0.0146	0.0934	0.0545	0	0	0.0164	0.2098	0	0.0786
SFMBT1|65289|AP	0	0.1115	0.1243	0.0781	0.0154	0	0.0358	0.0539	0.136	0	0.0637	0	0.0796	0.2211	0.0322	0.0434	0.186	0.2196	0.0591	0.0691	0.671	0.0691	0.0831	0	0.0551	0.0551	0	0.0926	0.07787	0.0392	0.0791	0.2138	0	0	0.05713	0.07105	0.2591	0.0590778	0.1403	0.04671	0.0234	0.2256	0.09352	0	0.07821	0	0.0476	0.1891	0.07184
MID1|88465|AP	0.1155	0	0	0.0212	0	0.0652	0.0326	0.2797	0	0.2296	0	0.0623	0.0192	0.0106	0	0	0.0461	0.1712	0	0	0.0821	0	0.0644	0	0	0.0736	0	0.1751	0.04072	0	0.0136	0	0	0.0229	0.1248	0.0312	0.0191	0	0.0229	0	0	0.0206	0	0.2068	0	0.0136	0	0.1118	0
NINJ2|19604|AP	0.0421	0.0349	0.0265	0.0606	0.0203	0.1278	0.0125	0.0386	0.0492	0.0339	0.0176	0	0	0.0687	0.0272	0.0242	0.0529	0.1157	0.0152	0.0164	0	0.0634	0.0228	0.0425	0.0155	0.0509	0	0.0433	0.0734	0.124	0.0239	0.0052	0.1929	0.0172	0.0538	0.1451	0.0507	0.3232	0.0604	0.1189	0.0559	0.0921	0.0603	0.0485	0.0198	0.0929	0.0082	0.0158	0
TBCK|70265|AP	0.2232	0.0988	0.1862	0.1209	0.1537	0.1059	0.1536	0.0666	0.3238	0.057	0.257	0.2744	0.043	0.0499	0.2245	0.0319	0.1808	0.3185	0.014	0.0176	0.461	0.1199	0.1081	0.0216	0.1428	0.1594	0.1492	0.076	0.1523	0.1081	0.114	0.1135	0.0343	0.064	0.0989	0.0065	0.0809	0.0057	0.0613	0.0055	0.0594	0.0491	0.0681	0.0092	0.067	0.0878	0.0064	0.1816	0.0391
DDAH1|3657|AP	0.0216	0.0655	0.0049	0.046	0.0456	0.1071	0.0422	0.0504	0.1854	0.0761	0.0549	0.0255	0.143788	0.1004	0.1508	0.1084	0.0522	0	0.033	0.2032	0.0419	0.0191	0.0537	0.2242	0.6827	0.0647	0.0663	0.068	0.0327	0.0434	0.1084	0.0639	0.0929	0.0367	0.1564	0.2319	0.2673	0.0914	0.0098	0.0245	0.1791	0.0374	0.13	0.0713	0.3356	0.0228	0.176	0.1189	0.2906
ADRA1A|83140|AT	0.2516	0	0.097	0.0485	0	0	0	0	0	0.0518	0.2535	0	0	0.0213	0	0	0.0259	0	0	0	0.1316	0.111	0.2542	0	0	0.1708	0	0.1432	0	0	0.0589	0.0837	0	0	0	0	0.0147	0	0.0261	0	0	0.0126	0	0	0	0	0.0185	0.0394	0
C7orf10|79306|AT	0.0928	0.0367	0.2274	0.1906	0.0993	0.0329	0.0844	0.1709	0.0362	0.0443	0.388	0.0054	0.0384	0.1254	0.0485	0.0567	0.0397	0.709	0.1298	0.1766	0.3656	0.1246	0.0608	0.055	0.0714	0.3485	0.0511	0.0283	0.0989	0.0608	0.0697	0.109	0.0352	0.0223	0.0824	0.0471	0.0935	0.0381	0.1259	0.0932	0.0813	0.0653	0.1455	0.1521	0.1189	0.0626	0.0612	0.0395	0.1648
ZNF331|51724|AP	0	0	0.2946	0.1437	0.1052	0.3865	0.1882	0.1153	0.017	0.1221	0.2526	0.6118	0	0.343	0.2165	0.1526	0.0685	0	0	0	0.5841	0.2384	0.3862	0	0.165	0.4192	0.1248	0.689	0	0.288	0.0682	0.2316	0	0.0889	0.5167	0.0437	0.0757	0	0.2142	0.2867	0.0845	0	0	0.058	0	0.118	0.0821	0.0996	0
ZNF587B|52345|AP	0.0378	0	0	0	0	0.1209	0	0.0409	0.0207	0	0	0.04894	0.05373	0	0.0799	0.084	0.171	0.6398	0	0	0.7122	0.0728	0.0885	0.0791	0.4269	0.0909	0.1255	0.0463	0.0544	0.0296	0.0416	0.05389	0.0399	0	0	0.084	0.2362	0.05575	0.06879	0	0.04566	0.0991	0.0643	0.0438	0.1304	0.1502	0.1907	0	0.1136
MEF2C|72747|AP	0.0929	0.1263	0.0713	0.3127	0	0.1793	0.0615	0.2132	0.0895	0.1493	0.1941	0	0.1409	0.154	0.6124	0.2906	0.042	0.233	0.1493	0.4013	0.2633	0.1449	0.1161	0.686	0.4608	0.2933	0.0413	0.0229	0.2322	0.3728	0.2937	0	0.0387	0	0.3906	0.6925	0.499	0.2598	0.305	0.0579	0.2055	0.3345	0.5287	0.6431	0.6139	0.3532	0.8468	0.6396	0.8528
CNKSR1|1232|AP	0.0321	0.0184	0.0126	0	0	0.1684	0.0352	0.1643	0.0114	0.0589	0.0382	0	0.00681429	0.0176	0.0265	0.0174	0.0092	0	0	0.02	0.2523	0.0083	0	0.0121	0	0.0479	0.0049	0.0104	0.0129	0	0.0382	0.0071	0	0	0.0899	0.0349889	0.0329	0	0	0.0207	0.0213	0.0581	0	0.0387	0.0763	0.0315	0.0098	0.0578	0
SLMAP|65389|AP	0	0	0	0	0	0.0583	0.0496	0	0	0	0	0	0.0545444	0.0862	0.0321	0	0.1689	0.4126	0	0.07139	0.4534	0.05127	0.07443	0	0	0.0796	0	0.0879	0.06488	0.1037	0.07105	0.04895	0.04988	0.1002	0	0.0397	0.0572	0.06675	0.1089	0	0.0538	0.068	0.05767	0.06597	0.1489	0.0651	0.05328	0.05635	0.07839
EVL|29239|AP	0.0282	0.0609	0.3171	0.3974	0.0628	0.0496	0.2868	0.1111	0.23	0.2474	0.0222	0.4599	0.1426	0.2128	0.4571	0.2211	0.0661	0.0858	0.0663	0.0425	0.0604	0.3888	0.0418	0.2999	0.2619	0.0839	0.2071	0.3609	0.0247	0.5532	0.2572	0.329	0.1865	0.3319	0.1924	0.0891	0.5332	0.0208	0.3319	0.0368	0.0832	0.3393	0.0833	0.1705	0.0861	0.5824	0.4253	0.1678	0.0505
LIMS1|54881|AP	0.2187	0.2894	0.0443	0.077	0.031	0.1727	0.0905	0.2262	0.2669	0.0851	0.1729	0.0771	0.0801	0.297	0.045	0.1724	0.0582	0.246	0.0398	0.0614	0.2612	0	0.1222	0.0334	0.0854	0.2109	0.0482	0.1218	0.2395	0.1968	0.136	0.0754	0.1727	0.1616	0.2791	0.1561	0.1027	0.1065	0.0322	0.0705	0.1364	0.1152	0.0952	0.3148	0.1222	0.0301	0.0312	0.0889	0.1392
C9orf3|86940|AP	0.0996	0	0.0428	0.0316	0	0	0.0446	0.0584	0.5792	0.0469	0.0603889	0.0792	0.0303	0.0492	0.0518	0	0.0535	0.2551	0	0	0.2048	0.0925	0.05967	0	0	0	0	0.0412	0	0	0.0918	0	0	0.031	0.2432	0	0.0212	0.0553444	0	0	0	0.0787	0	0.0545333	0	0	0	0	0.0810333
CABP1|24774|AP	0	0.14556	0.15691	0.2248	0.13368	0.0961	0	0	0.0882	0.133	0	0.5982	0.2186	0.2625	0.2494	0	0.162	0.0254	0	0.0981	0	0.14143	0	0.162	0.4493	0.4947	0.246	0.3587	0.0981	0	0	0.2716	0	0	0	0	0	0	0	0.09141	0	0.0496	0.1155	0	0	0	0.056	0.12138	0
CENPM|62466|AP	0	0.0255	0.2731	0.0289	0	0.2796	0.0133	0.0414	0.0777	0.0152	0.2203	0.203	0.024	0.0238	0.0548	0.0761	0.1589	0.30548	0.0829	0.206	0.36245	0	0.5809	0.1606	0	0.0329	0.0993	0.2886	0.0167	0.1419	0.1817	0.1061	0.1314	0.037	0.148	0.2245	0.6539	0.0214	0.3246	0.0749	0	0.1003	0.0868	0.067	0.1021	0.1111	0.5258	0.1677	0.0352
NFYA|76094|ES	0.2232	0.3012	0.0372	0.6457	0.6342	0.0914	0.1611	0.1414	0.1286	0.1905	0.0773	0.0948	0.1884	0.1405	0.3045	0.0701	0.1615	0.4068	0.0773	0.067	0.3116	0.3012	0.0938	0.0591	0.1567	0.1715	0.1639	0.1221	0.3346	0.3183	0.1696	0.0419	0.0973	0.2391	0.0359	0.2582	0.1436	0.144367	0.0287	0.0357	0.1608	0.0619	0.2009	0.147667	0.1621	0.0653	0.1675	0.0914	0.138986
EXOC7|43570|ES	0.1092	0.0396	0.1033	0.0555	0.0032	0.0464	0.0181	0.0668	0.0415	0.06	0.0919	0.0421	0.0852	0.0078	0.1324	0.0173	0.0799	0.3028	0.1115	0.2043	0.3214	0.1086	0.1322	0.5107	0.0102	0.1717	0.048	0.0144	0.3363	0.2211	0.4773	0.0403	0.0218	0.032	0.1396	0.1506	0.1652	0.0911	0.1778	0.0071	0.0445	0.1924	0.1948	0.5614	0.5003	0.098	0.3941	0.328	0.7328
EXOC7|43573|ES	0.1088	0.1139	0.0886	0.2132	0.2188	0	0.0068	0.0722	0.073	0.2318	0.045	0	0.1191	0.0148	0.0795	0.2448	0.1102	0.3881	0.2201	0.123	0	0.1956	0	0.5333	0.0427	0.378	0.127	0.1357	0.0839	0.151	0.0779	0.1077	0	0.1659	0	0.0859	0.181	0	0	0.0369	0.0586	0.0464	0.2013	0.1286	0	0.2343	0.2059	0.1685	0.3087
ELN|80043|AA	0.1311	0.0647	0.2216	0	0.1437	0.0399	0.3563	0.4964	0.288	0	0.2035	0.094	0.172383	0	0.0064	0.20315	0.1839	0.2167	0.178675	0	0.6595	0.0899	0.2756	0.10751	0.3218	0.0288	0.5991	0.0469	0	0.11324	0.0364	0.6748	0.2167	0.6155	0.1291	0.19232	0.133	0.3991	0.492	0.18449	0.0845	0.4773	0.0798	0.094	0.4798	0.12681	0.1846	0.2493	0.20276
CSMD2|1689|AT	0.2114	0.3106	0.0531	0.1339	0.0125	0.2233	0.3003	0.114	0.2438	0.2763	0.4688	0.4526	0.385	0.2072	0.442	0.2377	0.1265	0.0936	0.0791	0.1049	0.1682	0.0665	0.1027	0.198	0.2705	0.1106	0.1969	0.1794	0.2613	0.2227	0.242	0	0.0576	0.1635	0.1494	0.1667	0.1824	0.1097	0.2946	0.2053	0.1382	0.3075	0.1804	0.2703	0.3624	0.1182	0.4224	0.2566	0.1594
CYGB|43589|AP	0.246	0.1714	0.037	0.2421	0.1003	0.2913	0.2513	0.2021	0.3468	0.1027	0.0509	0.1759	0.1114	0.3752	0.4574	0.2775	0.0746	0.4065	0.3729	0.235	0.269	0.0487	0.4448	0.2236	0.1341	0.0876	0.4276	0.1208	0.3105	0.0635	0.352	0.5943	0.2183	0.373	0.0894	0.2693	0.1636	0.0487	0.4043	0.18	0.2183	0.2919	0.2229	0.1114	0.247	0.0466	0.2996	0.2115	0.3387
TGFBR3|3739|AP	0.2586	0.2547	0.3983	0.439	0.466	0.2065	0.3512	0.0553	0.3963	0.2467	0.6451	0.7985	0	0.2043	0.1398	0.3836	0.2036	0.1885	0.0669	0.045	0.15	0.1381	0.099	0	0.4934	0.2618	0.2159	0.2314	0.1077	0.201	0.0423	0	0.4247	0.0687	0.0944	0	0.2903	0	0.1453	0.1935	0.0494	0.152	0.1398	0	0.0929	0	0.0928	0	0
FIP1L1|69311|AT	0.2764	0.1814	0.3914	0.0795	0.0904	0.2659	0.424	0.274	0.266	0.4228	0.3332	0.2864	0.2452	0.273	0.1417	0.2014	0.1651	0.5622	0.0504	0.1906	0.4671	0.2622	0.1659	0.138	0.1291	0.5032	0.0648	0.3207	0.2501	0.113	0.2222	0.0191	0.1833	0.0737	0.1003	0.0121	0.4112	0.0226	0.0831	0.136	0.1056	0.0732	0.0741	0.0845	0.1329	0.0523	0.092	0.156	0.0208
FBLN5|28888|AP	0.0148	0.0421	0.0439	0.0054	0.006	0.0286	0.0105	0	0	0.0243	0.0416	0	0	0.1441	0.0061	0.0337	0.0474	0.3417	0.0779	0	0.4076	0.049	0.0381	0	0	0.0055	0.0243	0.1133	0.0294	0.017	0	0.0492	0	0	0.0202	0.03897	0.061	0	0	0.1468	0	0	0.0365	0	0	0	0	0	0.05845
CTNND1|15942|ES	0	0	0	0.4408	0.3429	0	0.1443	0.0606	0.048	0.2876	0	0	0.111711	0.0346	0	0.245	0.2316	0.2574	0	0	0.2995	0	0.4184	0	0	0.2575	0	0.0515	0.1308	0.2498	0	0	0.13454	0	0	0.09355	0.534	0.131856	0	0	0.0404	0.1082	0	0.106956	0.129	0.0801	0.4121	0	0.0895
ZNF365|11877|AT	0.5976	0.3617	0.6167	0.3557	1	0.4769	0.135	0.7662	0.3305	0.4435	0.2011	0.1265	0.4912	0.5711	0.2953	0.0654	0.5623	0.7988	0.2383	0.707	0.6592	0.2797	0.6167	0.1869	0.3544	0.5879	0.1517	0.2569	0.502	0.4852	0.3149	0.7037	0.1566	0.0249	0.2736	0.1283	0.5047	0.3714	0.5984	0.2318	0.1936	0.3945	0.6662	0.4093	0.1578	0.0031	0.14	0.2201	0.6588
CECR1|60971|AP	0.5712	0.7535	0.421589	0.0254	0.9064	0.0526	0.1146	0.1635	0.8562	0.5816	0.1463	0.37905	0.432214	0.7027	0.5967	0.361737	0.7852	0.6961	0.386922	1	0.7507	1	0.4204	0.8712	0.636	0.4083	0.6889	0.8492	0.33248	0.38435	0.6664	0.8341	0.8479	0.40508	0.38868	0.3955	0.9402	0.7123	1	0.383275	0.335511	0.5561	0.6459	0.214	0.1022	0.492044	0.333389	0.384889	0.304737
CTNND1|16002|ES	0.0681	0	0.1419	0.1224	0.2397	0.0343	0	0.0117	0.0159	0.0127	0	0	0.08092	0.0459	0.0188	0	0.278	0.0918	0.033	0.0853	0.033	0.0229	0	0	0.0102	0.0426	0.074	0.0285	0.1651	0	0	0	0	0	0.1236	0	0.0291	0.04184	0.1005	0	0.0051	0.01	0	0.06945	0	0	0	0	0.0809
SEPT9|43714|AP	0.0236	0.0328	0.0262	0.0159	0.0151	0.0426	0.0156	0.1019	0.0095	0.0315	0.0544	0.0037	0.009	0.029	0.0191	0.0198	0.0263	0.1934	0.0684	0.018	0.1782	0	0.0414	0.0138	0.0048	0.092	0.0144	0.0085	0.0288	0.033	0.065	0	0.0494	0.013	0.0488	0.0356	0.0422	0.0993	0.0035	0.0434	0.0151	0.0393	0.0769	0.1049	0.0977	0.0004	0.0111	0.0364	0.0452
CD44|15131|ES	0.1546	0.0122	0.0552	0.0064	0.0068	0.0192	0.0413	0.1635	0.0277	0.0088	0.0674	0.2005	0.545	0.7905	0.0225	0	0.1167	0.2513	0.553	0.173	0.0814	0.4956	0.1662	0.4292	0.0023	0.0439	0.0837	0.1681	0.4559	0.1707	0.235	0.2667	0.1248	0.152	0.1181	0.2294	0.0465	0.1018	0.2645	0.2182	0.2995	0.282	0.1501	0.0263	0.1997	0.4078	0.0276	0.1808	0
HSPB7|785|AP	0.2979	0	0.4295	0.2941	0.09437	0	0.1394	0.2037	0.2905	0.4439	0.10667	0	0.10108	0	0.3484	0.3572	0.0453	0.6184	0.11649	0.6604	0.42239	0.059	0.2448	0.3465	0	0.1084	0.3044	0	0.23046	0.22568	0.4099	0.1182	0.07443	0	0.19121	0	0.4445	0.3465	0.1136	0.14666	0	0.3862	0.3743	0.30575	0.26898	0.6087	0.3813	0	0.1628
PCSK5|86632|AT	0.0327	0.5305	0.14	0.6901	0.4796	0.043	0.1185	0.0347	0.0161	0.1434	0.0636	0.0891	0.3629	0.1401	0.1796	0.2831	0.1369	0.784	0.0803	0.307	0.8033	0.1014	0.0282	0.8922	0.1196	0.0843	0.201	0.01	0.1916	0.1648	0.4222	0.6776	0.0397	0.0696	0.2119	0.3452	0.2734	0.1409	0.2027	0.1538	0	0.2962	0.0787	0.7065	0.1137	0.445	0.557	0.1713	0.3022
CNN3|3823|AP	0	0	0.0534	0.0414	0.0283	0.0296	0.0034	0.0175	0.0389	0.0162	0.0445	0.0445	0.0306	0.0415	0.014	0.0091	0.3904	0.795	0	0	1	0	0.022	0.0563	0.0119	0.0812	0.2326	0.1122	0.0812	0.018	0.213	0.0901	0.0531	0.0114	0	0	0.0265	0	0.0231	0.0398	0.0284	0.0529	0	0	0.0346	0	0.0337	0.0545	0.1909
SEMA4A|8190|AP	0	0.0291	0.0055	0.07711	0.0806667	0.1395	0.0123	0.0344	0.0232	0.167	0.1053	0	0	0.2019	0.0451	0.0874	0.0056	0.2191	0.0213	0.2497	0.2448	0	0.0611	0	0.0194	0.1471	0	0.013	0.044	0	0.0392	0	0.1175	0	0.0887	0.1869	0.0341	0	0	0.0501	0.10279	0.0079	0.0257	0.2019	0.1193	0.2965	0.2402	0	0
FHL2|54829|ES	0.1388	0.186	0.1245	0.2231	0.0082	0.0172	0.0461	0.5027	0.0182	0.0402	0.0185	0.0051	0.0764	0.0179	0.2493	0.059	0.0645	1	0.0605444	0.1714	0.2425	0.101744	0.1937	0.2591	0.0807	0.1514	0.058	0.0488	0.1841	0.2268	0.0668	0.311	0.058	0.0327	0.1495	0.1413	0.217	0.1074	0.1839	0.0299	0.0519	0.1682	0.2812	0.3829	0.0963	0.0597	0.0987	0.1072	0.5423
CD33|51314|AT	0.1849	0.0648	0.7547	0.1566	0.1117	0.128	0.2668	0.1967	0.12	0.1505	0.0788	0.1856	0.0607	0.0942	0.2537	0.1787	0.1448	0.6679	0.2829	0.6061	0.613	0.3299	0.2282	0.2978	0.1332	0.1922	0.3887	0.1672	0.1415	0.1698	0.3548	0.2496	0.0598	0.0753	0.1314	0.0958	0.2156	0.2818	0.146	0.1432	0.1375	0.1699	0.1221	0.1935	0.1846	0.3482	0.2451	0.2461	0.2218
SHC4|30507|AP	0.0635	0.0624	0.0271	0.0101	0.0398	0.0451	0.119	0.0081	0.0257	0.096	0.0406	0.3475	0.2228	0.168	0.0443	0.0669	0.0251	0.0051	0	0.1645	0.0006	0	0	0	0.5848	0.0107	0.1723	0.1843	0.0428	0	0.0909	0	0	0	0	0.0173	0.0087	0	0	0.2103	0.0445	0.0116	0.0366	0.0117	0.0205	0.0161	0	0.0374	0
NSFL1C|58506|ES	0.0708	0.0231	0.0363	0.1218	0.1038	0.0366	0.0719	0.0384	0.0215	0.0513	0.0483	0.0917	0.1004	0.0361	0.0558	0.0761	0.0603	0.1493	0.0542	0.046	0.1259	0.0259	0.0121	0.026	0.0252	0.0829	0.0869	0.0961	0.0503	0.0571	0.0572	0.0234	0.0335	0.0719	0.0216	0.0322	0.0753	0.0676	0.0685	0	0.0564	0.0373	0.078	0.0354	0.0284	0.029	0.0391	0	0.0672
FAM53C|73535|AP	0	0	0.0599	0.211	0	0.0766	0.1244	0.1131	0.0363	0	0	0.0766	0.14729	0.0646	0.1232	0.0701	0	0.165489	0.0701	0	0.130411	0.0939	0	0.0843	0	0.0646	0.1535	0	0	0	0.3988	0.4533	0.2165	0.1556	0.1915	0.214888	0.1621	0.132011	0.0852778	0	0.1059	0.0465	0	0.218522	0.3214	0.1309	0.1648	0.293	0.6885
SYTL2|18147|ES	0.2259	0.1054	0.0759	0.0759	0.3964	0.2864	0.1441	0.1681	0.0494	0.0237	0.0543	0.0232	0.166	0.0345	0.2287	0.1187	0.0858	0.4275	0.0987	0.1865	0.0759	0.1274	0.1796	0.2048	0.149	0.2673	0.0869	0.0375	0.1345	0.1527	0.1049	0.1067	0.022	0.0181	0.1796	0.1274	0.2189	0.09648	0.1078	0.0284	0.07875	0.0918	0.341	0.3964	0.1307	0.1169	0.0331	0.149	0.4219
RASSF8|20838|AT	0.1183	0.0796	0.2968	0.0695	0.0282	0.14	0.3242	0.2767	0.0933	0.0908	0.1014	0.1478	0.2697	0.1046	0.2379	0.2461	0.1285	0.394	0.025	0.0996	0.2288	0.1423	0.0811	0.2356	0.2777	0.0883	0.0647	0.122	0.0558	0.0189	0.2663	0.1757	0.0433	0.1666	0.069	0.0947	0.1398	0.4455	0.228	0.091	0.0388	0.2476	0.2171	0.6159	0.1789	0.1024	0.3884	0.2344	0.1968
MGAT1|75020|AP	0.1351	0.0623	0.1012	0.072	0.1816	0.0908	0.0659	0.1125	0.1219	0.1623	0.0444	0.031	0.0639	0.0543	0.1635	0.0868	0.2342	0.3236	0.1465	0.1483	0.723	0.0383	0.1657	0.1381	0.1451	0.1141	0.1784	0.1868	0.0788	0.0768	0.0764	0.1181	0.0405	0.0465	0.056	0.0515	0.1488	0.0977	0.2766	0.1688	0.0885	0.1291	0.0584	0.0506	0.1047	0.0805	0.0962	0.1743	0.1332
TBXAS1|81965|AP	0.079	0.0717	0.1914	0.2325	0.1121	0.0571	0.7158	0.1655	0.1121	0.2333	0.0493	0.176	0.5225	0.1877	0.2747	0.2612	0.1779	0.7665	0.4863	0.1779	0	0.1121	0	0.2747	0.7965	0.5013	0.2653	0.0806	0.0224	0.3164	0.1253	0.1375	0.3355	0.2291	0.3571	0.9604	0.3082	0.4024	0.22342	0.23345	0.6387	0.2045	0.4745	0.57	0.4961	0.7466	0.32688	0.0738	0.2016
PPHLN1|21214|AT	0.0749	0.0254	0.0431	0.0362	0.02	0.0288	0.0227	0.0496	0.145	0.0421	0.1243	0.0394	0.0217	0.0336	0.0565	0.0045	0.0509	0.0489	0.0212	0.005	0.0817	0.0518	0.098	0.0178	0.0147	0.0191	0.0241	0.082	0.1149	0.0283	0.0878	0.0276	0.0675	0.0289	0.0236	0.0109	0.0598	0.0179	0.0229	0.0839	0.1205	0.049	0.083	0.0161	0.0759	0.1501	0.0617	0.0861	0.0162
KCNAB2|360|AP	0.1524	0.0652	0.526	0.0772	0.1132	0.1582	0.2904	0.0703	0.1515	0.1056	0.0228	0.1943	0.1532	0.2186	0.2819	0.4828	0.3838	0.0799	0.202	0.1991	0.0472	0.3057	0.1829	0.3395	0.2099	0.1785	0.1205	0.4583	0.0858	0.166	0.1643	0.7169	0.2656	0.1076	0.0535	0.6655	0.1783	0.3044	0.1943	0.1162	0.0993	0.2568	0.1844	0.2355	0.1126	0.4307	0.2503	0.0675	0.6993
CARM1|47600|ES	0.0201	0.0136	0.0403	0.0358	0.0033	0.0523	0.0521	0.0551	0.0522	0.0285	0.0085	0.0314	0.093	0.0108	0.1679	0.0796	0.037	0.2353	0.0407	0.0818	0.5517	0.0504	0.1256	0.1579	0	0.0825	0.0128	0.0131	0.0799	0.069	0.1272	0	0.0322	0.0109	0.0307	0.1875	0.0631	0.0339	0.0469	0.0124	0.0057	0.0566	0.1096	0.4935	0.2471	0.0445	0.1756	0.0231	0.5517
VSTM1|51760|ME	0.0304	0.3737	0	0.0279	0.0591	0.1677	0.02	0.0196	0.1165	0.248	0.248	0	0.27498	0.4766	0	0.2602	0.1137	0.0048	0	0.0079	0	0.1029	0.1853	0.0836	0.074	0.0762	0	0.099	0.2087	0.1037	0	0	0.248	0	0.0128	0	0.1023	0.074	0	0	0	0.1496	0.0124	0	0.1398	0	0	0.0368	0.0285
MACF1|1888|ES	0.2032	0.1638	0.1386	0.0639	0.1489	0.0978	0.0231	0.3224	0	0.1816	0.3625	0.0305	0.280471	0.1789	0.0696	0.287667	0.0969	0.6752	0.0319	0.0272	0.6846	0.3298	0.1041	0.0164	0.0175	0.233	0.0983	0.3633	0.1673	0.6375	0.2808	0.215733	0.224778	0.25552	0.31531	0.256012	0.3486	0.189843	0.1007	0.0411	0.0272	0.1228	0.3702	1	0.5104	0.0338	0.0822	0.0797	0.1687
SEC31A|100885|ES	0.6624	0.4781	0.7913	0.40219	0.3068	0.4466	0.2236	0.5312	0.1246	0.3087	0.8764	0.4336	0.428	0.2108	0.3067	0.41533	0.6558	0.46924	0.42834	0.7358	0.5557	0.7916	0.5349	0.248	0.2291	0.2211	0.5078	0.5403	0.2402	0.1666	0.5209	0.8476	0.6293	0.6183	0.5271	0.438	0.4185	0.3074	0.4882	0.34732	0.4909	0.4469	0.418	0.5373	0.6116	0.4904	0.3997	0.4084	0.7593
ITGB3|42068|AT	0.4573	0.6019	0.4996	0.5118	0.6899	0.1863	0.4616	0.783	0.0295	0.4322	0.555	0.6493	0.3572	0.4088	0.7923	0.8007	0.5139	0.1636	0.7079	0.5708	0.0714	0.5476	0.1669	0.7446	0.4544	0.6077	0.4145	0.3006	0.6391	0.1122	0.1616	0.8418	0.395	0.5628	0.2966	0.6395	0.3406	0.525	0.6889	0.0569	0.2336	0.2476	0.5223	0.7412	0.1635	0.22	0.6191	0.1087	0.7911
PTPN6|20022|AP	0.5006	0.5019	0.7088	0.6782	0.3708	0.709	0.7315	0.385	0.527	0.4782	0.3373	0.7165	0.4958	0.4385	0.6637	0.8279	0.5386	0.3605	0.7591	0.6164	0.1676	0.923	0.4621	0.6365	0.8595	0.6708	0.6844	0.7614	0.3763	0.3038	0.351	0.8545	0.5641	0.5576	0.6507	0.4355	0.628	0.5996	0.918	0.3678	0.6289	0.4447	0.3197	0.3788	0.312	0.7543	0.5215	0.4675	0.145
DIXDC1|18707|AP	0.3786	0.1628	0.21799	0.3061	0.0816	0.136	0.0754	0.1674	0.196	0.1063	0.2981	0.5806	0.27723	0.1805	0.0502	0.15164	0.4356	0.4336	0.37	0	0.6845	0.3349	0.196	0.0368	0.0425	0.1257	0.2034	0.484	0.1312	0.8831	0.3109	0.0974	0.21521	0.19681	0.2086	0.13904	0.3297	0.16257	0.18983	0.19695	0.1815	0.1676	0.2011	0	0.26576	0	0.6545	0.23086	0.2185
CD44|15130|ES	0.08	0.0006	0.244	0.0001	0.0003	0.0161	0.0088	0.0582	0.0029	0.006	0.0215	0.0887	0.2503	0.4173	0.0027	0.0046	0.0389	0.3897	0.5106	0.0593	0.2883	0.3462	0.0981	0.2254	0.0013	0.0151	0.02	0.0096	0.3505	0.0572	0.0527	0.0411	0.058	0.0535	0.0289	0.0448	0.0715	0.0479	0.0401	0.0293	0.0963	0.0716	0.0228	0.0106	0.132	0.3531	0.0357	0.0461	0.4284
SH3KBP1|88642|AP	0.057	0.3256	0.1682	0.0171	0.3807	0.2917	0.1162	0.3373	0.091	0.1461	0.158	0	0.0992	0.0494	0.1055	0.0229	0.0871	0.7109	0.2979	0.276911	0.5457	0.108	0.2818	0.0522	0.4436	0.1107	0.0778	0.0947	0.3688	0.1214	0.1515	0.1897	0.0544	0.1138	0.173	0.1168	0.0663	0.1866	0	0	0.0112	0.2869	0.389	0.2884	0.5252	0.0073	0.0776	0.3155	0.4459
TTC39C|44850|AP	0	0.0526	0.0566	0.023	0.1957	0.0116	0.05	0.1456	0	0.016	0.0566	0.0766	0.2597	0.3105	0.0081	0.0094	0.1362	0.1744	0.0304	0	0.1469	0.1715	0.0602	0.0105	0.2811	0.0012	0.0468	0.0174	0.1504	0.0255	0.0334	0.1975	0.0418	0	0.0185	0.1105	0.0147	0.0254	0.0715	0.0431	0.0599	0.0827	0.0698	0.0161	0.0266	0	0.0398	0	0
ABI1|11048|ES	0.2993	0.2164	0.1178	0.2019	0.2175	0.2258	0.1251	0.3671	0.1574	0.4506	0.2361	0.1088	0.9128	0.1901	0.1986	0.1103	0.1302	0.3905	0.1384	0.8271	0.0528	0.04	0.217	0.1207	0.2483	0.3182	0.124	0.1186	0.2302	0.3281	0.3065	0.0909	0.2132	0.1043	0.1377	0.2352	0.2055	0.1596	0.133	0.1637	0.2266	0.248	0.7131	0.3992	0.1813	0.1537	0.167	0.2155	0.257178
SLC2A5|556|RI	0.0429	0.0582	0.32	0.1792	0.0171	0.0402	0.0601	0.2006	0.167	0.0444	0.06336	0.0462	0.0171	0.0387	0.1916	1	0.0429	0.3855	1	0.3035	0.453378	0.0935778	0.1484	0.4848	0.0115	0.2648	0.036	0.0497	0.3508	0.1475	0.2073	1	0.04795	0.0147	0.2286	0.1886	0.1404	0.3113	0.169575	0.124	0.1905	0.2518	0.0613	0.1621	0.1978	0.1224	0.1207	0.173	1
HOXB3|42195|AP	0	0	0.0984	0.0527	0.11702	0	0.3227	0.082	0.2302	0.4801	0	0	0	0.3956	0.3951	0	0.2286	0.1164	0	0	0.0371	0	0	0	0.5145	0	0	0.2678	0.3481	0.5167	0.0359	0.07313	0.09516	0	0	0	0.1896	0	0	0.0759	0	0.1023	0.192	0	0	0	0.116	0	0
SIN3A|31877|AP	0.0779	0.2171	0.0904	0.0415	0.0651	0.0405	0.1364	0.0946	0.0207	0.147	0.0378	0.0779	0.0768	0.1895	0.0947	0.0816	0.0837	0	0.1597	0	0.122925	0.0858	0	0.1789	0.0713	0.0821	0.0816	0.0904	0.08976	0.0929	0	0	0	0.0816	0.3255	0.12308	0.1743	0.0955667	0.151	0.3255	0	0.0816	0.10538	0.16505	0.3602	0.1234	0.2658	0	0.14118
EVI5L|47191|ES	0.1951	0.0941	0.2143	0.3896	0.284	0.0941	0.0563	0.1812	0.0501	0.1951	0.053	0.1791	0.3038	0.0245	0.1081	0.11166	0.1006	0.25732	0	0.127	0.24924	0.1951	0.11483	0.1437	0.1575	0.3889	0.0941	0.1476	0.1951	0.0912	0.053	0.0678	0.041	0.0435	0.10403	0.172	0.1951	0.141722	0.2143	0.0369	0.127	0	0.2878	0.152178	0.0369	0.0272	0.1951	0	0
OXR1|84844|AP	0.0921	0.0323	0.0693	0.0639	0.5211	0.4366	0.2509	0.149	0.2245	0.1569	0.0409	0.1049	0.119	0.4484	0.1973	0.1282	0.3722	0.6739	0.275	0.2031	0.8306	0.1217	0.3887	0.0622	0.3196	0.1557	0.1731	0.1407	0.0898	0.3451	0.0844	0	0.0297	0.0715	0.4584	0	0.2058	0.1374	0.1289	0.1158	0	0.0484	0.0774	0.1197	0	0.1564	0.0272	0.0798	0.1746
ADCY7|36374|AT	0.065	0.0526	0.1644	0.135	0.0935	0.0262	0.0381	0.066	0.0759	0.039	0.0296	0.1984	0	0.0714	0.0341	0.085	0.1897	0.2178	0.0738	0.0324	0.0841	0.0624	0.0796	0.2903	0.0924	0.0184	0.1426	0.0874	0.0883	0.0214	0.0698	0.2958	0.3295	0.1903	0.1121	0.3363	0.0502	0.6639	0.3937	0.0502	0.1328	0.1568	0.1668	0.4512	0.0425	0.0885	0.1728	0.1228	0.4235
GPR56|36573|AP	0.0185	0.0177	0.0291	0.1697	0.1624	0.065	0.022	0.0387	0.0709	0.023	0.0205	0.0077	0.0141	0.6234	0.0058	0.0106	0.0298	0.118	0.0237	0.0085	0.1037	0.0201	0.0573	0.0195	0.0341	0.0314	0.0116	0.0169	0.0539	0.0349	0.021	0.0085	0.0428	0.0167	0.0677	0.0176	0.0437	0.0513	0.0215	0.0867	0.0494	0.0345	0.0173	0.0855	0.0312	0.077	0.0277	0.0149	0.0405
GPR35|58298|AP	0.1164	0.1038	0.0595	0	0.2947	0.0187	0.1588	0.0875	0.7148	0.2144	0.0622	0	0.3269	0.4388	0.304	0.0113	0.1876	0.1788	0.2137	0.1071	0.2614	0.0893	0.3149	0.391	0.162967	0.2498	0.0444	0.0562	0.2192	0.562	0.3639	0.23823	0.231578	0.4545	0.0826	0.0479	0.3433	0.0183	0.0293	0.2383	0.0366	0.2189	0.1232	0.063	0.1502	0.0693	0.075	0.0558	0
CSMD2|1688|AT	0	0.0571	0	0.02	0	0.0445	0.0598	0	0.0564	0.0533	0	0	0.1314	0.0248	0.1146	0.1311	0.0878	0.0479	0	0.0396	0	0	0	0.0551	0.2128	0.0896	0	0.0536	0	0.0948	0.0746	0	0	0.0391	0.119	0.1933	0.0368	0.0787	0.0728	0.1227	0.2477	0.0782	0.0392	0.0388	0.1083	0	0.2006	0.0409	0
PRKAR1B|78509|AP	0.1126	0.0819	0.0375	0.0595	0	0	0.0276	0.0067	0.0795	0.0345	0.039	0.0569	0.0683778	0.0106	0.0357	0.0321	0.0103	0	0.0344	0.1158	0.17478	0.0773	0.09818	0	0	0.0161	0	0	0.0393	0.0373	0.032	0	0	0	0.0244	0.0301	0.0566	0.0543	0.09291	0.0632	0.0226	0.046	0.0489	0	0	0.03443	0	0.06169	0.0633889
CD44|15128|ES	0.2655	0.0238	0.0415	0.0063	0.0067	0.0127	0.0712	0.1374	0.0697	0.0201	0.0968	0.1987	0.5992	0.8177	0.0833	0	0.1662	0.3187	0.6402	0.0491	0	0.4811	0.2525	0.5244	0.0022	0.1337	0.1689	0.3372	0.5667	0.1324	0.4313	0.1932	0.3165	0.1653	0.0235	0.2417	0.0674	0.1439	0.3902	0.2509	0.37	0.3145	0.1791	0.0259	0.1411	0.4362	0.053	0.1792	0
ZNF677|51704|AT	0.1094	0.0576	0.0113	0.0622	0.0531	0.0268	0.0808	0.0221	0.08	0.04	0.0716	0.0643	0	0.0542	0.0175	0	0.0795	0.0681	0.0188	0.0523	0.0792	0.0637	0.0197	0.0546	0.1529	0.0557	0.0637	0.0264	0.0233	0.0234	0.0939	0.0397	0.1489	0	0	0	0.0802	0.0222	0.0381	0	0.0691	0.0808	0	0.0081	0	0.036	0	0	0
ACOT9|88690|AP	0.0719	0.084	0.0171	0.0103	0.0707	0.0368	0.0671	0.0848	0.0148	0.0791	0.0137	0.0032	0.0132	0.0021	0.0177	0.0152	0.0685	0.2165	0.0045	0.1316	0.4184	0.0269	0.0769	0.0947	0.0139	0.0292	0.2107	0.006	0.082	0.0883	0.0519	0.0106	0.0421	0.0123	0.0784	0.0811	0.0985	0.1711	0.0384	0.0032	0.0124	0.1775	0.0137	0.4855	0.0276	0.0076	0.0291	0.0974	0.7325
SORBS1|12636|ES	0.301	0.1512	0.5305	0.6601	0.2601	0.4129	0.4748	0.4181	0.2494	0.4197	0.2151	0.0413	0.4013	0.5507	0.4312	0.6784	0.4794	0.7919	0.5249	0.66373	0.6818	0.35607	0.3857	0.9378	0.7683	0.3936	0.3996	0.0519	0.3987	0.6979	0.5567	0.48184	0.28541	0.7068	1	0.70874	0.8689	0.72801	0.44851	0.3192	0.41281	0.5396	0.5663	0.8577	0.662	0.7834	1	0.7509	1
SPATA13|25473|AP	0.0743	0.1364	0.0288	0.315	0.21836	0.315	0	0.1887	0.5676	0.5708	0.1858	0	0.176657	0.4699	0.0482	0.142514	0.4207	0.5021	0.2434	0.20898	0.8207	0.0486	0.0428	0.1509	0.15478	0.3728	0.0847	0.1834	0.0611	0.1916	0.23435	0.226543	0.1814	0.1193	0.4866	0.2058	0.21335	0.193371	0.0953	0.2243	0.22126	0	0.3176	0.17445	0.21781	0.1059	0.1047	0.18811	0.6154
CCDC108|57577|AT	0.11024	0.0195	0.1723	0.09226	0.08187	0.3232	0.0032	0.0147	0.0395	0.021	0.2106	0.262	0.07469	0.11626	0.4884	0.0091	0.0384	0.43	0.09609	0.0219	0	0.0261	0.4662	0.0346	0.016	0.0901	0.51	0.3109	0.0791	0	0.1548	0.0163	0.0515	0	0.07826	0	0.0696	0.0911	0.0263	0	0.06846	0.0763	0.0843	0	0.362	0	0.2052	0.4578	0.4718
PPP1R14A|49593|AP	0.1439	0.0349	0.1334	0.0846	0.0049	0.0501	0.011	0.0916	0.0804	0.029	0.0732	0.1121	0.0131	0.0249	0.0281	0.0541	0.2733	0.5417	0.1422	0.0285	0.295489	0.1883	0.2101	0.0817	0.0191	0.1188	0.0915	0.2205	0.1827	0.1291	0.2503	0.1556	0.1336	0.0444	0.1729	0.0196	0.0618	0.0482	0.0467	0.0143	0.0498	0.1683	0.0965	0.0687	0.1817	0.0061	0.0307	0.083	0.0646
PTK2|85291|AP	0.1673	0.1184	0.0817	0.1163	0.0341	0.0792	0.1514	0.0068	0.1021	0.0722	0.1233	0.229	0.1357	0.0806	0.0505	0.0372	0.2938	0.2873	0	0.0436	0.1662	0.2615	0	0.0664	0.0118	0.0804	0.0673	0.1702	0.0984	0.071	0.024	0.0747	0.0857	0.0904	0.0986	0.1414	0.1284	0.06	0.1763	0	0.0618	0.0597	0.116	0.0537	0.0785	0.067	0.1025	0.1115	0.0182
EPHA3|65671|AT	0.0794	0.0776	0.1305	0.4505	0.1545	0.1511	0.2327	0	0.1578	0	0	0.0189	0.0144	0.1174	0	0.1489	0.1124	0.3524	0.267	0.1799	0.2887	0.1091	0.1364	0.3601	0.0183	0.179	0.1906	0	0.2063	0.1617	0.1801	0.2732	0.198	0.1726	0.1147	0.295	0.0974	0.2647	0.1213	0.0758	0.1967	0.3494	0.2343	0	0.3235	0.1299	0.3559	0.1022	0.3655
PHF8|89231|AP	0.2274	0.1399	0.1338	0.0698	0.0422	0.0998	0.0533	0.149	0.0444	0.2484	0.0145	0	0.2513	0.0925	0.1571	0.0603	0.0557	0.0577	0.2239	0.2188	0.092	0.0739	0	0.1296	0.0933	0.4485	0	0.3482	0.0163	0	0.1367	0	0.3348	0.0227	0.0259	0.11394	0.127	0.10056	0.0812	0.07	0.0638	0.1336	0.2744	0.1051	0.0941	0	0.1081	0.1055	0.3348
TMEM130|80589|AP	0.4164	0.2896	0.5342	0.5135	1	0.5396	0.588	0.4654	0.6904	0.4478	0.2031	0.309444	0.6709	0.426	0.6934	0.3532	0.5116	0.9126	0.7681	0.412	1	0.3262	0.6143	1	1	0.5657	0.5603	0.1918	0.7536	1	0.5001	0.5663	0.3376	0.821	1	0.8689	0.4519	1	1	0.7536	0.51531	0.4333	0.5295	0.7113	0.6366	0.836	0.6884	0.6124	1
E2F5|84324|AP	0	0.0307	0	0.2272	0.0792	0.3692	0.1732	0.14	0.0502	0.2706	0.3362	0.1516	0.4647	0.1935	0.0974	0.3629	0.1178	0.8783	0	0.0474	0.59658	0	0.0979	0.293	0.0114	0.21	0.0948	0	0	0.2753	0.2217	0	0.0639	0.044	0.0482	0.378	0.1249	0.17213	0	0.1029	0	0.1029	0.0799	0.3629	0.386	0	0.092	0.1379	0.254956
TNFRSF10C|83065|AT	0.0533	0.0928	0.6305	0.1724	0.7568	0.1611	0.214	0.2974	0.0126	0.2786	0.2012	0.2946	0.31945	0.1856	0.6713	0.5028	0.0292	0.0734	0	0.5402	0.1285	0.0605	0.2652	0.1816	0.1537	0.0168	0.353	0.0137	0.1004	0.1068	0.4997	0.0442	0.171	0.1213	0.3299	0.8685	0.2372	0.6664	0.2169	0.1941	0.0846	0.3382	0.2418	0.529	0.4951	0.8265	0.8165	0.2409	0.4976
RPS23|72687|AT	0.0182	0.0494	0.0534	0.1713	0.0894	0.0798	0.002	0.1024	0.0223	0.0457	0.0246	0.036	0.1534	0.0397	0.0124	0.1656	0.0473	0.0703	0.0165	0.135	0.0599	0.0213	0.0967	0.0384	0.0082	0.0567	0.0217	0.0153	0.0917	0.0328	0.0806	0.0082	0.0479	0.0064	0.064	0.0936	0.0549	0.006	0.0678	0.008	0.0538	0.0416	0.0291	0.1389	0.1291	0.0452	0.3205	0.074	0.1064
LNX1|69316|AP	0	0	0.0387	0	0.015475	0	0	0	0.0136	0	0.0786	0	0.0725	0.0277889	0	0	0	0.4508	0	0	0.6099	0	0	0	0.0397	0.0117	0.0285	0	0	0	0.0448	0	0	0	0.0808	0.0481143	0	0.05028	0.0263	0	0.02323	0	0	0.0703143	0	0	0	0	0
CD44|15142|ES	0.1259	0.0287	0.0762	0.11785	0.0977778	0.0448	0.0318	0.0355	0.1308	0.0102	0.0453	0.3053	0.0915571	0.3327	0.14227	0.159986	0.1249	0.1759	0.1339	0.2787	0.18905	0.2362	0.1061	0.272	0.0937111	0.09091	0.13503	0.2317	0.0705	0.08584	0.1555	0.4797	0.4751	0.237	0.3172	0.1385	0.0174	0.15175	0.1802	0.3766	0.2686	0.088	0.0782	0.1654	0.0785	0.3299	0.11236	0.1559	0.162743
CHID1|13803|AP	0.2131	0.1097	0.0172	0.468	0.0126	0.0747	0.0186	0.05	0.0629	0.0415	0.1976	0.0096	0.0306	0.0651	0.0492	0	0.0332	0	0.0198	0	0.2806	0.0249	0.0615	0.0502	0.0167	0.0956	0.0125	0.0401	0.1272	0.0957	0.0576	0.0119	0.0054	0.0445	0.0225	0	0.0269	0.0202	0.0134	0.018	0.0758	0.0336	0.0524	0.0938	0.1063	0	0.0103	0	0.1328
[truncated: 438 more columns]
